# Supplementary material
Source: PubMed Central journal article supplement (PMC5834036)
Supplement: mdw434_suppl_tables2b.pdf [file mdw434_suppl_tables2b.pdf]

## Supplementary 2B

| pathway name                                                                                            | member genes                                                                                                                                                                                                                                                                                                                                                                                                                                                                                                              |
|---------------------------------------------------------------------------------------------------------|---------------------------------------------------------------------------------------------------------------------------------------------------------------------------------------------------------------------------------------------------------------------------------------------------------------------------------------------------------------------------------------------------------------------------------------------------------------------------------------------------------------------------|
| acetylation and deacetylation of rela in nucleus                                                        | EP300,CREBBP,NFKBIA,RELA,HDAC3,EIF4E,OPN1LW,PRDX2,ARHGEF7,PAG1,PCBP4                                                                                                                                                                                                                                                                                                                                                                                                                                                      |
| visceral fat deposits and the metabolic syndrome                                                        | NR3C1,PPARG,RXRA,TNF,HSD11B1,ADIPOQ,RETN,LPL,LCP1                                                                                                                                                                                                                                                                                                                                                                                                                                                                         |
| role of egf receptor transactivation by gpcrs in cardiac hypertrophy                                    | RELA,NFKBIA,EGF,EGFR,GNA11,AGT,GNGT1,GNB1,AGTR2,EDN1,GRB2,SOS1,SHC1,RAF1,JUN,ADAM12,MYC,RPS6KA1,FOS,PLCG1,RHOA,MAP2K2,MAP2K1,HRAS,MAPK1,MAPK3,AGXT,DAG1,ROS1,ARHGEF7,DYT10,MTG1,PRRT2                                                                                                                                                                                                                                                                                                                                     |
| role of parkin in ubiquitin-proteasomal pathway                                                         | SUMO1,GPR37,PARK2,UBE2L3,WDT1,UBE2J1,ATP8A2                                                                                                                                                                                                                                                                                                                                                                                                                                                                               |
| fmlp induced chemokine gene expression in hmc-1 cells                                                   | GNA15,GNGT1,GNB1,FPR1,RELA,NFKBIA,PPP3CA,PPP3CC,PPP3CB,ELK1,MAP2K3,PAK1,MAP2K6,NCF1,NCF2,MAP2K1,MAPK1,RAF1,MAPK14,RAC1,MAP2K2,MAPK3,PLCB1,HRAS,PIK3C2G,KRIT1,DAG1,PKN1,CAMK1,CAMKK2,KCNH4,DYT10,PRRT2,KCNH8                                                                                                                                                                                                                                                                                                               |
| west nile virus                                                                                         | APAF1,CASP9,EEF1A1,CYCS,TIAL1,CASP7,CASP6,TIA1,CASP3                                                                                                                                                                                                                                                                                                                                                                                                                                                                      |
| chromatin remodeling by hswi/snf atp-dependent complexes                                                | NR3C1,NF1,GTF2F1,GTF2A1,GTF2B,POLR2A,GTF3A,GTF2E1,ACTB,SMARCB1,SMARCE1,SMARCC2,SMARCC1,SMARCD1,ARID1A,SMARCA4,TBP,POTEF                                                                                                                                                                                                                                                                                                                                                                                                   |
| alk in cardiac myocytes                                                                                 | NKX2-5,GATA4,BMPR1A,BMPR2,ATF2,TGFBR2,TGFBR1,NOG,CHRD,MYL2,MEF2C,NPPB,RFK1,MAP3K7,SMAD6,NPPA,GDNF,SLC19A1                                                                                                                                                                                                                                                                                                                                                                                                                 |
| BARD1 signaling events                                                                                  | BARD1,BRCA1,FANCE,FANCA,FANCF,FANCC,FANCL,FANCG,CDK2,FANCD2,BACH1,TOPBP1,RAD50,CSTF1,RAD51,PCNA,NPM1,ATM,ATR,EWSR1,XRCC6,MRE11A,NBN,PRB3,RBBP8,TP53,UBE2D3,UBE2L3,XRCC5,NLRP2,BRIP1,ANTXR1,MMAB,SERPINA2P                                                                                                                                                                                                                                                                                                                 |
| cystic fibrosis transmembrane conductance regulator (cfr) and beta 2 adrenergic receptor (b2ar) pathway | SLC9A3R1,PRKAR1A,GNGT1,PRKACG,PRKAR2A,GNB1,PRKACB,ADRB2,PRKAR1B,PRKAR2B,GNAS,CFTR,ADCY1,CAMP,EZR,ATP8A2,MTG1,CHAMP1                                                                                                                                                                                                                                                                                                                                                                                                       |
| IL5-mediated signaling events                                                                           | STAT5A,IL5RA,IL5,CSF2RB,JAK2,LYN,GRB2,PIK3R1,CISH,PIM1,PIK3CA,PIK3CB,PIK3CD,PIK3CG,PTPN11,STAT5B,LONP1,THOC1,SIRPA                                                                                                                                                                                                                                                                                                                                                                                                        |
| Regulation of RAC1 activity                                                                             | RHOA,CDC42,RAC1,EPS8,SOS1,ABI1,DOCK1,ELMO1,NME1,DEF6,VAV1,TIAM2,RALBP1,BCR,RASGRF2,RAP1GDS1,ARHGAP17,RASGRF1,PREX2,DOCK2,TIAM1,VAV3,ARHGAP9,KALRN,VAV2,DOCK6,TRIO,ABR,PREX1,ARHGEF2,PAK1,ARHGAP1,ARHGDI,DEFA6,MCF2,PKN1,RMRP,NGEF,REPS1,MTG1,ARHGEF25,SPATA13                                                                                                                                                                                                                                                             |
| Signaling events mediated by the Hedgehog family                                                        | DISP1,SMO,PTCH1,LRPAP1,PIK3R1,BOC,HHIP,PTCH2,GAS1,GLI2,SHH,HHAT,AKT1,ADRBK1,PIK3CA,PIK3CB,PIK3CD,PIK3CG,PTHLH,PMEL,STIL,THOC1,CDON,SMOX,SIRPA                                                                                                                                                                                                                                                                                                                                                                             |
| nfkB activation by nontypeable hemophilus influenzae                                                    | RELA,CREBBP,EP300,TGFBR2,TGFBR1,SMAD4,SMAD3,NFKBIA,NR3C1,MYD88,TLR2,TNF,IL1B,MUC5AC,MUC2,MAP3K7,MAP4K4,MAP2K6,MAP2K3,MAPK14,MAPK11,IL8,DUSP1,EIF4E,OPN1LW,ARHGEF7,DUSP12,PAG1,PCBP4                                                                                                                                                                                                                                                                                                                                       |
| phosphatidylcholine biosynthesis pathway                                                                | PCYT1A,CEPT1,CHKA,DAG1,MATN1,SLC25A1,WDT1,ATP8A2                                                                                                                                                                                                                                                                                                                                                                                                                                                                          |
| ErbB4 signaling events                                                                                  | STAT5A,TAB2,NCOR1,ERBB4,ERBB2,GRB2,WWOX,HBEGF,STAT5B,FYN,JAK2,LRIG1,YAP1,NEDD4,GRIN2B,WWP1,ITCH,MDM2,CBFA2T3,DLG4,PIK3CA,PIK3CB,PIK3CD,PIK3CG,SHC1,ADAM17,THOC1,SIRPA                                                                                                                                                                                                                                                                                                                                                     |
| tpo signaling pathway                                                                                   | PIK3R1,PIK3CA,FOS,JUN,STAT3,STAT1,THPO,MPL,GRB2,SOS1,SHC1,CSNK2A1,MAP2K1,JAK2,ELK1,RAF1,RASA1,PLCG1,MAPK3,HRAS,TPO,CSNK2A2,DAG1,FOSB,JUNB,JUND,PIK3CB,PIK3CD,PIK3CG,STAT5A,STAT5B,SYNGAP1,KCNH4,DYT10,MTG1,PRRT2,KCNH8                                                                                                                                                                                                                                                                                                    |
| Degradation of beta catenin                                                                             | AXIN1,LRP6,FZD5,WNT3A,SKP1,CUL1,APC,AXIN2,DVL1,KITLG,PROC,DVL1P1                                                                                                                                                                                                                                                                                                                                                                                                                                                          |
| oxidative stress induced gene expression via nrf2                                                       | KEAP1,NFE2L2,GSTA2,AKR7A2,UGT1A6,CRYZ,POR,GABPA,ROS1,VDAC2,DYT10,PRRT2                                                                                                                                                                                                                                                                                                                                                                                                                                                    |
| HIF-1-alpha transcription factor network                                                                | JUNB,FOS,FOSB,JUND,JUN,ARNT,HIF1A,SMAD4,SMAD3,SP1,HDAC7,CITED2,ENO1,NDRG1,GCK,PKM,PGM1,LDHA,PGK1,ALDOA,CREB1,ETS1,ID2,HMOX1,PFKL,FURIN,NOX2,AKT1,FECH,ABCG2,ENG,HK2,EPO,TF,HK1,ADM,PFKFB3,CP,GATA2,DEC1,CXCL12,CXCR4,TERT,IGFBP1,TFF3,BNIP3,MCL1,NPM1,PLIN2,SLC25A6,CA9,CREBBP,EDN1,EIF4E,F3,FOSL2,HNF4A,KCNA4,KCNA5,KIF2A,NT5E,SERPINE1,SERPINE2,ABCB1,PSG1,MAP4K2,OPN1LW,SLC2A1,SLC2A3,TFRC,TIMP1,FOSL1,EPX,BHLHE40,HDAC9,NCOA2,RNASEH2A,COPS5,TBC1D9,HOOK2,HOOK1,EGLN1,PAG1,PCBP4,BHLHE41,EGLN3,DAND5,TAC4,NANOS2,MIA3 |

|                                                                            |                                                                                                                                                                                                                                                                                                                                                                                                                                                                                                                                                                                                                                                                                     |
|----------------------------------------------------------------------------|-------------------------------------------------------------------------------------------------------------------------------------------------------------------------------------------------------------------------------------------------------------------------------------------------------------------------------------------------------------------------------------------------------------------------------------------------------------------------------------------------------------------------------------------------------------------------------------------------------------------------------------------------------------------------------------|
| Regulation of nuclear beta catenin signaling and target gene transcription | PITX2,HDAC1,TNIK,TCF4,MYF5,HBP1,JUN,DVL3,TCF3,TERT,KLF4,BCL9,TLE2,LEF1,CDX1,APC,AR,TLE4,SKP1,TRRAP,CUL1,TLE1,MED12,AES,KCNIP4,ZCCHC12,SALL4,MITF,CDX4,CACNA1G,COX2,ID2,IL8,CYR61,DKK1,DKK4,SP5,FGF4,MYC,AXIN2,ADRA1D,AKR1B1,AREG,CDKN2A,CREBBP,VCAN,EIF4E,KITLG,PROC,PTGS2,OPN1LW,SNAI2,SMARCA4,TBL1X,HNF1A,TCF7L2,NCOA2,IGF2BP1,RUVBL2,PAG1,CTNBP1,PCBP4,TBL1XR1,TCF7L1,TBL1Y                                                                                                                                                                                                                                                                                                      |
| Cellular roles of Anthrax toxin                                            | CAMP,IL18,AMY2A,KRIT1,EPB42,IRF6,PRH1,MAP2K1,MAP2K2,MAP2K3,MAP2K6,MAP2K7,MAP2K4,BLOC1S6,ATP8A2,CHAMP1                                                                                                                                                                                                                                                                                                                                                                                                                                                                                                                                                                               |
| EPHA forward signaling                                                     | CDC42,RAC1,PAK1,RHOA,EPHA4,EPHA8,EPHA3,CRK,CBL,CDK5,PIK3CA,PIK3CB,PIK3CD,PIK3CG,PKN1,THOC1,NGEF,MTG1,SIRPA                                                                                                                                                                                                                                                                                                                                                                                                                                                                                                                                                                          |
| bcr signaling pathway                                                      | FOS,JUN,LYN,CD79B,BLNK,BCR,BTK,CD79A,PPP3CA,PPP3CC,PPP3CB,GRB2,SOS1,SHC1,CSNK2A1,MAP2K1,VAV1,MAPK8,RAC1,ELK1,RAF1,SYK,PLCG1,MAPK3,MAP3K1,HRAS,MAPK14,KRIT1,CSNK2A2,DAG1,FOSB,JUNB,JUND,KCNH4,DYT10,MTG1,PRRT2,KCNH8                                                                                                                                                                                                                                                                                                                                                                                                                                                                 |
| E-cadherin signaling in the nascent adherens junction                      | RHOA,PIK3R1,RAC1,TIAM1,ARF6,NME1,AP1M1,PIP5K1C,IQGAP1,CDC42,SRA1,ABI1,CRK,AKT1,VAV2,PAK1,DLG1,SRC,ADRA1D,RAPGEF1,IL8,NAP1L1,PIK3CA,PIK3CB,PIK3CD,PIK3CG,PKN1,RAP1A,RMRP,SOX9,TJP1,NAPSA,THOC1,ACTR2,WASF2,CHERP,NCAP1,CYFIP1,ANGPTL2,KLHL20,C9orf156,TERF2IP,ENAH,AICDA,SCAF1,AZI2,NAA25,MTG1,SIRPA,TAB3                                                                                                                                                                                                                                                                                                                                                                            |
| Signaling mediated by p38-gamma and p38-delta                              | SNTA1,EEF2K,MAPT,PKN1,MAP2K3,MAP2K6,PRRC2A,KIAA1549L,ZAK,CRYGEP                                                                                                                                                                                                                                                                                                                                                                                                                                                                                                                                                                                                                     |
| Fc-epsilon receptor I signaling in mast cells                              | SYK,LYN,JUN,FOS,KLRG1,PIK3R1,GAB2,LAT,GRB2,FYN,HRAS,RELA,SOS1,CBL,SPHK1,ITK,FER,AKT1,PLD2,VAV1,PAK2,BTK,RAF1,DAG1,DOK1,DUSP1,S1PR1,EEF1A2,HCLS1,INPP5D,LCP2,MAP3K1,NFATC2,PIK3CA,PIK3CB,PIK3CD,PIK3CG,PKN2,MAPK1,MAPK3,MAPK8,MAP2K1,MAP2K2,MAP2K7,PTK2,PTPN11,RASA1,MAP2K4,SHC1,WIPF1,LAT2,YWHAB,IKBK,GRAP2,THOC1,YWHAQ,ORC3,DYT10,SPNS1,MTG1,PRRT2,SIRPA                                                                                                                                                                                                                                                                                                                           |
| il 3 signaling pathway                                                     | JAK2,IL3RA,CSF2RB,IL3,GRB2,SOS1,SHC1,FOS,PTPN6,HRAS,STAT5A,STAT5B                                                                                                                                                                                                                                                                                                                                                                                                                                                                                                                                                                                                                   |
| ErbB receptor signaling network                                            | ERBB2,EGFR,ERBB4,ERBB3,HBEGF,EGF,TGFA                                                                                                                                                                                                                                                                                                                                                                                                                                                                                                                                                                                                                                               |
| regulation of cell cycle progression by plk3                               | CCNB1,APAF1,CASP9,YWHAH,RASGRF1,ATM,TREX1,ATR,CYCS,BAX,TP53,PLK3,CHEK2,CHEK1,CASP7,CASP6,CASP3,ATRIP,CDK1,CDC25C,POLD1,PRRC2A,YWHAQ,KIAA1549L,ANTXR1,CRYGEP,MMAB,SERPINA2P                                                                                                                                                                                                                                                                                                                                                                                                                                                                                                          |
| aspirin blocks signaling pathway involved in platelet activation           | GNAI1,F2RL3,GNGT1,GNB1,F2R,TBXAS1,MAPK1,RAF1,MAPK3,PLA2G4A,PLCB1,HRAS,PTGS1,MAP2K1,DAG1,PAWR,NR1I2,DYT10,SLC52A2,MTG1,PRRT2,PWAR1,PWAR4,PIK3R1,PIK3CA,IL6R,ERBB2,LRPPRC,ERBB3,IL6,GRIP1,CARM1,ESR1,EP300,GRB2,SOS1,SHC1,MAPK1,MAPK3,RAF1,MAP2K2,MAP2K1,STAT3,PDPK1,AKT1,HRAS,SLC25A6,IL6ST,NM,PIK3CB,PIK3CD,PIK3CG,NCOA2,LGALS12,MTG1                                                                                                                                                                                                                                                                                                                                               |
| role of erbb2 in signal transduction and oncology                          | PIK3R1,PIK3CA,PLCB1,PDPK1,PLCG1,DAG1,PIK3CB,PIK3CD,PIK3CG                                                                                                                                                                                                                                                                                                                                                                                                                                                                                                                                                                                                                           |
| phospholipase c signaling pathway                                          | PAX5,LEF1,MYB,SIN3A,NCOR1,SKI,GATA1,MAF,HES1,PIM1,CDK6,TOM1,CEBPA,SLC25A3,ETS1,ETS2,WNT1,IQGAP1,COPA,SLC1A5,MAD1L1,CLTA,CSF1R,CEBPB,COL1A2,C11orf100,ADORA2B,SP1,MCM4,GATA3,LYZ,BCL2,KIT,GSTM1,CD34,ADA,PTCRA,MAT2A,HIPK2,PIAS3,MYC,SPI1,CD4,RAG2,NLK,ANPEP,BIRC3,ATP2B1,CDKN1B,CDKN2A,CREBBP,EIF4E,GPI,H2AFZ,HRAS,HSPA5,HSPA8,KITLG,MYF6,MYOD1,PPID,PRTN3,PSG1,PTGS2,OPN1LW,PMEL,SMARCA2,MAP3K7,NR2C2,UBE2I,PCAP,YEATS4,C21orf33,LONP1,SART3,TRIM28,TFEC,PAG1,PCBP4,ELAC2,CPEB1,MTG1,ZFPM1,DAND5                                                                                                                                                                                   |
| C-MYB transcription factor network                                         | SMAD3,SMAD4,SMAD2,NUP214,NUP153,PPM1A,KRIT1,MAP3K1,UBE2I,TGFBP1,TRAP1,PIAS4                                                                                                                                                                                                                                                                                                                                                                                                                                                                                                                                                                                                         |
| Regulation of cytoplasmic and nuclear SMAD2/3 signaling                    | JUN,JUNB,FOS,FOSB,JUND,CDC42,STAT5A,SOS1,ABI1,EP8,GAB1,PDGFRB,PDGFRB,ARPC3,ARPC4,ARPC5,ARPC1B,ARPC2,RAC1,CBL,RAB4A,GRB2,RHOA,SRF,ELK1,BRAF,PPP2CA,PPP2R1A,PPP2R2B,RAF1,PTEN,GRB10,LRP1,SRA1,DOCK4,ARAP1,JAK2,STAT1,IQGAP1,PIN1,CRK,STAT3,PLA2G4A,PAG1,ACTA2,PAK1,VAV2,CSK,MYC,SPHK1,ADRA1D,ARHGDI1,DAG1,DOK1,S1PR1,FOSL2,RAPGEF1,IL8,NAP1L1,PIK3CA,PIK3CB,PIK3CD,PIK3CG,PKLR,PPP2R4,PKN1,EIF2AK2,PTPN1,PTPN11,PTPRJ,RAB5A,RAP1A,RASA1,RPS6KA3,SLA,SOX9,STAT5B,TAGLN,SLMAP,FOSL1,KSR1,WASL,NAPSA,USP6NL,THOC1,ACTR3,ACTR2,WASF2,CNKSR1,C1D,BAIAP2,CHERP,RNASEH2A,NCKAP1,YWHAQ,PDZD2,CYFIP1,KCNH4,ANGPTL2,C9orf156,TERF2IP,AICDA,SCAF1,AZI2,NAA25,MTG1,PIGU,KCNH8,SIRPA,APOBEC3A,TAB3 |
| PDGFR-beta signaling pathway                                               |                                                                                                                                                                                                                                                                                                                                                                                                                                                                                                                                                                                                                                                                                     |

|                                                                                                   |                                                                                                                                                                                                                                                                                                                                                                                                                                            |
|---------------------------------------------------------------------------------------------------|--------------------------------------------------------------------------------------------------------------------------------------------------------------------------------------------------------------------------------------------------------------------------------------------------------------------------------------------------------------------------------------------------------------------------------------------|
| no2-dependent il-12 pathway in nk cells                                                           | IL12RB2,IL12RB1,IFNG,STAT4,TYK2,JAK2,NOS2<br>JUNB,FOS,FOSB,JUND,STAT5A,JUN,RELA,HDAC2,STAT1,SUV420H1,CDK5,CDK5R1,EGR1,FGG,IL5,IL4,IRF1,IL13,PBX1,TBP,IL2,IL6,ICAM1,IL8,HDAC1,VIPR1,CREB1,AKT1,POMC,MMP1,NR1I3,SGK1,BAX,MDM2,GATA3,AFP,TAT,TSG101,SUMO2,SPI1,CGA,CREBBP,EIF4E,FKBP4,FKBP5,FOSL2,NR3C1,NR4A1,KRT5,KRT14,KRT17,PCK2,MAPK8,OPN1LW,SELE,SMARCA4,SMARCC1,SMARCC2,SMARCD1,TP53,TRIM26,FOSL1,NCOA2,RNASEH2A,YWHAQ,PAG1,PCBP4,ATAT1 |
| Glucocorticoid receptor regulatory network                                                        | IFNGR1,IFNG,DNAJA3,JAK2,HSPA1A,CNTN2,USH1C,TAX1BP3,LIN7A,RELA,NFKBIA,REB1,TP53,WT1,TXN,ARHGEF7,VAC14                                                                                                                                                                                                                                                                                                                                       |
| chaperones modulate interferon signaling pathway                                                  | CD40,TRAF3,CD40LG,TRAF6,RELA,NFKBIA,MAP3K1,TNFAIP3,MAP4K4,ARHGEF7                                                                                                                                                                                                                                                                                                                                                                          |
| cd40l signaling pathway                                                                           | COL4A1,COL4A3,COL4A2,COL4A5,COL4A6,COL4A4,PLAT,PLAU,F9,APP,SERPINE1,WDC1                                                                                                                                                                                                                                                                                                                                                                   |
| platelet amyloid precursor protein pathway                                                        | SAP30,SAP18,RBBP4,RBBP7,MECP2,HDAC2,HDAC1,MTA2,MBD2,MBD3,MBD1,DPEP1,HDAC9,DPEP2,DPEP3                                                                                                                                                                                                                                                                                                                                                      |
| mechanisms of transcriptional repression by dna methylation                                       | GNAS,GNB1,GNGT1,CD3E,CD3D,CD3G,HLA-DRB1,HLA-DRA,LCK,CD4,ZAP70,PRKAR2B,PRKACB,PRKAR2A,PRKAR1B,PRKAR1A,PRKACG,PTPRC,CSK,ADCY1,CREBBP,CAMP,CD247,TRA,TRB,ATP8A2,MTG1,CHAMP1,TARP                                                                                                                                                                                                                                                              |
| activation of csk by camp-dependent protein kinase inhibits signaling through the t cell receptor | GNAT1,GNGT2,GNB1,ARRB1,PDE6A,PDE6B,PDE6G,GRK1,GUCA1A,SLC25A22,SLC25A18,RHO,RCVRN,NT5C2,MTG1                                                                                                                                                                                                                                                                                                                                                |
| visual signal transduction                                                                        | RELA,NFKBIA,RAF1,FOS,MYC,JUN,CUZD1,TNF,PLCB1,MAP2K2,MAP2K1,HRAS,MAPK1,MAPK3,AIRE,CTLA4,DAG1,HLA-DQA1,ARHGEF7,DYT10,NOD2,MTG1,PRRT2,CELIAC2                                                                                                                                                                                                                                                                                                 |
| cadmium induces dna synthesis and proliferation in macrophages                                    | GNA12,PRKACG,PRKAR2A,PRKAG1,PRKACB,PRKAR2B,AKAP13,RHOA,LPA,CAMP,MTG1,CHAMP1                                                                                                                                                                                                                                                                                                                                                                |
| rho-selective guanine exchange factor akap13 mediates stress fiber formation                      | GLI1,SPOP,GLI3,RBBP7,SAP30,SIN3A,SIN3B,HDAC2,HDAC1,RBBP4,SAP18,SMO,GLI2,PIAS1,GNG2,GNB1,FOXA2,AKT1,RAB23,KIF3A,IFT172,PTCH1,CREBBP,EIF4E,KITLG,MAP2K1,OPN1LW,MTSS1,SMOX,PAG1,PCBP4,MTG1                                                                                                                                                                                                                                                    |
| Hedgehog signaling events mediated by Gli proteins                                                | CLTB,COPA,ARF1,CLTA,COP,GPLD1,RASA1,ARHGEF2,RGS6,SLC2A4RG,MTG1,CARD16,ARF1P1                                                                                                                                                                                                                                                                                                                                                               |
| adp-ribosylation factor                                                                           | PCNA,CCNE1,CDK2,RB1,E2F1,CDK4,CCND1,MDM2,GADD45A,CDKN1A,BCL2,TIMP3,TP53,PAK3                                                                                                                                                                                                                                                                                                                                                               |
| p53 signaling pathway                                                                             | PIK3R1,BCL3,RELA,SRC,SYK,LCK,PIK3CA,PIK3CB,PIK3CD,PIK3CG,ARHGEF7,THOC1,SIRPA                                                                                                                                                                                                                                                                                                                                                               |
| Atypical NF-kappaB pathway                                                                        | EIF2S3,EIF2S2,EIF2S1,EIF2B5,EIF5,EIF2AK2,EIF2AK3,EIF2AK4,EIF2AK1,GSK3B,NPY4R,EIF2B4,EIF2B3                                                                                                                                                                                                                                                                                                                                                 |
| regulation of eif2                                                                                | PIK3R1,PIK3CA,PABPC1,EIF4G1,EIF4A1,EIF4E,PSMC4,EIF4EBP1,EIF2S1,EIF2S3,EIF2S2,IGF1,IGF1R,MKNK1,PTEN,PDK2,PDPK1,RPS6,INPPL1,EIF2B5,RPS6KB1,AKT1,PPP2R5D,GSK3B,MTOR,PIK3CB,PIK3CD,PIK3CG,MTG1                                                                                                                                                                                                                                                 |
| skeletal muscle hypertrophy is regulated via akt-mTOR pathway                                     | C6,C7,C8A,C8B,C9,C8G,MBL2,MASP2,MASP1,C3,C2,C5,C4B,C4A,AKR1C1,HNRNPC,CXCL10,PSMA7,IGLC7,MBL3P                                                                                                                                                                                                                                                                                                                                              |
| lectin induced complement pathway                                                                 | RHOA,CDC42,RAC1,EGFR,STAT1,PDGFD,CRK,DOCK1,TYK2,TGFB1,HGF,PAK1,VLDLR,PDGFRB,MMP12,LRP1,SRC,ADRA1D,IL6,SERPINE1,SERPINE2,PLAU,PLAUR,PKN1,SOX1,C1D,MTG1,PRAP1                                                                                                                                                                                                                                                                                |
| Urokinase-type plasminogen activator (uPA) and uPAR-mediated signaling                            | RALA,ARF6,KLC1,ACAP1,ASAP2,TSHR,AGTR1,SCAMP2,VAMP3,PIP5K1C,NME1,ADRA1D,RMRP,SLC2A4,SPAG9,EXOC5,EXOC3,MAPK8IP3,EXOC7,EXOC6,EXOC1,EXOC2,EXOC4,MTG1,EXOC8                                                                                                                                                                                                                                                                                     |
| Arf6 trafficking events                                                                           | CXCR3,GNAI2,GNG2,GNB1,CXCL11,MTOR,RICTOR,CCL11,GNAI3,CXCL9,CXCL10,CXCL13,PDK1,AKT1,RAF1,DNM1,SRC,ADRA1D,PDPK1,PF4,PIK3CA,PIK3CB,PIK3CD,PIK3CG,THOC1,MLST8,MAPKAP1,MTG1,SIRPA                                                                                                                                                                                                                                                               |
| CXCR3-mediated signaling events                                                                   |                                                                                                                                                                                                                                                                                                                                                                                                                                            |
| Glucocorticoid receptor signaling                                                                 | PIK3R1,PIK3CA,RHOA,BCL2L1,RAF1,RALGDS,CHUK,AKT1,CASP9,CDC42,PDPK1,HRAS,RALBP1,PLD1,BAD,RAC1,RALA,FOXO4,PIK3CB,PIK3CD,PIK3CG,PRKCSH,REPS1                                                                                                                                                                                                                                                                                                   |
| ras signaling pathway                                                                             | LRP6,WNT1,FZD1,DLL1,KREMEN2,DKK2,PSEN1,DKK1,PROC,CTNBB1,AXIN1,CSNK2A1,HEY2,HES7,LFNG,GSK3B,WIF1,ADAM17,HES1,DVL1,APC,CSHL1,CSNK2A2,RBPJ,PSMB6,YY1,C21orf33,DVL1P1                                                                                                                                                                                                                                                                          |
| segmentation clock                                                                                |                                                                                                                                                                                                                                                                                                                                                                                                                                            |

|                                                                                       |                                                                                                                                                                                                                                         |
|---------------------------------------------------------------------------------------|-----------------------------------------------------------------------------------------------------------------------------------------------------------------------------------------------------------------------------------------|
| proteasome complex                                                                    | PSMD14,PSMA1,PSMA5,PSMA4,PSMA3,PSMA2,PSMD3,PSMD12,PSMB7,PSMD4,RP N2,PSMD11,PSMA7,PSMA6,PSMB2,PSMB1,PSMB4,PSMB3,PSMB6,PSMB5,RPN1,U BE2A,UBE3A,BCHE,DBT,PSMC4,PSMD2,SNORA62,SNORA73A,UBA1,WDTCT1,CELA3B ,SNORD12C,ATP8A2,ENOPH1           |
| hypoxia and p53 in the cardiovascular system                                          | TP53,HIF1A,UBE2A,NFKBIB,HIC1,RPA1,TAF1,EP300,MAPK8,ATM,HSPA1A,BAX,FHL2, GADD45A,ABCB1,CDKN1A,IGFBP3,AKT1,MDM2,DBT,HSP90AA1,HSP90AA2,PAK3,S NORA62,TBP,POLR1A,SNORD12C,DNAJB1P1                                                          |
| Class I PI3K signaling events                                                         | CDC42,ARF1,RAC1,RHOA,ARF5,ARF6,RAP1A,ARAP3,PKD1,SRC,PAK1,PTEN,SGK1,DA G1,FOXO3,PDPK1,PIK3CA,PIK3CB,PIK3CD,PIK3CG,PKN1,CYTH3,CYTH2,THOC1,ADAP 1,DAPP1,MTG1,SIRPA,ARF1P1                                                                  |
| uclalpain and friends in cell spread                                                  | ITGB1,ITGA1,SPTAN1,PXN,TLN1,CAPN1,CAPNS1,PTK2,SRC,RHOA,RAC1,ACTA1,EZR, PXDN,MMRN1                                                                                                                                                       |
| ahr signal transduction pathway                                                       | AIP,AHR,ARNT,HSP90AA1,HSP90AA2,AURKAIP1,MIA3                                                                                                                                                                                            |
| bone remodeling                                                                       | RELA,TNFSF11,TNFRSF11A,IFNAR1,IFNAR2,IFNB1,NFKBIA,FOSL1,FOSL2,TRAF6,MAP K8,FOS,ARHGFEF7,IRF9                                                                                                                                            |
| Noncanonical Wnt signaling pathway                                                    | RHOA,RAC1,CHD7,SETDB1,WNT5A,FZD2,PPARG,FZD7,ROR2,DVL2,CTHRC1,DAAM1, FLNA,CDC42,WNT1,PAK1,ROCK1,DVL1,GTF3A,NFATC2,PKN1,RORA,MAP3K7,NR2C2 ,DVL1P1,MTG1                                                                                    |
| thrombin signaling and protease-activated receptors                                   | PIK3R1,PIK3CA,GNGT1,GNB1,GNAQ,GNAI1,F2RL3,F2R,RHOA,ROCK1,ADCY1,PPP1R1 2B,PTK2B,PLCB1,MAP3K7,DAG1,PAWR,PIK3CB,PIK3CD,PIK3CG,NR1I2,ARHGFEF2,DY T10,SLC2A4RG,SLC52A2,MTG1,PRRT2,PWAR1,PWAR4                                                |
| Plasma membrane estrogen receptor signaling                                           | RAC1,PAK1,CDC42,PELP1,GNG2,GNB1,RHOA,SRC,GRB2,SOS1,PIK3R1,IGF1,ROCK2,A KT1,ATF6B,DAG1,DBT,DECR1,PIK3CA,PIK3CB,PIK3CD,PIK3CG,PKN1,SNORA62,THOC 1,GNA13,SNORD12C,IGKV1D-39,MTG1,SIRPA                                                     |
| Osteopontin-mediated events                                                           | JUNB,FOS,FOSB,JUND,RHOA,CDC42,JUN,PIP5K1A,RAC1,PIK3R1,SRC,RELA,ROCK2,C D44,VAV3,PAK1,SYK,ILK,ADRA1D,PTK2B,FOSL2,MAP3K1,PIK3CA,PIK3CB,PIK3CD,PIK 3CG,PLAU,PKN1,MAPK8,FOSL1,MAP3K14,MAP4K4,THOC1,RNASEH2A,WDTCT1,ATP8 A2,MTG1,PRAP1,SIRPA |
| Netrin-mediated signaling events                                                      | FYN,DCC,UNC5A,UNC5B,UNC5C,PIK3R1,RAC1,RHOA,NCK1,PAK1,CDC42,DOCK1,EL MO1,PITPNA,MAP1B,TRIO,DAPK1,DAG1,PIK3CA,PIK3CB,PIK3CD,PIK3CG,PKN1,PTK2 ,WASL,THOC1,MTG1,SIRPA                                                                       |
| Canonical NF-kappaB pathway                                                           | RELA,BCL10,MALT1,TRAF6,NOD2,RAN,ATM,TNF,CYLD,TNFAIP3,UBE2D3,IKBKKG,RIPK 2,ERC1,IGKV1-27,ARHGFEF28,MTG1                                                                                                                                  |
| S1P4 pathway                                                                          | RHOA,RAC1,PAK1,CDC42,ATF6B,PKN1,S1PR4,MBTPS1,GNA13,S1PR5,MTG1                                                                                                                                                                           |
| tgf beta signaling pathway                                                            | TGFBR2,TGFBR1,SMAD4,SKIL,SMAD3,SMAD2,PROC,CDH1,EP300,CREBBP,MAP3K7, NR2C2,MAP2K1,SMAD7,MAPK3,TAB1,APC,EIF4E,OPN1LW,ZFYVE9,FZR1,PAG1,PCBP 4                                                                                              |
| EphrinA-EPHA pathway                                                                  | EPHA2,EPHA8                                                                                                                                                                                                                             |
| Downstream signaling in naive CD8+ T cells                                            | ELK1,FOS,JUN,JUNB,EGR1,EGR4,CD3E,CD3G,CD3D,CD8B,CD8A,IL2,STAT4,EOMES,B RAF,FASLG,RAF1,KRIT1,CD247,IL2RA,TNFRSF9,NFATC2,MAPK8,MAPK9,PTPN7,PTPR A,TNFRSF4,FOSL1,TNFRSF18,RNASEH2A,KCNH4,MTG1,KCNH8,TARP                                   |
| control of skeletal myogenesis by hdac and calcium/calmodulin-dependent kinase (camk) | CREBBP,EP300,PIK3R1,PIK3CA,MYOD1,HDAC5,YWHAH,MAPK7,GRIP1,MAPK14,AVP ,PDPK1,AKT1,CABIN1,KRIT1,EIF4E,IFNAR1,PIK3CB,PIK3CD,PIK3CG,OPN1LW,CAMK1, KAT2B,NCOA2,YWHAQ,PAG1,PCBP4,LGALS12,NLRP3                                                 |
| regulation of spermatogenesis by crem                                                 | FHL5,KIF17,CREM,FSHR,GNAS,GNGT1,GNB1,FSHB,ADCY1,XPO1,CAMP,ACT,SERPIN A3,ACTG1,ACTG2,BRD2,STXBP2,ACOT7,ATP8A2,MTG1,CHAMP1,ACTBL2,POTEKP,P OTEM                                                                                           |
| cell cycle: g2/m checkpoint                                                           | CCNB1,SFN,CDKN2D,MDM2,TP53,YWHAH,RASGRF1,CDC34,MYT1,GADD45A,CDKN 1A,RPS6KA1,WEE1,PRKDC,BRCA1,CHEK2,ATM,ATR,CHEK1,EP300,CDK1,CDC25C,CD KN2A,F9,PAK3,PI4KA,POLD1,REG1A,PKMYT1,YWHAQ,REXO2,IL23A,ANTXR1,MMAB ,SERPINA2P                    |
| Regulation of p38-alpha and p38-beta                                                  | TAB1,RAC1,OSM,TRAF6,DUSP8,DUSP1,AGFG1,IRF6,MAP3K3,MAP2K3,MAP2K6,RAL A,MAP2K4,MAP3K12,RIPK1,DLK1,DUSP10,DUSP16,CCM2,RPAIN,MTG1                                                                                                           |
| regulation of bad phosphorylation                                                     | PIK3R1,PIK3CA,CSF2RB,IL3RA,IL3,BAD,YWHAH,PRKAR2B,PRKACB,PRKAR2A,PRKAR1 B,PRKAR1A,PRKACG,BAX,BCL2L1,IGF1,IGF1R,BCL2,KIT,KITLG,ADCY1,PDPK1,AKT1,C AMP,PIK3CB,PIK3CD,PIK3CG,YWHAQ,CHAMP1                                                   |

|                                                                               |                                                                                                                                                                                                                                                                                                                                                                                                                                                                                                                                                                                                                                                                |
|-------------------------------------------------------------------------------|----------------------------------------------------------------------------------------------------------------------------------------------------------------------------------------------------------------------------------------------------------------------------------------------------------------------------------------------------------------------------------------------------------------------------------------------------------------------------------------------------------------------------------------------------------------------------------------------------------------------------------------------------------------|
| Signaling events mediated by Hepatocyte Growth Factor Receptor (c-Met)        | APC,ARF6,GRB2,SOS1,RHOA,GAB1,EIF4E,MTOR,DEPTOR,CRKL,EPH2,EPH3,EPH4,EPH5,EPH6,EPH7,EPH8,EPH9,EPH10,EPH11,EPH12,EPH13,EPH14,EPH15,EPH16,EPH17,EPH18,EPH19,EPH20,EPH21,EPH22,EPH23,EPH24,EPH25,EPH26,EPH27,EPH28,EPH29,EPH30,EPH31,EPH32,EPH33,EPH34,EPH35,EPH36,EPH37,EPH38,EPH39,EPH40,EPH41,EPH42,EPH43,EPH44,EPH45,EPH46,EPH47,EPH48,EPH49,EPH50,EPH51,EPH52,EPH53,EPH54,EPH55,EPH56,EPH57,EPH58,EPH59,EPH60,EPH61,EPH62,EPH63,EPH64,EPH65,EPH66,EPH67,EPH68,EPH69,EPH70,EPH71,EPH72,EPH73,EPH74,EPH75,EPH76,EPH77,EPH78,EPH79,EPH80,EPH81,EPH82,EPH83,EPH84,EPH85,EPH86,EPH87,EPH88,EPH89,EPH90,EPH91,EPH92,EPH93,EPH94,EPH95,EPH96,EPH97,EPH98,EPH99,EPH100 |
| Paxillin-independent events mediated by a4b1 and a4b7                         | RHOA,CDC42,GIT1,CRKL,CBL,CRK,DOCK1,PIK3R1,RAC1,EPO,EPOR,VCAM1,MADCAM1,ARF6,CD44,SRC,PAK1,JAK2,ADRA1D,PIK3CA,PIK3CB,PIK3CD,PIK3CG,PKN1,PTK2,TIMP1,EPX,THOC1,MTG1,SIRPA                                                                                                                                                                                                                                                                                                                                                                                                                                                                                          |
| mapkinase signaling pathway                                                   | MAP3K7,MAP3K14,HRAS,FOS,MAP2K4,STAT1,RAC1,MAX,CEBPA,MAPK14,MYC,CREB1,SP1,ATF2,GCK,MAP4K3,MAP4K4,MAP4K5,MAP4K1,RPS6KA1,MAP2K3,MAP2K7,MAP2K2,MAP2K1,MAP3K11,MAP3K1,CHUK,IKBKB,MAP2K6,MAP3K4,MAP3K12,PAK1,PAK2,JUN,RAF1,MAPK9,MAPK10,MAP3K13,MAPK7,MAP2K5,MAP3K2,MAP3K3,MAP3K8,ELK1,MAPK11,MAPK13,ARAF,GDNF,MAP3K5,PKN1,PKN2,MAPK1,MAPK3,MAPK8,PSG1,MAP4K2,MAPK12,NR2C2,AIMP2,GRAP2,KCNH4,KCNH8,DAND5                                                                                                                                                                                                                                                             |
| cell to cell adhesion signaling                                               | PTPN11,PECAM1,CTNNA1,ACTA1,VCL,CTNNA1,CSK,BCAR1,PXN,PTK2,SRC,PXDN                                                                                                                                                                                                                                                                                                                                                                                                                                                                                                                                                                                              |
| pdgf signaling pathway                                                        | PIK3R1,PIK3CA,FOS,JUN,STAT3,STAT1,SRF,ELK1,PDGFRA,PDGFA,GRB2,SOS1,SHC1,MAP2K1,MAP2K4,RAF1,MAPK8,MAP3K1,MAPK3,JAK1,PLCG1,CSNK2A1,HRAS,RASA1,CSNK2A2,DAG1,FOSB,JUNB,JUND,PIK3CB,PIK3CD,PIK3CG,SYNGAP1,KCNH4,DYT10,MTG1,PRRT2,KCNH8                                                                                                                                                                                                                                                                                                                                                                                                                               |
| Aurora B signaling                                                            | CDC42,RAC1,PAK1,INCEP,KLHL9,CUL3,KLHL13,RHOA,TACC1,EVI5,NSUN2,NPM1,SMC4,SMC2,BUB1,CENPA,MYLK,PEBP1,PPP2R4,PKN1,RASA1,PRRC2A,KIF23,KIF20A,NDC80,KIF2C,KIAA1549L,CDCA8,RAB33B,MYLK2,MYLK3,MTG1,CRYGEP                                                                                                                                                                                                                                                                                                                                                                                                                                                            |
| transcriptional activation of dbpb from mrna                                  | PDGFB,PROCR,YBX1                                                                                                                                                                                                                                                                                                                                                                                                                                                                                                                                                                                                                                               |
| role of ran in mitotic spindle regulation                                     | RANGAP1,RANBP2,RANBP1,NUMA1,KIF15,TPX2,KPNB1,KPNA2,RAN,RCC1,AURKA,MTG1                                                                                                                                                                                                                                                                                                                                                                                                                                                                                                                                                                                         |
| IL8- and CXCR1-mediated signaling events                                      | GNAI2,GNB1,GNG2,IL8,CXCR1,DNM1,CBL,GNA15,GNA14,PDK1,AKT1,PLD1,ADRBK1,DAG1,PDPK1,PIK3CA,PIK3CB,PIK3CD,PIK3CG,PRKCSH,RAB5A,THOC1,MTG1,SIRPA                                                                                                                                                                                                                                                                                                                                                                                                                                                                                                                      |
| internal ribosome entry pathway                                               | EIF4G2,EIF4E,EIF4G3,EIF4G1,EIF4A1,PTBP1,EIF3A,PTBP2                                                                                                                                                                                                                                                                                                                                                                                                                                                                                                                                                                                                            |
| mechanism of acetaminophen activity and toxicity                              | NR1I3,COX3,CYP2E1,CYP3A,CYP1A2,PTGS1,COX2,CASR,CXADR,CYP3A4,PRKAR1A,PTGS2,SPG7,TRIM13,CXADRP1                                                                                                                                                                                                                                                                                                                                                                                                                                                                                                                                                                  |
| Alpha-synuclein signaling                                                     | UCHL1,BAD,PLD1,PLD2,TH,SYK,GRK5,MAOB,CSNK2A1,PTK2B,FKBP1A,FKBP1AP1,FKBP1AP2,FKBP1AP3,FKBP1AP4,HSPA1A,PPP2R4,PRKCSH,SLC6A3,UBE2L3,STUB1,PARK7,DYT10,PRRT2                                                                                                                                                                                                                                                                                                                                                                                                                                                                                                       |
| Role of Calcineurin-dependent NFAT signaling in lymphocytes                   | NRON,YWHAQ,BCL2,BAX,CHP1,CABIN1,MEF2D,NUP214,RAN,BAD,PIM1,KRIT1,MAP3K8,CREBBP,CSNK2A1,DAG1,RCAN1,EIF4E,FKBP1A,FKBP1AP1,FKBP1AP2,FKBP1AP3,FKBP1AP4,NR4A1,KPNA2,MAP3K1,NFATC2,NFATC3,MAPK3,MAPK8,MAPK9,OPN1LW,LONP1,AKAP5,RCAN2,FKBP8,CHORDC1,CROT,PAG1,PCBP4                                                                                                                                                                                                                                                                                                                                                                                                    |
| il-10 anti-inflammatory signaling pathway                                     | IL10RA,IL10RB,JAK1,IL10,BLVRA,MAP3K5,IL1A,TNF,IL6,MAP2K6,HMOX1,MAPK14,C2                                                                                                                                                                                                                                                                                                                                                                                                                                                                                                                                                                                       |
| Ephrin B reverse signaling                                                    | RHOA,CDC42,EPHB4,PIK3R1,RAC1,NCK2,RGS3,TIAM1,CXCR4,PAK1,DNM1,ADRA1D,PIK3CA,PIK3CB,PIK3CD,PIK3CG,PKN1,MAPK8,MAP2K4,MAP3K7,NR2C2,THOC1,MTG1,SIRPA                                                                                                                                                                                                                                                                                                                                                                                                                                                                                                                |
| insulin signaling pathway                                                     | PIK3R1,PIK3CA,SOS1,GRB2,PTPN11,INS,INSR,SHC1,SLC2A14,IRS1,HRAS,PIK3CB,PIK3CD,PIK3CG                                                                                                                                                                                                                                                                                                                                                                                                                                                                                                                                                                            |
| Proteoglycan syndecan-mediated signaling events                               |                                                                                                                                                                                                                                                                                                                                                                                                                                                                                                                                                                                                                                                                |
| polyadenylation of mrna                                                       | PAPOLA,CSTF1,CSTF2,CSTF3,PABPN1,ACPP,REG3A,ASAP2,MRPS30,PDAP1,TUSC2,WDT1,ASAP1,ATP8A2                                                                                                                                                                                                                                                                                                                                                                                                                                                                                                                                                                          |
| roles of beta arrestin dependent recruitment of src kinases in gpcr signaling | GNB1,GNGT1,ARRB1,GNAS,SRC,HCK,MAPK3,MAPK1,ADRBK1,MAP2K2,MAP2K1,DNM1,RAF1,HRAS,FZD4,LPAR3,LGR6,MTG1,MRGPRX3,MRGPRX4,GPR151,OXER1,GPRC6A,MRGPRX1,VN1R17P,GPR166P                                                                                                                                                                                                                                                                                                                                                                                                                                                                                                 |
| EphrinB-EPHB pathway                                                          | EPHB1,EPHB3,EPHB2,EPHB4                                                                                                                                                                                                                                                                                                                                                                                                                                                                                                                                                                                                                                        |
| Signaling mediated by p38-alpha and p38-beta                                  | MAPKAPK3,MAPKAPK2,ATF2,GDI1,HBP1,MITF,USF1,CEBPB,NOS2,ATF6,KRT8,KRT19,MEF2A,MEF2C,EIF4E,ATF1,CREB1,DDIT3,DEFB4A,EIF4EBP1,ELK4,GDNF,HSPB1,HSPB2,PSAP,PTGS2,PTPRH,RAB5A,SLC9A1,TP53,MAPKAPK5,MKNK1,PPARGC1A,NANOS2                                                                                                                                                                                                                                                                                                                                                                                                                                               |

|                                                                              |                                                                                                                                                                                                                                                                                                                                                                                     |
|------------------------------------------------------------------------------|-------------------------------------------------------------------------------------------------------------------------------------------------------------------------------------------------------------------------------------------------------------------------------------------------------------------------------------------------------------------------------------|
| antisense pathway                                                            | SFPQ,MATR3,NONO,ADAR,IGFBP7                                                                                                                                                                                                                                                                                                                                                         |
| role of mef2d in t-cell apoptosis                                            | HLA-DRB1,HLA-DRA,LCK,CD3D,CD3G,CD3E,CD4,ZAP70,PPP3CA,PPP3CB,PPP3CC,CABIN1,CAPN2,CAPNS1,MEF2D,HDAC2,HDAC1,EP300,PLCG1,PTPRC,NR4A1,FYN,LAT,KRIT1,CD247,DAG1,TRA,TRB,HDAC9,ORC3,DYT10,SPNS1,PRRT2,TARP                                                                                                                                                                                 |
| LKB1 signaling events                                                        | MTOR,TSC1,TSC2,SMAD4,CDC37,SIK3,SIK1,TFF1,MYC,CREB1,MST4,CRTC2,MAP2,BRSK1,MARK4,SIK2,BRSK2,MARK2,ETV4,STK11,TP53,PPFIA1,METAP2,LIAS,CAB39,CENPJ,MLST8,AKT1S1,STK11IP                                                                                                                                                                                                                |
| pertussis toxin-insensitive ccr5 signaling in macrophage                     | CCR5,GNAQ,FOS,JUN,CXCR4,CCL4,CXCL12,PLCG1,DAG1,FOSB,ITIH4,JUNB,JUND,CCL2                                                                                                                                                                                                                                                                                                            |
| PLK3 signaling events                                                        | ATM,CDC25C,PLK3,TP53,CHEK2                                                                                                                                                                                                                                                                                                                                                          |
| granzyme a mediated apoptosis pathway                                        | DFFB,DFFA,APEX1,NME1,HMGB2,SET,ANP32A,GZMB,CREBBP,PRF1,GZMA,CASP3,CAD,RMRP,ZNF395,IRG1                                                                                                                                                                                                                                                                                              |
| tnfr2 signaling pathway                                                      | RIPK1,TANK,TRAF2,TRAF3,TRAF1,TNFRSF1B,LTA,RELA,NFKBIA,MAP3K14,MAP3K1,TNFAIP3,AGFG1,ARHGEF7,RPAIN                                                                                                                                                                                                                                                                                    |
| nitric oxide signaling pathway                                               | DLG4,NOS1,PPP3CA,PPP3CC,PPP3CB,PRKAR2B,PRKACB,PRKAR2A,PRKAR1B,PRKAR1A,PRKACG,GRIN1,KRIT1,LLGL1,DYT10,PRRT2,GPRIN1,NANOS1                                                                                                                                                                                                                                                            |
| fas signaling pathway (cd95)                                                 | FADD,CASP10,FASLG,DAXX,FAS,FAF1,CFLAR,RIPK2,CASP8,PRKDC,MAP3K1,PTPN13,MAP2K4,MAPK8,MAP3K7,CASP3,RB1,PAK1,PAK2,CASP7,FASN,PKN1,PKN2,ARHGEF28                                                                                                                                                                                                                                         |
| cdc25 and chk1 regulatory pathway in response to dna damage                  | YWHAH,RASGRF1,MYT1,ATM,CHEK1,WEE1,CDK1,CDC25C,POLD1,PKMYT1,YWHAQ,PIK3R1,PIK3CA,GNAI1,GNGT1,GNB1,ITGAV,ITGB3,PDGFRA,PDGFA,GRB2,SOS1,SHC1,ASAHI,RAF1,RAC1,SPHK1,MAPK3,MAP2K2,MAP2K1,ADCY1,PTK2,PDPK1,PIK3C2G,HRAS,AKT1,SRC,MAPK1,S1PR1,PIK3CB,PIK3CD,PIK3CG,MBTPS1,HEXIM1,SNW1,PLEKHM2,DYT10,INPP5K,SPHKAP,MTG1,PRRT2                                                                 |
| phospholipids as signalling intermediaries                                   | EGFR,EGF,SOS1,GRB2,GNAI1,GAB1,GNAI3,PIP5K1C,PAK1,STAT1,STAT3,SRC,DAG1,PIK3CA,PIK3CB,PIK3CD,PIK3CG,PKN1,PTK2,PTPN1,PTPN6,PTPN11,RASA1,NR0B2,WASL,THOC1,MTG1,PIGU,SIRPA                                                                                                                                                                                                               |
| EGF receptor (ErbB1) signaling pathway                                       |                                                                                                                                                                                                                                                                                                                                                                                     |
| neuroregulin receptor degradation protein-1 controls erb3 receptor recycling | ERBB3,RNF41,UBE2D1                                                                                                                                                                                                                                                                                                                                                                  |
| mtor signaling pathway                                                       | EIF4E,EIF4EBP1,PIK3R1,PIK3CA,RPS6,EIF4A1,EIF4G1,EIF4B,GH1,IRS1,TSC1,TSC2,FKBP1A,GHR,PKD2,PDPK1,RHEB,RPS6KB1,PTEN,MKNK1,AKT1,PPP2R5D,FKBP1AP1,FKBP1AP2,FKBP1AP3,FKBP1AP4,MTOR,PIK3CB,PIK3CD,PIK3CG,RHEBP1,EIF3A,GGH,MTG1                                                                                                                                                             |
| sonic hedgehog receptor ptc1 regulates cell cycle                            | CCNB1,SHH,CCNH,CDK7,MNAT1,XPO1,RASGRF1,DDR1,CDK1,POLD1,PTCH1                                                                                                                                                                                                                                                                                                                        |
| IL2 signaling events mediated by PI3K                                        | RHOA,CDC42,JAK3,GAB2,LCK,SOS1,PIK3R1,GRB2,IL2,JAK1,TERT,MTOR,AKT1,RAC1,RELA,SMS,MYB,CAMP,E2F1,PAK1,MYC,BCL2,KRIT1,DAG1,FOXO3,GCLC,PIK3CA,PIK3CB,PIK3CD,PIK3CG,PKN1,PTPN11,SHC1,SMPD1,UGCG,EIF3A,THOC1,RAI1,MTG1,SIRPA,H19,CHAMP1                                                                                                                                                    |
| cell cycle: g1/s check point                                                 | CDK4,CDK6,CCND1,TFDP1,E2F1,CDK2,CCNE1,SMAD4,SMAD3,RB1,HDAC1,ABL1,TGFB1,DHFR,CCNA1,GSK3B,ATR,ATM,CDC25A,TP53,CDKN2B,CDKN2A,CDKN1A,CDKN1B,SKP2,CDK1,MTTP,PAK3,POLD1,TKT,HDAC9,ANTXR1,MMAB,SERPINA2P                                                                                                                                                                                   |
| srebp control of lipid synthesis                                             | SCAP,MBTPS2,MBTPS1,LDLR,HMGCS1,SH2D2A                                                                                                                                                                                                                                                                                                                                               |
| effects of calcineurin in keratinocyte differentiation                       | MARCKS,PPP3CA,PPP3CC,PPP3CB,SP3,SP1,CDKN1A,GNAQ,PLCG1,AZF1,KRIT1,DAG1,PAK3,PSG1,DYT10,PRRT2,DAND5                                                                                                                                                                                                                                                                                   |
| intrinsic prothrombin activation pathway                                     | PROS1,PROC,FGA,FGB,FGG,COL4A1,COL4A3,COL4A2,COL4A5,COL4A6,COL4A4,F2R,F9,F11,F12,F5,F8,F10,SERPING1,KNG1,ZFH3,PCID2,FAM110A,ZNF160                                                                                                                                                                                                                                                   |
| metabolism of anandamide an endogenous cannabinoid                           | CNR1,CNR2,PLD2,BAAT,PLD3,PLD1,FAAH,PRKCSH,PCDHA@,PCDHA6,PCDHA4,FA2H,PAK1,NGF,CDC42,RHOA,PIK3R1,PSEN1,NCSTN,APH1A,PSENEN,APH1B,E2F1,DIABLO,LINGO1,TRAF6,BEX1,RAC1,AKT1,BAD,MYD88,MMP7,FURIN,APAF1,ARHGDI2A,GTF2H1,IRAK1,NTF4,NTRK1,NTRK2,NTRK3,PIK3CA,PIK3CB,PIK3CD,PIK3CG,PKN1,SHC1,SMPD2,ADAM17,TP53,IKBKG,RIPK2,MAGED1,THOC1,BCL2L11,NGFRAP1,DCTN4,ARHGEF28,RTN4R,BEX2,MTG1,SIRPA |
| p75(NTR)-mediated signaling                                                  |                                                                                                                                                                                                                                                                                                                                                                                     |

|                                                                     |                                                                                                                                                                                                                                                                                                                                                                                                       |
|---------------------------------------------------------------------|-------------------------------------------------------------------------------------------------------------------------------------------------------------------------------------------------------------------------------------------------------------------------------------------------------------------------------------------------------------------------------------------------------|
| the co-stimulatory signal during t-cell activation                  | PIK3R1,PIK3CA,CTLA4,CD80,CD3E,CD3D,CD3G,CD28,CD86,HLA-DRB1,HLA-DRA,ICOS,ICOSLG,PTPN11,ITK,GRB2,LCK,CD247,PIK3CB,PIK3CD,PIK3CG,TRA,TRB,CD274,TARP                                                                                                                                                                                                                                                      |
| fc epsilon receptor i signaling in mast cells                       | PIK3R1,PIK3CA,LYN,FCER1G,SYK,MS4A2,FCER1A,GRB2,SOS1,SHC1,PAK2,RAF1,JUN,MAPK8,MAP2K4,FOS,ELK1,MAPK1,MAP2K7,MAP3K1,PLA2G1B,PLCG1,MAPK3,MAP2K2,MAP2K1,HRAS,BTK,VAV1,MS4A1,DAG1,PIK3CB,PIK3CD,PIK3CG,PRKCB,PKN2,KCNH4,KCNH8                                                                                                                                                                               |
| ccr3 signaling in eosinophils                                       | GNAS,CCL11,CCR3,GNB1,GNGT1,GNAQ,LIMK1,CFL1,PLCB1,DECR1,MAP2K1,MAPK3,MAPK1,ROCK2,RHOA,RAF1,PIK3C2G,PTK2,HRAS,MYL2,PPP1R12B,DAG1,ROS1,VPS72,DYT10,PRRT2                                                                                                                                                                                                                                                 |
| Signaling events mediated by TCPTP                                  | STAT5A,PDGFRB,STAT1,PIAS1,EGFR,EGF,STAT3,STAT5B,CSF1R,CSF1,SOS1,GRB2,GAB1,RAB4A,STAT6,JAK1,JAK3,LMAN1,EIF2A,SRC,ATR,ADRA1D,CREBBP,EIF2S1,EIF4E,KDR,PIK3CA,PIK3CB,PIK3CD,PIK3CG,PKLR,PRB3,EIF2AK2,PTPN11,OPN1LW,SHC1,THOC1,PAG1,PCBP4,ANTXR1,MTG1,PIGU,SIRPA,MMAB,SERPINA2P                                                                                                                            |
| Syndecan-1-mediated signaling events                                | FGFR4,FGF1,FGF9,FGF16,FGF6,FGF8,FGF19,FGF17,FGF18,FGF2,FGF4,FGF3,FGF10,FGF5,FGF23,MET,HGF,CASK,TGFB1,MMP1,HPSE,MMP7,BSG,FGF13,IL6,CCL5,SOS1,RNMT                                                                                                                                                                                                                                                      |
| degradation of the rar and rxr by the proteasome                    | RXRA,RARA,RAB40B                                                                                                                                                                                                                                                                                                                                                                                      |
| S1P5 pathway                                                        | RAC1,PAK1,CDC42,RHOA,PKN1,MBTPS1,S1PR5,MTG1                                                                                                                                                                                                                                                                                                                                                           |
| phosphoinositides and their downstream targets                      | VAV2,LYN,GRASP,BTK,GTF3A,ARF1,GSK3A,PRKCZ,PRKCE,RPS6KB1,RAB5A,GSK3B,EEA1,PLCG1,RAC1,PDPK1,AKT1,BAD,PIP,DAG1,BPNT1,ARF1P1                                                                                                                                                                                                                                                                              |
| Regulation of Telomerase                                            | JUNB,FOS,FOSB,JUND,JUN,TERT,IRF1,MTOR,AKT1,HDAC2,SP1,SP3,BLM,POT1,TPP1,ATM,MYC,SMAD3,TGFB1,HUS1,RAD1,WRN,MAX,C2,SIN3A,RBBP7,SAP18,SIN3B,HDAC1,SAP30,RBBP4,PINX1,PARP2,RAD50,EGFR,EGF,E2F1,WT1,PIF1,IL2,NFX1,AMPD1,AZF1,CDKN1B,ERCC4,FOSL2,XRCC6,HNRNPC,MXD1,MRE11A,NBN,PSG1,RAD9A,RAP1A,RRAD,TERF1,TERF2,XRCC5,FOSL1,TBPL1,TECR,RNASEH2A,PTGES3,YWHAQ,SMG6,SMG5,TINF2,TERF2IP,NLRP2,DCLRE1B,ACD,DAND5 |
| C-MYC pathway                                                       | MAX,MYC,HBP1,TAF10,TAF12,TAF9,TRRAP,PPP2CA,AXIN1,PIN1,PAK2,SKP2,USP28,CDKN2A,KAT2A,PKN2,ZBTB17,SUPT3H,RUVBL1,SUPT7L,KAT5,RUVBL2,PDZD2,SPTLC3                                                                                                                                                                                                                                                          |
| TGF-beta receptor signaling                                         | TGFB2,PPP2R2A,TGFB1,SOS1,GRB2,SMAD4,SMAD7,PPP1CA,STRAP,BAMBI,OCLN,SMURF1,SMAD3,PML,SMAD2,SMURF2,DAB2,DAXX,XIAP,EIF2A,AXIN1,WWP1,RHOA,PDK1,CAV1,CTGF,PPP2CB,PPP2CA,ITCH,EIF2S1,FKBP1A,FKBP1AP1,FKBP1AP2,FKBP1AP3,FKBP1AP4,PDPK1,SHC1,SPTBN1,MAP3K7,TGFB1,NR2C2,ZFYVE9,TGFB1P1,ZFYVE16,TRAP1,YAP1,NEDD4L,PPP1R15A,PARD6A,RNF111,SRFBP1,DACT2                                                            |
| il 2 signaling pathway                                              | JAK3,IL2RG,IL2,IL2RB,IL2RA,JAK1,SYK,LCK,GRB2,SOS1,SHC1,HRAS,STAT5A,STAT5B                                                                                                                                                                                                                                                                                                                             |
| mets affect on macrophage differentiation                           | ETS2,ETS1,CSF1R,CSF1,FOS,JUN,RBL1,E2F4,RBL2,E2F1,ETV3,NCOR2,HDAC2,DDX20,HRAS,FOSB,JUNB,JUND,NOLC1,RAB3GAP1,MTG1                                                                                                                                                                                                                                                                                       |
| Sphingosine 1-phosphate (S1P) pathway                               | ABCC1,ATF6B,S1PR1,S1PR3,S1PR4,MBTPS1,SPHK1,S1PR2,GNA13,S1PR5                                                                                                                                                                                                                                                                                                                                          |
| control of gene expression by vitamin d receptor                    | CREBBP,EP300,NCOA2,NCOA3,NCOA1,TSC2,VDR,TOP2B,BAZ1B,SMARCE1,SMARCC2,SMARCC1,SMARCD1,RXRA,ARID1A,SMARCA4,ACTL6A,CHAF1A,SUPT16H,COPS2,HDAC1,NCOR1,CARM1,GRIP1,PRMT1,CYP27B1,EIF4E,OCA2,MED1,OPN1LW,SRC,TAF9,B3GALNT1,KAT2B,HDAC9,SNW1,PAG1,PCBP4,LGALS12                                                                                                                                                |
| IL2-mediated signaling events                                       | RAC1,PAK1,CDC42,STAT5A,SOCS3,LCK,SOCS2,JAK1,JAK3,GAB2,SOS1,PIK3R1,IL2,GRB2,SOCS1,CISH,RHOA,FYN,STAT1,SYK,STAT3,FOS,BCL2,RAF1,MYC,MAPKAPK2,JUN,CDK2,PTK2B,PIK3CA,PIK3CB,PIK3CD,PIK3CG,PPP2R4,PRB3,PKN1,PTPN11,RASA1,SHC1,STAT5B,THOC1,IKZF3,MTG1,SIRPA                                                                                                                                                 |
| IL8- and CXCR2-mediated signaling events                            | IL8,CXCR2,GNAI2,GNB1,GNG2,DNM1,CBL,RAB11A,VASP,GNA15,ELMO1,DOCK2,GN A14,PPP2CA,PPP2R1A,RAC2,PLD2,AKT1,PKD1,DAG1,PDPK1,PIK3CA,PIK3CB,PIK3CD,PIK3CG,RAB5A,TFAP2A,RAB7A,THOC1,MTG1,SIRPA,RAB7B                                                                                                                                                                                                           |
| repression of pain sensation by the transcriptional regulator dream | OPRK1,CREB1,FOS,JUN,PRKAR2B,PRKACB,PRKAR2A,PRKAR1B,PRKAR1A,PRKACG,RP S6KA3,POLR2A,MAPK3,CREM,KCNIP3                                                                                                                                                                                                                                                                                                   |
| Thromboxane A2 receptor signaling                                   | RAC1,CDC42,GNG2,GNB1,GNAI2,TGM2,RHOA,ROCK1,EGFR,EGF,AKT1,SYK,DNM1,V CAM1,ICAM1,PAK1,DAG1,DECR1,DSP,PIK3CA,PIK3CB,PIK3CD,PIK3CG,PKN1,PTGDR,PTGDS,PTGIR,SDHB,SELE,SRPR,IKBK,SLC9A3R1,THOC1,HPGDS,IGKV1D-39,MTG1,ATPIF1,SIRPA                                                                                                                                                                            |

|                                                            |                                                                                                                                                                                                                                     |
|------------------------------------------------------------|-------------------------------------------------------------------------------------------------------------------------------------------------------------------------------------------------------------------------------------|
| sumoylation by ranbp2 regulates transcriptional repression | HDAC6,SUMO1,HDAC9,RAN,MDM2,HDAC4,HDAC1,RANBP2,NUP62,NUP153,NUP214,NUP210,PIAS1,PIAS2,NPC1,MTG1                                                                                                                                      |
| er associated degradation (erad) pathway                   | SAE1,FBXO2,CUL1,UBE2I,RBX1,SEC61A1,CANX,EDEM1,GANAB,SKP1,MAN1A1,RIT1,MOGS,UGGT1                                                                                                                                                     |
| tnfr1 signaling pathway                                    | MADD,TRADD,TNF,RIPK1,TRAF2,BIRC3,TNFRSF1A,CRADD,LMNB1,LMNA,LMNB2,BAG4,FADD,CASP8,CASP3,MAP2K4,CASP2,ETFA,ETFB,ETFDH,AGFG1,TANK,SPANXC,RAIN                                                                                          |
| Canonical Wnt signaling pathway                            | NKD2,FZD5,WNT3A,AXIN1,LRP6,KLHL12,CUL3,APC,RANBP3,PIP5K1B,PIP4K2A,DVL1,GSTP1,SERPINA1,PROC,DVL1P1                                                                                                                                   |
| mechanism of protein import into the nucleus               | RANGAP1,RANBP1,RANBP2,KPNA2,RAN,NUTF2,KPNB1,NUP62,NUP153,NUP214,NUP210,RCC1,NPC1,MTG1                                                                                                                                               |
| Class I PI3K signaling events mediated by Akt              | KPNA1,BAD,MTOR,RICTOR,YWHAZ,AKT2,PKD1,SRC,AKT1,RAF1,AKT3,CDKN1B,MAP3K5,PDPK1,PRB3,SLC2A4,TBC1D4,MLST8,MAPKAP1                                                                                                                       |
| IL27-mediated signaling events                             | STAT5A,STAT1,STAT4,TYK2,JAK2,IL12B,IL12A,IL27RA,EBI3,IL27,JAK1,STAT2,STAT3,IL18,TGFB1,GATA3,IL2,IL6,IL6ST,IL17A,NM,LRPPRC,IL17D,C19orf10                                                                                            |
| EPO signaling pathway                                      | EPOR,EPO,JAK2,SOCS3,LYN,SOS1,GRB2,STAT1,GAB1,PIK3R1,CRKL,CBL,IRS2,TEC,VAV2,TRPC2,TRPC6,BTK,BCL2,HRAS,RAP1A,BCL2L1,DAG1,RAPGEF1,INPP5D,MAPK8,PTPN6,PTPN11,SHC1,STAT5A,STAT5B,TIMP1,TOC,NR4A3,EPX,NROB2,SH2B3,MTG1,PIGU               |
| Plasma membrane estrogen receptor signaling.1              | CDC42,RAC1,PAK1,GRB2,SOS1,SRC,PELP1,RHOA,GNB1,GN2,PIK3R1,IGF1,AKT1,ROCK2,ATF6B,DAG1,DBT,DECR1,PIK3CA,PIK3CB,PIK3CD,PIK3CG,PKN1,SNORA62,THOC1,GNA13,SNORD12C,IGKV1D-39,MTG1,SIRPA                                                    |
| Notch signaling pathway                                    | SKP1,CUL1,NUMB,ITCH,RBPJ,HDAC1,DNM1,CNTN1,NCSTN,APH1A,PSENNEN,APH1B,DNER,YY1,DLK1,MYCBP,ENO1,ADAM12,FURIN,DTX1,CBL,IL4,MARK2,NOTCH4,EP515,NOTCH1,PTCRA,GATA3,ADAM10,MIB1,SKP2,MYC,KITLG,RBBP8,NEURL,SPEN,KDM1A,FBXW7,LNX1,MTG1      |
| IL1-mediated signaling events                              | RELA,IL1RAP,PIK3R1,IL1R1,TAB1,TAB2,TRAF6,IRAK4,MYD88,IL1R2,IL1RN,TOLLIP,TICAM2,JUN,GT2H1,IRAK1,MAP3K3,PIK3CA,PIK3CB,PIK3CD,PIK3CG,MAPK8,MAP2K6,MAP3K7,NR2C2,UBE2N,UBE2V1,IKBKG,THOC1,IRAK3,ERC1,DCTN4,SIRPA                         |
| Circadian rhythm pathway                                   | ATR,CHEK1,TIMELESS,PER1,NONO,CRY2,CLOCK,WDR5,NPAS2,DEC1,NR1D1,AQP1,ARNTL,DECR1,BHLHE40,ANTXR1,PGAP3,MMAB,SERPINA2P                                                                                                                  |
| p38 mapk signaling pathway                                 | CDC42,MAP3K5,MAX,ELK1,HMG1,HSPB1,STAT1,MYC,MAPKAPK2,MAPKAPK5,MAP3K1,PLA2G1B,CREB1,MKNK1,ATF2,MAP2K4,RAC1,DDIT3,NR2C2,RPS6KA5,HRAS,MAP2K6,MAP3K9,MAPK14,GDNF,KCNH4,KCNH8                                                             |
| apoptotic signaling in response to dna damage              | APAF1,CASP9,BCL2,BAX,BCL2L1,BID,ATM,CYCS,BAD,AKT1,TP53,CASP7,CASP6,CASP3                                                                                                                                                            |
| PLK2 and PLK4 events                                       | PLK4,PLK2                                                                                                                                                                                                                           |
| Endothelins                                                | RHOA,CDC42,HRAS,RAC1,CRK,SRC,JUN,FOS,PAK1,AKT1,JAK2,MMP1,COL3A1,COL1A2,TRPC6,RAF1,APC,DAG1,EDN1,EDN2,EDN3,EDNRA,EDNRB,PTK2B,GLUL,PKN1,MAPK8,SLC9A1,SLC9A3,CYSLTR1,CYSLTR2,MTG1                                                      |
| il 6 signaling pathway                                     | IL6R,LRPPRC,SOS1,GRB2,PTPN11,IL6,SHC1,CEBPB,STAT3,HRAS,IL6ST,NMGAB1,PIK3R1,CD2AP,CBL,NRP1,NCK1,NRP2,AKT1,HIF1A,PKD1,KRIT1,DAG1,DECR1,FLT1,NELL1,NELL2,PDPK1,PGF,PIK3CA,PIK3CB,PIK3CD,PIK3CG,PTPN11,RASA1,THOC1,IGKV1D-39,PIGU,SIRPA |
| VEGFR1 specific signals.1                                  | GABRA4,GABRA5,GABRA6,GABRA2,GABRA1,GABRA3,PRKCE,GPX1,ROS1,SOD1,ATP8A2                                                                                                                                                               |
| cardiac protection against ros                             | BCAR1,ZYX,TNS1,PXN,VCL,ITGB1,CSK,CAPN1,ITGA1,ACTA1,PTK2,TLN1,CAV1,FYN,GRB2,SOS1,SHC1,MAPK8,LRPAP1,NOLC1,RAPGEF1,MLC1,CRKL,HRAS,BCR,RHOA,SRC,ROCK1,PPP1R12B,ALPP,ATHS,SLPI,PXDN,CCL27,MMRN1,ATRNL1,PDLIM3,NAT10,ASRGL1               |
| integrin signaling pathway                                 | CDK2,SRC,EGR1,ROCK1,RHOA,RAC1,RHOC,PRB3,PTP4A1,PTP4A2,PTP4A3                                                                                                                                                                        |
| Signaling events mediated by PRL                           | CDK5,CDK5R1,ELK1,RIT1,SRF,EGR1,TRPV1,EHD4,FOS,MEF2C,CREB1,MAPKAPK2,RAF1,BRAF,MAPK7,MAP2K1,MAP2K5,RAP1A,RIT2,RPS6KA5,MAP3K2,KCNH4,RUSC1,TERF2IP,BCL11B,MTG1,KCNH8                                                                    |
| Trk receptor signaling mediated by the MAPK pathway        |                                                                                                                                                                                                                                     |



|                                                                       |                                                                                                                                                                                                                                                                                                                                                                                                                                                                                                    |
|-----------------------------------------------------------------------|----------------------------------------------------------------------------------------------------------------------------------------------------------------------------------------------------------------------------------------------------------------------------------------------------------------------------------------------------------------------------------------------------------------------------------------------------------------------------------------------------|
| Neurotrophic factor-mediated Trk receptor signaling                   | SH2B1,RHOA,RHOG,DOCK1,ELMO1,GAB2,STAT3,FAIM,SOS1,GRB2,RAC1,PIK3R1,TIAM1,MATK,GAB1,CDC42,RIT1,KIDINS220,CRKL,PAK1,RASGRF1,EHD4,DNM1,NGF,RAPGEF1,GTF2H1,LRP2,NTF4,NTRK1,NTRK2,NTRK3,PIK3CA,PIK3CB,PIK3CD,PIK3CG,PKN1,MAP2K1,PTPN11,RAP1A,RASA1,RIT2,SHC1,DNAJA3,MAGED1,ARHGAP32,THOC1,RGS19,GIPC1,MCF2L,NEDD4L,DCTN4,TERF2IP,BCL11B,MTG1,PIGU,COL26A1,SIRPA,UBE2A,VHL,HIF1A,CREB1,EP300,COP55,ARNT,JUN,ASPH,NOS3,EPO,EDN1,LDHA,P4HB,DBT,HSP90AA1,HSP90AA2,SNORA62,TIMP1,VEGFA,EPX,SNORD12C,ATP8A2,NA |
| hypoxia-inducible factor in the cardiovascular system                 | NOS3,MIA3                                                                                                                                                                                                                                                                                                                                                                                                                                                                                          |
| IGF1 pathway                                                          | IRS2,CRK,HRAS,IRS1,IGF1,SOS1,GRB2,NCK2,GRB10,YWHAZ,BAD,PIK3R1,RAF1,PDK1,AKT1,CRKL,IARS,NCK1,PDPK1,PIK3CA,PIK3CB,PIK3CD,PIK3CG,PTK2,PTPN1,PTPN11,SHC1,THOC1,GNB2L1,YWHAQ,MTG1,SIRPA                                                                                                                                                                                                                                                                                                                 |
| brca1 dependent ub ligase activity                                    | FANCD2,BRCA1,BARD1,FANCF,FANCA,FANCC,FANCG                                                                                                                                                                                                                                                                                                                                                                                                                                                         |
| Class IB PI3K non-lipid kinase events                                 | PDE3B,CAMP,PIK3CA,PIK3CB,PIK3CD,PIK3CG,MAPK1,MAP2K1,THOC1,SIRPA,CHAMP1                                                                                                                                                                                                                                                                                                                                                                                                                             |
| Caspase cascade in apoptosis                                          | BAX,DFFB,DIABLO,PIDD,MADD,TRADD,TRAF2,BCL2,SREBF1,LIMK1,SATB1,BID,GAS2,PARP1,SLK,APAF1,BIRC3,DFFA,ETFA,ETFB,ETFDH,FYN,AGFG1,MAP3K1,NUMA1,PTK2,RIPK1,CRADD,TANK,RPAIN                                                                                                                                                                                                                                                                                                                               |
| epo signaling pathway                                                 | EPO,EPOR,GRB2,SOS1,SHC1,JAK2,PLCG1,PTPN6,HRAS,STAT5A,STAT5B,TIMP1,EPX                                                                                                                                                                                                                                                                                                                                                                                                                              |
| Validated transcriptional targets of AP1 family members Fra1 and Fra2 | JUNB,FOS,FOSB,JUND,JUN,USF2,ATF4,SP1,DMTF1,CCL2,HMOX1,COL1A2,LIF,IL8,IL6,MMP1,MGP,CDKN2A,FOSL2,NFATC2,PLAU,PSG1,FOSL1,RNASEH2A,TXLNG,PRAP1,DAND5                                                                                                                                                                                                                                                                                                                                                   |
| EPHB forward signaling                                                | RHOA,EPHB4,EPHB3,KALRN,EPHB2,EPHB1,RAC1,PIK3R1,SRC,HRAS,GRB7,GRB2,CDC42,SYNJ1,NCK1,TF,PAK1,RRAS,MAP4K4,DNM1,F3,GRIA1,PIK3CA,PIK3CB,PIK3CD,PIK3CG,PKN1,MAP2K1,PTK2,RAP1A,RASA1,WASL,THOC1,TERF2IP,MTG1,SIRPA                                                                                                                                                                                                                                                                                        |
| mcalpain and friends in cell motility                                 | PXN,ACTA1,PTK2,TLN1,ITGB1,ITGA1,CAPN2,CAPNS1,MLC1,PRKAR2B,PRKACB,PRKAR2A,PRKAR1B,PRKAR1A,PRKACG,GRB2,SOS1,SHC1,CAPN1,EGF,EGFR,CAST,MYLK,RAC1,MAPK1,MAPK3,MAP2K2,MAP2K1,HRAS,EZR,PXDN,CD3EAP,MMRN1,ERC2,MTG1                                                                                                                                                                                                                                                                                        |
| role of ppar-gamma coactivators in obesity and thermogenesis          | CREBBP,PPARG,PPARGC1A,EP300,RXRA,NCOA1,NCOA2,LPL,DOCK3,EIF4E,LCP1,PEBP1,PKD1,MED1,PPBP,OPN1LW,SRC,PAG1,PCBP4                                                                                                                                                                                                                                                                                                                                                                                       |
| Angiopietin receptor Tie2-mediated signaling                          | RHOA,CDC42,STAT5A,NCK1,PIK3R1,RAC1,AGTR1,CRK,PAK1,GRB2,GRB14,RELA,GRB7,FYN,FGF2,FOXO1,ETS1,ELK1,ELF1,FES,BMX,AKT1,ADRA1D,ANGPT1,ANGPT2,VPS51,DECR1,FGF13,PIK3CA,PIK3CB,PIK3CD,PIK3CG,PKN1,MAPK8,PTK2,PTPN11,RASA1,ROS1,SHC1,STAT5B,TEK,TM7SF2,THOC1,KCNH4,IGKV1D-39,TNIP2,ELOF1,MTG1,KCNH8,SIRPA                                                                                                                                                                                                   |
| tumor suppressor arf inhibits ribosomal biogenesis                    | PIK3R1,PIK3CA,TP53,NFKBIB,UBE2A,POLR1A,POLR1C,POLR1B,POLR1D,RAC1,TBX2,TWIST1,E2F1,ABL1,MYC,ATM,HSPA1A,RB1,AKT1,MDM2,CDKN2A,DBT,HSP90AA1,HSP90AA2,PIK3CB,PIK3CD,PIK3CG,SNORA62,SNORD12C,DNAJB1P1                                                                                                                                                                                                                                                                                                    |
| signaling pathway from g-protein families                             | GNAI1,GNGT1,GNB1,GNAS,PPP3CA,PPP3CC,PPP3CB,PRKAR2B,PRKACB,PRKAR2A,PRKAR1B,PRKAR1A,PRKACG,MAP2K1,RAF1,GNAQ,HRAS,ELK1,MAPK3,RPS6KA3,CREB1,PLCG1,CAMP,ASAH1,KRIT1,DAG1,KCNH4,DYT10,ATP8A2,PRRT2,KCNH8,CHAMP1                                                                                                                                                                                                                                                                                          |
| phospholipase c delta in phospholipid associated cell signaling       | ADRA1B,PLCD1,TGM2,DLC1,DAG1,DYNLL1,DLEC1                                                                                                                                                                                                                                                                                                                                                                                                                                                           |
| Hypoxic and oxygen homeostasis regulation of HIF-1alpha               | OS9,TCEB1,TCEB2,ARNT,HIF1A,CUL2,VHL,RBX1,TRIM23,CASR,CDKN2A,PPP1R8,TP53,NAA10,GNB2L1,COP55,HIF3A,MIA3                                                                                                                                                                                                                                                                                                                                                                                              |
| hemoglobins chaperone                                                 | HBB,ALAS1,ALAS2,ALAD,HMBS,UROS,UROD,FECH,CPOX,GATA1,HBA1,HBA2,SCN2A,IGKV1D-39,AHSP,KRT124P,KRT123P                                                                                                                                                                                                                                                                                                                                                                                                 |
| sprouty regulation of tyrosine kinase signals                         | SRC,EGFR,EGF,GRB2,SOS1,SHC1,SH3KBP1,MAPK1,MAPK3,PTPRB,CBL,RAF1,MAP2K2,MAP2K1,HRAS,RASA1,ENG,SYNGAP1,MTG1                                                                                                                                                                                                                                                                                                                                                                                           |
| Signaling by Aurora kinases                                           |                                                                                                                                                                                                                                                                                                                                                                                                                                                                                                    |
| Regulation of CDC42 activity                                          | RAC1,RHOA,PAK1,APC,CDC42,GIT1,DOCK11,DOCK9,ARHGAP10,ARHGAP17,FGD1,RALBP1,DOCK10,VAV3,VAV2,ARHGEF9,DOCK6,NME1,ARHGAP1,ARHGDI,LRP2,MCF2,PKN1,PROC,RMRP,FARP2,MCF2L,DNMBP,NGEF,ARHGAP21,REPS1,MTG1,ARHGEF25,SPATA13                                                                                                                                                                                                                                                                                   |
| rna polymerase iii transcription                                      | GTF3C3,NR3C1,BDP1,GTF3C1,GTF3C5,BRF1,GTF3C4,SSB,ZFP36L1,PTPN18                                                                                                                                                                                                                                                                                                                                                                                                                                     |

|                                                                             |                                                                                                                                                                                                                                                                                                                                                 |
|-----------------------------------------------------------------------------|-------------------------------------------------------------------------------------------------------------------------------------------------------------------------------------------------------------------------------------------------------------------------------------------------------------------------------------------------|
| Posttranslational regulation of adherens junction stability and disassembly | FGFR4,FGF1,FGF9,FGF16,FGF6,FGF8,FGF19,FGF17,FGF18,FGF2,FGF4,RHOA,FGF23,NGF,FGF3,CDC42,FGF10,FGF5,EGF,EGFR,ARF6,IGF2,RET,GDNF,RAC1,HRAS,IQGAP1,ADAM10,FYN,HGS,MEP1B,NME1,RIN2,TIAM1,SNX1,PAK1,MMP7,Src,ADRA1D,CREBBP,CTNND1,EIF4E,FGF13,NTF4,NTRK1,NTRK2,NTRK3,PKN1,PTPN1,PTPN6,RAB5A,OPN1LW,RMRP,RAB7A,NROB2,PAG1,PCBP4,CBL1,CABLES1,MTG1,RAB7B |
| Ceramide signaling pathway                                                  | BAG4,RELA,MADD,TRADD,TRAF2,FADD,PDGFA,BAX,BAD,SPHK2,IGF1,EGF,MYC,RB1,BCL2,RAF1,AKT1,MAP4K4,EIF2A,RAX,BID,BIRC3,EIF2S1,ETFA,ETFB,ETFDH,AGFG1,MAP3K1,PAWR,PKLR,MAPK1,MAPK3,MAPK8,MAP2K1,MAP2K2,EIF2AK2,MAP2K4,NSMAF,PRKRA,RIPK1,CRADD,KSR1,F2RL3,AIFM1,TANK,CNKSR1,CNTRL,RPAIN,GRDX,PPWAR4                                                        |
| calcium signaling by hbx of hepatitis b virus                               | SRC,PTK2B,CREB1,FOS,JUN,GRB2,SOS1,SHC1,CSNK2A1,MAP2K1,RAF1,MAPK3,HRAS                                                                                                                                                                                                                                                                           |
| ifn gamma signaling pathway                                                 | ,KRIT1,CSNK2A2,FOSB,JUNB,JUND,LAMTOR5,MTG1                                                                                                                                                                                                                                                                                                      |
| sodd/tnfr1 signaling pathway                                                | JAK1,IFNGR1,JAK2,IFNG,STAT1                                                                                                                                                                                                                                                                                                                     |
| tnf/stress related signaling                                                | BAG4,TNF,MADD,TRADD,RIPK1,TRAF2,BIRC3,CRADD,ETFA,ETFB,ETFDH,AGFG1,TANK,RPAIN                                                                                                                                                                                                                                                                    |
| attenuation of gpcr signaling                                               | TRADD,RIPK1,TANK,TRAF2,CASP2,TNFRSF1A,TNF,CRADD,BAG4,CHUK,IKKBK,IKBKG,ATF1,JUN,MAPK8,MAP4K2,MAP4K4,MAP3K1,MAPK14,GDNF,AGFG1,MAP2K3,MAP2K6,MAP2K7,MAP2K4,RPAIN                                                                                                                                                                                   |
| ALK2 signaling events                                                       | GNAS,GNGT1,GNB1,PRKAR2B,PRKACB,PRKAR2A,PRKAR1B,PRKAR1A,PRKACG,ARRB1,GRK4,NTSE,NTS,FZD4,LPAR3,DYT10,LGR6,PRRT2,MRGPRX3,MRGPRX4,GPR151,OXER1,GPRC6A,MRGPRX1,VN1R17P,GPR166P                                                                                                                                                                       |
| ifn alpha signaling pathway                                                 | SMAD4,BMPR2,BMP7,TLX2,ACVR1,AMH,AMHR2,FKBP1A,FKBP1AP1,FKBP1AP2,FKBP1AP3,FKBP1AP4                                                                                                                                                                                                                                                                |
| Syndecan-4-mediated signaling events                                        | IFNAR2,IFNA1,IFNAR1,JAK1,TYK2,IFNB1,STAT2,STAT3,STAT1                                                                                                                                                                                                                                                                                           |
| growth hormone signaling pathway                                            | RHOA,CDC42,CXCR4,CXCL12,FZD7,RAC1,ADAM12,FGF2,FGFR1,TFPI,PAK1,ADRA1D,FGF13,PKN1,PTK2,CCL5,GIPC1,TNFRSF13B,MTG1                                                                                                                                                                                                                                  |
| inhibition of cellular proliferation by gleevec                             | JAK2,GHR,PIK3R1,PIK3CA,GH1,SRF,INSR,INS,GRB2,SOS1,SHC1,CISH,PLCG1,PTPN6,RPS6KA1,IRS1,SLC2A14,DAG1,HNF4A,PIK3CB,PIK3CD,PIK3CG,STAT5A,STAT5B,HNF1A,GGH,DYT10,PRRT2                                                                                                                                                                                |
| rac1 cell motility signaling pathway                                        | PIK3R1,PIK3CA,GRB2,SOS1,MAP2K1,MAPK8,RAF1,MAP2K4,BCL2,MAP3K1,JUN,JAK2,CRKL,MAPK3,HRAS,BCR,MYC,AKT1,STAT1,FOS,PIK3CB,PIK3CD,PIK3CG,STAT5A,STAT5B                                                                                                                                                                                                 |
| RXR and RAR heterodimerization with other nuclear receptor                  | PIK3R1,PIK3CA,CDK5R1,CDK5,PPP1R12B,LIMK1,MAP3K1,RPS6KB1,WASF1,PAK1,PLD1,MYL2,CFL1,PDGFRA,ARFIP2,RAC1,MYLK,FCN2,GCHFR,IL12A,PIK3CB,PIK3CD,PIK3CG,PKN1,PRKCSH,RASA1,VPS72,RGS6,CADM1,UPK3B                                                                                                                                                        |
| downregulated of mta-3 in er-negative breast tumors                         | VDR,RARS,BCL2,MED1,TH,TGFB1,ABCA1,CYP27B1,NR4A1,PPARA,MBD4,NCOR2,NR1H4,HEATR6,FAM120B                                                                                                                                                                                                                                                           |
| role of beta-arrestins in the activation and targeting of map kinases       | ESR1,MTA3,HDAC1,MBD3,HSPB1,PDZK1,GREB1,CTSD,ALDOA,CDH1,GAPDH,SNAI1,HDAC9,FZR1,DPEP3                                                                                                                                                                                                                                                             |
| wnt lrp6 signalling                                                         | GNAS,GNGT1,GNB1,ARRB1,RAF1,MAPK1,MAP2K1,MAP2K2,MAPK3,DNM1,ADRBK1,FZD4,LPAR3,LGR6,MTG1,MRGPRX3,MRGPRX4,GPR151,OXER1,GPRC6A,MRGPRX1,VN1R17P,GPR166P                                                                                                                                                                                               |
| atm signaling pathway                                                       | FZD1,LRP6,KREMEN2,DKK2,DKK1                                                                                                                                                                                                                                                                                                                     |
| anthrax toxin mechanism of action                                           | BRCA1,RBBP8,MDM2,TP53,RELA,NFKBIA,ATM,TREX1,ATR,JUN,RPA1,TP73,CHEK2,CHHEK1,GADD45A,MAPK8,RAD51,ABL1,ATRIP,ARHGEF7,POLR1A,ANTXR1,MMAB,SERPINA2P                                                                                                                                                                                                  |
| Nongenotropic Androgen signaling                                            | MAP2K2,MAP2K1,CAMP,AMY2A,EPB42,PRH1,BLOC1S6,ATP8A2,CHAMP1                                                                                                                                                                                                                                                                                       |
| Alternative NF-kappaB pathway                                               | AR,GNG2,GNB1,Src,PELP1,PIK3R1,HRAS,SHBG,RAF1,AKT1,FOS,CREB1,AKR1B1,AREG,DAG1,GNRH1,HSPG2,PIK3CA,PIK3CB,PIK3CD,PIK3CG,MAPK1,PTK2,THOC1,MTG1,SIRPA                                                                                                                                                                                                |
| FoxO family signaling                                                       | RELB,MAP3K14,MAP4K4                                                                                                                                                                                                                                                                                                                             |
| Polo-like kinase signaling events in the cell cycle                         | FOXO1,RAN,SIRT1,SKP2,FOXO4,G6PC,PLK1,BCL6,CAT,FOXO6,CDK2,FASLG,GADD45A,AKT1,USP7,SGK1,CDKN1B,CREBBP,EIF4E,FOXO3,MSMB,MST1,RALA,RBL2,OPN1LW,SOD2,ZFAND5,KAT2B,NOLC1,BCL2L11,GLYAT,YWHAQ,RAB3GAP1,PAG1,PCBP4,TPMPRSS13,LMLN,MTG1                                                                                                                  |
|                                                                             | PLK3,PLK2,PLK1,PLK4                                                                                                                                                                                                                                                                                                                             |

|                                                                                |                                                                                                                                                                                                                                                                                                                                                                                                                                        |
|--------------------------------------------------------------------------------|----------------------------------------------------------------------------------------------------------------------------------------------------------------------------------------------------------------------------------------------------------------------------------------------------------------------------------------------------------------------------------------------------------------------------------------|
| akap95 role in mitosis and chromosome dynamics                                 | CCNB1,PRKACB,PRKAR2B,PRKAG1,PRKAR2A,PRKACG,AKAP8,DDX5,PPP2R5D,CDK1,POLD1,NPY4R,NCAPD2,CEP250                                                                                                                                                                                                                                                                                                                                           |
| btg family proteins and cell cycle regulation                                  | CHAF1B,CHAF1A,TP53,HOXB9,CCND1,RB1,BTG2,BTG1,PRMT1,PRB3,CNOT8,CNOT7                                                                                                                                                                                                                                                                                                                                                                    |
| Thrombin/protease-activated receptor (PAR) pathway                             |                                                                                                                                                                                                                                                                                                                                                                                                                                        |
| trka receptor signaling pathway                                                | PIK3R1,PIK3CA,NTRK1,GRB2,SOS1,SHC1,AKT1,PDPK1,HRAS,PLCG1,NGF,DAG1,PIK3CB,PIK3CD,PIK3CG,DYT10,PRRT2                                                                                                                                                                                                                                                                                                                                     |
| signal dependent regulation of myogenesis by corepressor mitr                  | MYOD1,HDAC9,YWHAH,MEF2C,KRIT1,CAMK1,YWHAQ                                                                                                                                                                                                                                                                                                                                                                                              |
| the igf-1 receptor and longevity                                               | PIK3R1,PIK3CA,IRS1,IGF1R,IGF1,GRB2,SOS1,SHC1,CAT,HRAS,PDPK1,AKT1,FOXO3,PIK3CB,PIK3CD,PIK3CG,ROS1,SOD1,GLYAT,MTG1                                                                                                                                                                                                                                                                                                                       |
| gamma-aminobutyric acid receptor life cycle pathway                            | UBQLN1,GABRA2,GABRA6,GABRA4,GABRA1,GABRA3,GABRA5,NSF,GABARAP,GPH1,SRC,DNM1,UBE3A,UBE2A,UBA1                                                                                                                                                                                                                                                                                                                                            |
| toll-like receptor pathway                                                     | IRAK1,TLR9,MYD88,TLR2,CD14,TLR6,EIF2AK2,TLR4,TIRAP,LY96,TOLLIP,TLR3,FOS,JUN,MAP3K7,RELA,NFKBIA,TLR7,CHUK,IKKBK,IKBKG,PGLYRP1,PPARA,ELK1,MAP3K1,MAP2K6,MAPK14,MAPK8,MAP3K14,MAP2K4,TRAF6,MAP2K3,TAB1,TAB2,FOSB,IRF6,JUNB,JUND,NDUFA2,PKLR,SPG7,NR2C2,ARHGEF7,KCNH4,ECSIT,KCNH8                                                                                                                                                          |
| IL3-mediated signaling events                                                  | STAT5A,CSF2RB,IL3RA,IL3,JAK2,CEBPB,GAB2,GRB2,PIK3R1,YWHAZ,HDAC1,CISH,YWHAG,SRP9,OSM,PIM1,ID1,INPP5D,PIK3CA,PIK3CB,PIK3CD,PIK3CG,PTPN11,SHC1,STAT5B,KSR1,LONP1,THOC1,CNKS1R,CCM2,SIRPA                                                                                                                                                                                                                                                  |
| ionomycin and phorbol ester signaling pathway                                  | P2RY2,PRKCA,PLCG1,DAG1,PRKCB                                                                                                                                                                                                                                                                                                                                                                                                           |
| erk1/erk2 mapk signaling pathway                                               | NGFR,GRB2,SOS1,SHC1,RAF1,PTPRR,ELK1,STAT3,TERT,PPP2R5D,MYC,MKNK2,MKNK1,RPS6KA1,MAP2K2,MAP2K1,SRC,HRAS,MAPK3,MAPK1,NGF,RPS6KA5,KCNH4,KCNH8                                                                                                                                                                                                                                                                                              |
| p53 pathway                                                                    | PPP2R4,RPL11,RPL23,MDM2,RPL5,DAXX,USP7,CDK2,NEDD8,SKP2,PIN1,YY1,STRAP,PRMT5,FBXO11,AKT1,DYRK2,ATR,E4F1,CSE1L,HIPK2,SMYD2,ATM,MDM4,CDKN2A,CDKN3,CREBBP,EIF4E,PPM1A,PPP2CA,PRB3,OPN1LW,RPL17,MRPL23,TP53,UBE2D1,PPM1D,KAT2B,HUWE1,TRIM28,KAT5,PPP1R13L,RASSF1,CHEK2,PDZD2,RCHY1,PAG1,PCBP4,SETD8P1,TP53AIP1,RFWD2,SETD7,ANTXR1,CARD16,SRFBP1,MMAB,SETD8,SERPINA2P                                                                        |
| opposing roles of aif in apoptosis and cell survival                           | BCL2L1,PARP1,AIFM1                                                                                                                                                                                                                                                                                                                                                                                                                     |
| E-cadherin signaling in keratinocytes                                          | CDC42,PIK3R1,RAC1,RHOA,EGFR,PAK1,FYN,SRC,AJUBA,VASP,CASR,PIP5K1A,ADRA1D,DAG1,PIK3CA,PIK3CB,PIK3CD,PIK3CG,PKN1,THOC1,MTG1,SIRPA                                                                                                                                                                                                                                                                                                         |
| Calcineurin-regulated NFAT-dependent transcription in lymphocytes              | JUN,FOS,FOXP3,JUNB,EGR1,PPARG,EGR4,IRF4,MAF,CD40LG,CDK4,PTPRK,GBP3,DGKA,CTLA4,IL8,IL5,EGR2,FASLG,EGR3,E2F1,ITCH,GATA3,IL2,IL4,KRIT1,IL3,NFATC2,PTGS2,PTPN1,SLC3A2,TLE4,FOSL1,SLC7A5,IKZF1,RNASEH2A,ATL1,RNF128                                                                                                                                                                                                                         |
| Signaling events mediated by HDAC Class I                                      | NUP153,NUP62,NUP210,NUP214,STAT3,HDAC1,HDAC2,RBBP7,RBBP4,YY1,SAP30,CHD4,MBD3,CHD3,GATA1,MTA2,SIN3A,SAP18,SIN3B,HDAC3,GATA2,SUMO1,RANGAP1,RANBP2,SMAD7,RAN,MAX,RELA,MBD3L2,MBD2,PRMT5,NCOR1,HDAC8,PPARG,SMURF1,AMPD1,CREBBP,EIF4E,FKBP3,MXD1,NPC1,OPN1LW,TFCP2,NR2C1,UBE2I,CDC6,HIST2H2AA3,HIST2H2AC,HIST2H2BE,HIST1H4F,HIST2H4A,TNFSF14,TNFRSF14,KAT2B,PAG1,PCBP4,HRH4,DPEP2,DPEP3,WDR77,TAS1R2,DEPDC7,MTG1,TXNRD3,RLN3,HIST2H3C,ZFPM1 |
| Signaling events regulated by Ret tyrosine kinase                              | RHOA,CDC42,GDNF,GAB1,GRB2,CRK,IRS1,RAP1A,SOS1,FRS2,RAC1,PIK3R1,SHANK3,DOK4,DOK6,HRAS,GRB7,NCK1,DOK5,GRB10,IRS2,JUN,SRC,CREB1,DOK1,PAK1,ART4,PIK3CA,PIK3CB,PIK3CD,PIK3CG,PKN1,MAPK8,PTK2,PTPN11,RASA1,RET,SHC1,THOC1,MTG1,PIGU,SIRPA                                                                                                                                                                                                    |
| Nephrin/Neph1 signaling in the kidney podocyte                                 | RHOA,CDC42,GRB2,CD2AP,RAC1,JUN,TRPC6,PAK1,FYN,BAD,AKT1,DAG1,F2RL2,PIK3CA,PIK3CB,PIK3CD,PIK3CG,PKN1,MAP2K4,TJP1,WASL,THOC1,PARD6A,KIRREL,PARD3,MTG1,SIRPA                                                                                                                                                                                                                                                                               |
| agrin in postsynaptic differentiation                                          | ACTA1,DMD,CTTN,SRC,PTK2,ITGB1,PXN,GIT2,ITGA1,DAG1,EGFR,MUSK,DVL1,RAPSN,UTRN,MAPK8,MAPK3,SP1,CDC42,JUN,RAC1,MAPK1,PKLR,PSG1,PXDN,DVL1P1,MTG1,DAND5                                                                                                                                                                                                                                                                                      |
| angiotensin ii mediated activation of jnk pathway via pyk2 dependent signaling | SRC,PTK2B,BCAR1,CRKL,AGT,GNAQ,AGTR1,ATF2,JUN,GRB2,SOS1,SHC1,RAF1,MAP2K4,RAC1,FOS,EGFR,MAPK1,MAPK3,ELK1,MAPK8,MAP3K1,PLCG1,PAK1,MAP2K2,MAP2K1,HRAS,AGXT,KRIT1,DAG1,GDNF,PKN1,KCNH4,DYT10,MTG1,PRRT2,KCNH8                                                                                                                                                                                                                               |

|                                                                                      |                                                                                                                                                                                                                                                                                                                                                                                                                                                                                                                                                                                                                                                                                |
|--------------------------------------------------------------------------------------|--------------------------------------------------------------------------------------------------------------------------------------------------------------------------------------------------------------------------------------------------------------------------------------------------------------------------------------------------------------------------------------------------------------------------------------------------------------------------------------------------------------------------------------------------------------------------------------------------------------------------------------------------------------------------------|
| cyclins and cell cycle regulation                                                    | TFDP1,E2F1,CCNB1,CDK2,CCNE1,CCNA1,CCNH,CDK7,RB1,CCND3,CDK6,RBL1,CDK4,CCND2,CCND1,CDKN2D,CDKN2C,CDKN1A,CDKN2A,CDKN2B,CDKN1B,CDC25A,CDK1,PAK3,POLD1                                                                                                                                                                                                                                                                                                                                                                                                                                                                                                                              |
| d4gdi signaling pathway                                                              | RHOA,ARHGDI1,JUN,CASP1,CASP3,ARHGAP5,RHO                                                                                                                                                                                                                                                                                                                                                                                                                                                                                                                                                                                                                                       |
| ALK1 signaling events                                                                | TGFB2,ACVR2A,INHBA,TGFB1,PPP1CA,TGFB1,BMP2,SMAD4,TGFB3,ACTR2,CAV1,TLX2,SMAD7,ID1,ACVR1,ACVRL1,CSNK2B,FKBP1A,FKBP1AP1,FKBP1AP2,FKBP1AP3,FKBP1AP4,GDF2,SLPI                                                                                                                                                                                                                                                                                                                                                                                                                                                                                                                      |
| ErbB2/ErbB3 signaling events                                                         | SOS1,GRB2,ERBB3,ERBB2,STAT3,DOCK7,MTOR,FOS,CHRNA1,RAF1,BAD,CHRNE,AKT1,NFATC4,USP8,CAMP,SRC,JAK2,JUN,PIK3CA,PIK3CB,PIK3CD,PIK3CG,MAPK8,PTPN11,SHC1,THOC1,RNF41,MTG1,SIRPA,CHAMP1                                                                                                                                                                                                                                                                                                                                                                                                                                                                                                |
| akt signaling pathway                                                                | PIK3R1,PIK3CA,AKT1,YWHAH,RELA,NFKBIA,GHR,GH1,PPP2CA,FASLG,CASP9,CHUK,PDPK1,BAD,HSP90AA1,HSP90AA2,PIK3CB,PIK3CD,PIK3CG,GGH,ARHGEF7,YWHAQ                                                                                                                                                                                                                                                                                                                                                                                                                                                                                                                                        |
| Trk receptor signaling mediated by PI3K and PLC-gamma                                | NGF,STAT5A,GAB1,SOS1,PIK3R1,GRB2,TRPV1,EGR1,CREB1,SRC,BAD,PDK1,AKT1,TRPC3,DAG1,EPB41L1,FOXO3,NTF4,NTRK1,NTRK2,NTRK3,PDPK1,PIK3CA,PIK3CB,PIK3CD,PIK3CG,SHC1,THOC1,MTG1,AGAP2,PIGU,SIRPA                                                                                                                                                                                                                                                                                                                                                                                                                                                                                         |
| stat3 signaling pathway                                                              | STAT3,TYK2,MAPK1,MAPK3,MTOR                                                                                                                                                                                                                                                                                                                                                                                                                                                                                                                                                                                                                                                    |
| role of mal in rho-mediated activation of srf                                        | SRF,MAL,ACTA1,RAC1,RHOA,RAF1,MAPK8,MAPK1,MAP2K2,MAP2K1,MAP4K2,LIMK1,DIAPH1,ROCK1,HRAS,MAP3K1,MAPK3,CDC42,CD8A,HNF4A,HNF1A,MKL1                                                                                                                                                                                                                                                                                                                                                                                                                                                                                                                                                 |
| Nectin adhesion pathway                                                              | RHOA,CDC42,IQGAP1,RAC1,PIK3R1,PDGFRB,CLDN1,CRK,VAV2,PTPRM,SRC,PAK1,PIP5K1C,ADRA1D,RAPGEF1,PIK3CA,PIK3CB,PIK3CD,PIK3CG,PKN1,PTK2,RAP1A,FARP2,THOC1,PVRL3,TERF2IP,MTG1,SIRPA                                                                                                                                                                                                                                                                                                                                                                                                                                                                                                     |
| the 41bb-dependent immune response                                                   | TNFRSF9,TRAF2,TNFSF9,RELA,IL4,IL2,IFNG,JUN,ATF2,MAP3K5,MAPK14,GDNF,MAP2K3,MAP2K6,TANK                                                                                                                                                                                                                                                                                                                                                                                                                                                                                                                                                                                          |
| Effects of Botulinum toxin                                                           | STX1A,VAMP2,STXB1,RAB3GAP2,UNC13B,RIMS1,SNAP25,CHRNA1,FGFR3                                                                                                                                                                                                                                                                                                                                                                                                                                                                                                                                                                                                                    |
| ATF-2 transcription factor network                                                   | JUN,FOS,ATF2,JUND,BRCA1,JD2,CREB1,JUNB,HES1,CDK4,DUSP5,RB1,NOS2,ATF3,COL24A1,CSR2,BCL2,IL6,IL23A,TH,GADD45A,PDGFRA,DUSP8,ARG1,SOC3,ACHE,CUL3,IL8,DDIT3,DUSP1,GDNF,PLAU,MAPK8,MAPK9,SELE,C21orf33,HRK,KAT5,RNASEH2A,RUVBL2,PPARGC1A,DUSP10,TINAGL1,PRAP1,NANOS2                                                                                                                                                                                                                                                                                                                                                                                                                 |
| Calcium signaling in the CD4+ TCR pathway                                            | JUN,FOS,CHP1,JUNB,CABIN1,CD40LG,FASLG,IL4,IL2,KRIT1,RCAN1,FKBP1A,FKBP1AP1,FKBP1AP2,FKBP1AP3,FKBP1AP4,IL3,PTGS2,FOSL1,AKAP5,RCAN2,RNASEH2A,CHORDC1                                                                                                                                                                                                                                                                                                                                                                                                                                                                                                                              |
| erk and pi-3 kinase are necessary for collagen binding in corneal epithelia          | PFN1,DIAPH1,PIK3R1,PIK3CA,BCAR1,ZYX,TNS1,PXN,VCL,ITGB1,CSK,CAPN1,ITGA1,ACTA1,PTK2,TLN1,GSN,RHOA,PLCG1,MLC1,ARHGAP5,SRC,MAPK3,MAPK1,MYLK,ROCK1,MAP2K1,ALPP,ATHS,DAG1,PIK3CB,PIK3CD,PIK3CG,PRF1,SLPI,PXDN,CCL27,MMRN1,ATRNL1,PDLIM3,NAT10,ASRGL1                                                                                                                                                                                                                                                                                                                                                                                                                                 |
| the prc2 complex sets long-term gene silencing through modification of histone tails | RBBP4,RBBP7,YY1,EED,SUZ12,EZH2,HDAC2,HDAC1,CBX4,RING1,PHC1,PRC1,BMI1,LMNB1,LMNA,LMNB2,APAF1,CASP9,DFFB,DFFA,BIRC3,BIRC2,CASP2,CASP6,PRF1,CASP8,CASP4,PARP1,SREBF1,CASP1,GZMB,CASP10,ARHGDI1,CASP3,CASP7,XIAP,CAD,ZNF395,SPANXC,IRG1                                                                                                                                                                                                                                                                                                                                                                                                                                            |
| caspase cascade in apoptosis                                                         |                                                                                                                                                                                                                                                                                                                                                                                                                                                                                                                                                                                                                                                                                |
| cyclin e destruction pathway                                                         | CCNE1,TFDP1,E2F1,CDK2,RB1,CDC34,CUL1,FBXW7,SKP1                                                                                                                                                                                                                                                                                                                                                                                                                                                                                                                                                                                                                                |
| ErbB1 downstream signaling                                                           | FOS,RHOA,STAT1,STAT3,ABI1,RALA,MTOR,RICTOR,RIN1,ARPC3,ARPC4,ARPC5,ARPC1B,ARPC2,RAC1,EGF,EGFR,YWHAZ,KSR1,RAF1,BRAF,PPP2R1A,PPP2CA,PPP2R2A,SRF,ELK1,EP8,SOS1,CDC42,BAD,ARF4,SRA1,AKT1,GAB1,RALGDS,CREB1,ATF1,EGR1,ZFP36,MEF2C,SMAD1,SRC,ATF2,JUN,PAK1,IQGAP1,PLD1,GRB2,PLD2,PDK1,VAV2,KRIT1,DAG1,DUSP1,DUSP6,F2RL2,GARS,GDNF,IL8,MAP3K1,NAP1L1,PEBP1,PDPK1,PIK3CA,PIK3CB,PIK3CD,PIK3CG,PKN1,PRKCSH,MAPK7,MAP2K1,MAP2K2,MAP2K5,RAB5A,RPS6KA3,MAP2K4,SLC9A1,SOX9,WASL,SH2D2A,NAPSA,USP6NL,THOC1,ACTR3,ACTR2,WASF2,CNKSR1,BAIAP2,CHERP,MAP3K2,NCKAP1,YWHAQ,CYFIP1,KCNH4,ANGPTL2,C9orf156,PAR3,PAR4,AICDA,SCAF1,MLST8,AZI2,MAPKAP1,NAA25,MTG1,PIGU,KCNH8,SIRPA,APOBEC3A,HEPACAM,TAB3 |
| trefoil factors initiate mucosal healing                                             | PIK3R1,PIK3CA,RELA,APAF1,CASP9,ERBB2,EGFR,NFKBIA,GRB2,SOS1,SHC1,GHR,GH1,RAF1,CASP7,CASP6,CASP3,MUC2,CYCS,RPS6KA1,MAPK1,MAPK3,RHOA,MAP2K2,MAP2K1,CTNBN1,PDPK1,HRAS,AKT1,BAD,PIK3CB,PIK3CD,PIK3CG,GGH,ARHGEF7,MTG1                                                                                                                                                                                                                                                                                                                                                                                                                                                               |
| e2f1 destruction pathway                                                             | CCNA1,CDK2,TFDP1,E2F1,CCNE1,RB1,CDC34,SKP2,CUL1,SKP1                                                                                                                                                                                                                                                                                                                                                                                                                                                                                                                                                                                                                           |

|                                                                   |                                                                                                                                                                                                                                                                                                                                                                                                                                                                                                                                    |
|-------------------------------------------------------------------|------------------------------------------------------------------------------------------------------------------------------------------------------------------------------------------------------------------------------------------------------------------------------------------------------------------------------------------------------------------------------------------------------------------------------------------------------------------------------------------------------------------------------------|
| eicosanoid metabolism                                             | PTGER3,PTGER4,CYSLTR1,PTGFR,PTGER2,CYSLTR2,PTGIR,PTGER1,MPO,TBXA2R,PTGIS,PTGES,TBXAS1,ALOX5AP,PLA2G1B,CYP2J2,PLCB1,ALOX5,COX8A,DAG1,FPR1,PTGDS,COX5A,HPGDS                                                                                                                                                                                                                                                                                                                                                                         |
| FOXA1 transcription factor network                                | JUNB,FOS,JUND,FOSB,JUN,AR,FOXA1,SP1,BRCA1,SFTPD,SHH,FOXA2,C4BPB,SOD1,COL18A1,AP1B1,PRDM15,NDUFV3,PISD,ATP5J,TFF1,CEBPB,DSCAM,NRIP1,GCG,XBP1,APOB,AKR1B1,CLK3,AREG,CDKN1B,CREBBP,CYP2C18,DBT,EIF4E,FOSL2,NFIC,NKX3-1,SERPINA1,PLAG1,PROS1,PSG1,OPN1LW,SNORA62,SCGB1A1,XBP1P1,FOSL1,NCOA3,NPEPPS,SFI1,RNASEH2A,ERAL1,SNORD12C,PSAT1,PAG1,PCBP4,ANIB1,DAND5                                                                                                                                                                           |
| IL8-mediated signaling events                                     | IL8                                                                                                                                                                                                                                                                                                                                                                                                                                                                                                                                |
| transcription regulation by methyltransferase of carm1            | CREBBP,EP300,PRKAR2B,PRKACB,PRKAR2A,PRKAR1B,PRKAR1A,PRKACG,RARA,RXR A,CARM1,NCOA3,CREB1,BCL2,SST,EIF4E,OPN1LW,RAB40B,PAG1,PCBP4                                                                                                                                                                                                                                                                                                                                                                                                    |
| cxcr4 signaling pathway                                           | PIK3R1,PIK3CA,GNAQ,CXCR4,CXCL12,GNB1,GNGT1,GNAI1,HRAS,PIK3C2G,PLCG1,DAG1,ITIH4,PIK3CB,PIK3CD,PIK3CG                                                                                                                                                                                                                                                                                                                                                                                                                                |
| p38 signaling mediated by MAPKAP kinases                          | RAF1,YWHAZ,TSC2,MAPKAPK2,TCF3,MAPKAPK3,CDC25B,CREB1,SRF,LSP1,TH,ALOX5,ETV1,HSPB1,HSPB2,PRRC2A,KIAA1549L,TCF7L1,CRYGEP                                                                                                                                                                                                                                                                                                                                                                                                              |
| Signaling events mediated by focal adhesion kinase                | CDC42,RRAS,GRB7,PAK1,RAC1,PIK3R1,SRC,SOS1,GRB2,RHOA,ELMO1,CRK,DOCK1,ASAP1,KLF8,JUN,ETS1,BRAF,BMX,ROCK2,RAF1,ADRA1D,RAPGEF1,MMP14,MYLK,NCK1,PIK3CA,PIK3CB,PIK3CD,PIK3CG,PKLR,PKN1,MAPK1,MAP2K1,PTK2,RAP1A,RASA1,MAP2K4,WASL,THOC1,PTPN21,ARHGAP26,MAPK8IP3,TERF2IP,MYLK2,MYLK3,MTG1,SIRPA                                                                                                                                                                                                                                           |
| pten dependent cell cycle arrest and apoptosis                    | PIK3R1,PIK3CA,ITGB1,GRB2,SOS1,SHC1,FASLG,PTEN,PTK2,CDKN1B,AKT1,PDK2,ILK,BCAR1,FOXO3,PIK3CB,PIK3CD,PIK3CG                                                                                                                                                                                                                                                                                                                                                                                                                           |
| Insulin-mediated glucose transport                                | VAMP2,ASIP,AKT2,AKT1,KRIT1,IL1RN,LNPEP,PPP1CC,SLC2A4,TRIP10,TBC1D4,YWHAQ,RHOQ,PAR3,MTG1                                                                                                                                                                                                                                                                                                                                                                                                                                            |
| erythropoietin mediated neuroprotection through nf-kb             | RELA,NFKBIA,HIF1A,CREB1,EP300,COP55,ARNT,JUN,EPO,JAK2,EPOR,SOD2,CDKN1A,PAK3,ROS1,TIMP1,EPX,ARHGFE7,MIA3                                                                                                                                                                                                                                                                                                                                                                                                                            |
| TCR signaling in nave CD4+ T cells                                | RHOA,RAC1,NCK1,LAT,VAV1,GRAP2,CDC42,CD28,SOS1,GRB2,CD3G,CD4,CD3D,CD3E,RAP1A,FYN,LCK,CBL,FLNA,GAB2,ITK,AKT1,PDK1,PAG1,CSK,BCL10,CARD11,TRAF6,MALT1,PTEN,ORAI1,STIM1,RASGRP1,CD247,MAP3K8,CRAT,DAG1,FYB,INPP5D,LCP2,PDPK1,PTPN6,PTPN11,PTPRC,SH3BP2,SHC1,WAS,ZAP70,NR0B2,IKBK,MAP3K14,MAP4K4,RASGRP2,MAP4K1,ORC3,STK39,DBNL,CROT,TRPV6,RASSF5,SPNS1,SLA2,MTG1,TARP                                                                                                                                                                   |
| gata3 participate in activating the th2 cytokine genes expression | PRKAR2B,PRKACB,PRKAR2A,PRKAR1B,PRKAR1A,PRKACG,ADCY1,GNAS,MAP2K6,MAP2K3,IL5,MAPK14,IL13,IL4,GATA3,JUNB,MAF,CAMP,ASAH1,RNASEH2A,ATP8A2,CHAMP1                                                                                                                                                                                                                                                                                                                                                                                        |
| inhibition of matrix metalloproteinases                           | TIMP2,MMP14,TIMP1,TIMP3,TIMP4,RECK,MMRN1                                                                                                                                                                                                                                                                                                                                                                                                                                                                                           |
| alternative complement pathway                                    | C3,C6,C5,C7,C8A,C8B,C9,C8G,CFB,AKR1C1,CFD,CXCL10,CFP,PSMA7,ATP5S,IGLC7                                                                                                                                                                                                                                                                                                                                                                                                                                                             |
| Validated targets of C-MYC transcriptional repression             | DLEU2,DLEU1,MIR23B,MIR34A,MIR146A,MIR22,MIR26A1,MIR26A2,MIR26B,MIRLET7G,MAX,NFYA,NFYB,MYC,NFYC,SMAD4,SP1,HDAC3,GFI1,DNMT3A,PPP2R4,GTF2H2,SFXN3,ALDH9A1,TMEM126A,CSDE1,CREB1,TMEFF2,TBP,ID2,COL1A2,SFRP1,DKK1,FTH1,ERBB2,DNTT,CEBPA,ZFP36L1,NDRG2,NDRG1,BRCA1,CEBPD,BCL2,IRF8,SPI1,HMGCS2,TSC2,GADD45A,PDGFRB,WNT5A,HDAC1,CDKN1B,DDIT3,FOXO3,PSG1,CCL5,SLC11A1,ZBTB17,TJP2,MXD4,DAND5                                                                                                                                               |
| Validated targets of C-MYC transcriptional activation             | MIR17,MIR338,MIR200A,MIR429,MIR9-3,MIR141,MAX,PIM1,MYC,TAF10,TAF12,TAF9,TRRAP,RPL11,SMAD3,SMAD4,DDX18,BCAT1,BAX,RCC1,CDC25A,ENO1,PFKM,GAPDH,E2F3,PEG10,BMI1,MYCT1,SERPINI1,PDCD10,KIR3DL1,TAF4B,EIF4G1,EIF4A1,MTA1,ID2,LIN28B,SNAI1,NPM1,NME2,LDHA,TK1,EIF4E,SHMT1,PRDX3,EIF2A,CAD,PTMA,NME1,CDK4,TERT,CREBBP,DFFB,EIF2S1,KAT2A,HMGGA1,HSPD1,IREB2,NBN,ODC1,PMAIP1,PPAT,PTMAP4,OPN1LW,RMRP,SLC2A1,TFRC,TP53,UBTF,FOSL1,SUPT3H,RUVBL1,LONP1,SUPT7L,KAT5,RUVBL2,SPTLC3,NLRP2,PAG1,PCBP4,GPAM,CDCA7,MINA,SLC25A21,MTDH,PAPPA-AS1,IRG1 |

|                                                                            |                                                                                                                                                                                                                                                                                                                                                    |
|----------------------------------------------------------------------------|----------------------------------------------------------------------------------------------------------------------------------------------------------------------------------------------------------------------------------------------------------------------------------------------------------------------------------------------------|
| FOXA2 and FOXA3 transcription factor networks                              | HNF1A,HNF1B,AKT1,PCK1,BDH1,ALB,ALDOB,TTR,FOXF1,AFP,FOXA3,SP1,LPL,APOA1,PDX1,TAT,FOXA1,PKLR,UCP2,GCK,IGFBP1,CREB1,G6PC,TTF1,FOXA2,ACADM,ACADVL,ALAS1,SLC25A6,CDH15,CEBPA,CPT1A,CPT2,NR3C1,HADH,HMGCS1,HNF4A,KCNJ11,LCP1,PSG1,MAP4K2,SLC2A2,ABCC8,TFRC,NKX2-1,TRIM26,PDHX,DLK1,CHPT1,CPEB1,ATAT1,DAND5                                               |
| induction of apoptosis through dr3 and dr4/5 death receptors               | CASP8,CASP10,TNFSF10,RIPK1,TRAF2,TNFRSF25,FADD,TRADD,TNFSF12,DFFB,DFFA,MAP3K14,CASP6,SPTAN1,ACTA1,GAS2,LMNA,CASP7,PARP1,BID,CASP3,CAD,HLA-DRB4,AGFG1,TNFRSF10A,TANK,RPAIN,IRG1                                                                                                                                                                     |
| Stabilization and expansion of the E-cadherin adherens junction            | RAC1,PAK1,CDC42,MET,HGF,EGF,EGFR,IGF1,GIT1,NCK1,EPHA2,ARF6,RHOA,MYL2,SRA1,ABI1,LPP,PIP5K1C,VASP,KIF3C,DIAPH1,MGAT3,ROCK1,PLEKHA7,ADRA1D,IL6,IL8,NAP1L1,PKN1,SOS1,SOX9,RNMT,NAPSA,CHERP,NCKAP1,EXOC3,CYFIP1,LIMA1,C9orf156,ENAH,CAMSAP3,SCAF1,EXOC4,AZI2,NAA25,MTG1,TAB3,MOGAT3                                                                     |
| a6b1 and a6b4 Integrin signaling                                           | PIK3R1,MET,CD9,HRAS,GRB2,EGFR,EGF,ERBB2,ERBB3,AKT1,ADRA1D,COL17A1,MSMB,MST1,MST1R,PIK3CA,PIK3CB,PIK3CD,PIK3CG,SHC1,RNMT,THOC1,YWHAQ,TMPRSS13,LMLN,MTG1,SIRPA                                                                                                                                                                                       |
| fibrinolysis pathway                                                       | FGA,FGB,FGG,UBE2A,F2R,CPB2,SERPINE1,SERPINE2,PLAT,PLAU,ZFXH3,ATP2A2,AKR1C2,UBA1                                                                                                                                                                                                                                                                    |
| regulation of pgc-1a                                                       | CAMK4,HDAC5,PPARGC1A,PPP3CA,PPP3CC,PPP3CB,PPARA,YWHAH,ESRRA,SLC2A14,KRIT1,CAMK1,CAMKK2,YWHAQ                                                                                                                                                                                                                                                       |
| S1P1 pathway                                                               | CDC42,RHOA,RAC1,PDGFRB,PDGFB,SPHK1,PAK1,ABCC1,ADRA1D,S1PR1,KDR,PKN1,PTGS2,MBTPS1,DYT10,MTG1,PRRT2                                                                                                                                                                                                                                                  |
| extrinsic prothrombin activation pathway                                   | PROS1,PROC,FGA,FGB,FGG,F2R,F3,F5,F10,F7,TFPI,TF,ZFXH3,CNTN1,PCID2,FAM110A                                                                                                                                                                                                                                                                          |
| antigen processing and presentation                                        | HLA-DRB1,HLA-DRA,HLA-A,B2M,CD74,KLK3,TAP2,TAP1,GCNT2,KLKB1,TCN2,VIPR1,SEC14L2,TAF8,SEC14L3                                                                                                                                                                                                                                                         |
| Ephrin A reverse signaling                                                 | EPHA5,FYN                                                                                                                                                                                                                                                                                                                                          |
| γ branching of actin filaments                                             | ABL2,NCKAP1,NCK1,PIR,ARPC3,ACTR3,ACTR2,ARPC2,ARPC1A,ARPC4,ARPC1B,WASL,PSMA7,RAC1,CDC42,SLC25A6,WAS,ANGPTL2,CTNINB1,AICDA                                                                                                                                                                                                                           |
| signal transduction through il1r                                           | RELA,FOS,JUN,MAP3K7,IL1RAP,MYD88,IL1R1,TOLLIP,IL1A,CHUK,IKKBK,IKBKG,NFKBIA,IL1B,MAP4K4,IL1RN,MAPK8,IFNB1,IL6,TNF,IFNA1,TRAF6,MAP3K1,MAP2K3,MAP2K6,MAPK14,TAB1,TAB2,DOCK3,FOSB,JUNB,JUND,PEBP1,PKD1,MED1,PPBP,NR2C2,ARHGEF7,ECSIT                                                                                                                   |
| overview of telomerase rna component gene hterc transcriptional regulation | NFYB,NFYA,NFYC,SP3,SP1,RB1,AZF1,PSG1,DAND5                                                                                                                                                                                                                                                                                                         |
| hiv-1 nef: negative effector of fas and tnf                                | BAG4,DFFB,DFFA,TNF,FADD,TRADD,RIPK1,TRAF2,BIRC3,CASP2,TRAF1,MAP3K5,CRA DD,CASP8,FAS,FASLG,DAXX,APAF1,CASP9,RELA,NFKBIA,CHUK,BCL2,MAPK8,MAP3K14,CYCS,BID,CFLAR,MAP2K7,CASP6,CASP7,CASP3,CAD,ALPI,CD47,FASN,AGFG1,IAPP,ARHGEF7,TANK,MAGT1,RPAIN,IRG1                                                                                                 |
| ras-independent pathway in nk cell-mediated cytotoxicity                   | PIK3R1,PIK3CA,KLRC4,KLRC3,KLRC2,KLRD1,KLRC1,HLA-A,B2M,IL18,MAPK3,PTPN6,MAP2K1,PAK1,RAC1,LAT,SYK,VAV1,PIK3CB,PIK3CD,PIK3CG,PKN1,ORC3,SPNS1                                                                                                                                                                                                          |
| fosb gene expression and drug abuse                                        | JUND,FOSB,PPP1R1B,CDK5,GRIA2                                                                                                                                                                                                                                                                                                                       |
| Regulation of retinoblastoma protein                                       | MYL1,RB1,SKP2,HDAC3,RBBP4,PPARG,CDK2,PPP2CA,HDAC1,DNMT1,GSC,SPI1,ID2,JUN,E2F4,ELF1,SUV39H1,TBP,RUNX2,RBP2,MDM2,MITF,TAF1,SIRT1,CKM,MET,BRD2,MEF2C,RAF1,ATF2,SFTPD,PAX3,CDKN1B,CDKN2A,CEBPA,CREBBP,DSP,EIF4E,GDNF,MYOD1,PRB3,MAPK9,PTGDR,KDM5A,OPN1LW,SMARCA4,SMARCB1,SRPR,TFDP1,UBTF,PCAP,REEP5,RNMT,ATF7,RIMBP2,AATF,PAG1,PCBP4,ELAC2,CPEB1,ELOF1 |
| igf-1 signaling pathway                                                    | PIK3R1,PIK3CA,SOS1,GRB2,PTPN11,FOS,JUN,SFR,ELK1,IRS1,IGF1R,IGF1,SHC1,CSNK2A1,RAF1,MAPK3,MAPK8,RASA1,MAP2K1,HRAS,CSNK2A2,FOSB,JUNB,JUND,PIK3CB,PIK3CD,PIK3CG,SYNGAP1,KCNH4,KCNH8                                                                                                                                                                    |
| hop pathway in cardiac development                                         | SRF,NKX2-5,GATA4,ST13,STIP1,HOPX                                                                                                                                                                                                                                                                                                                   |
| mechanism of gene regulation by peroxisome proliferators via ppara         | PPARA,RXRA                                                                                                                                                                                                                                                                                                                                         |
| Visual signal transduction: Cones                                          | GNB3,GNGT2,GNAT2,CNGB3,CNGA3,PDE6C,PDE6H,GRK1,RPE65,RDH5,RDH12,GRK7,DECR1,OLFM4,WDC1,ATP8A2,SLC25A22,SLC25A18,MTG1,RGS9BP                                                                                                                                                                                                                          |

|                                                                                  |                                                                                                                                                                                                                                                                                                                                                                                                         |
|----------------------------------------------------------------------------------|---------------------------------------------------------------------------------------------------------------------------------------------------------------------------------------------------------------------------------------------------------------------------------------------------------------------------------------------------------------------------------------------------------|
|                                                                                  | OSM,RAC1,TRAF6,TRAF2,TAB2,ATM,KRIT1,GADD45A,IRF6,MAP3K1,MAP3K3,MAP3K4,MAP3K5,MAP3K10,MAP2K3,MAP2K6,MAP3K7,NR2C2,TXN,MAP3K6,TANK,VAC14,CCM2                                                                                                                                                                                                                                                              |
| p38 MAPK signaling pathway                                                       |                                                                                                                                                                                                                                                                                                                                                                                                         |
| cbl mediated ligand-induced downregulation of egf receptors pathway              | SRC,EGFR,EGF,SH3KBP1,GRB2,CBL,ENG,DYT10,PRRT2                                                                                                                                                                                                                                                                                                                                                           |
| estrogen responsive protein efp controls cell cycle and breast tumors growth     | SFN,ESR1,SMURF1,TRIM25,TP53,SLC25A6,REXO2                                                                                                                                                                                                                                                                                                                                                               |
| FOXA transcription factor networks                                               | FOXA3,FOXA2,FOXA1                                                                                                                                                                                                                                                                                                                                                                                       |
|                                                                                  | ADRBK1,DRD2,DRD1,GNGT1,GNB1,GNAS,GRM1,PRKAR2B,PRKACB,PRKAR2A,PRKAR1B,PRKAR1A,PRKACG,CDK5R1,CDK5,PPP1R1B,PPP1CA,PPP2R5D,PLCB1,ADCY1,PPP3CA,CSNK1D,CAMP,KRIT1,DAG1,DIO2,FCN2,GCHFR,IL12A,NCS1,LMOD1,BBS9,IGHD2-15,ATP8A2,UPK3B,MTG1,CHAMP1                                                                                                                                                                |
| regulation of ck1/cdk5 by type 1 glutamate receptors                             | ADRA1D                                                                                                                                                                                                                                                                                                                                                                                                  |
| E-cadherin signaling events                                                      | PIK3R1,PIK3CA,CDK4,CDK6,CCND1,RELA,TFDP1,E2F1,CDK2,CCNE1,RB1,NFKBIA,RAC1,CDKN1A,RAF1,MAPK1,MAPK3,RHOA,CDKN1B,MAP2K2,MAP2K1,PAK1,PDPK1,HRAS,AKT1,PAK3,PIK3CB,PIK3CD,PIK3CG,PRB3,PKN1,ARHGEF7                                                                                                                                                                                                             |
| influence of ras and rho proteins on g1 to s transition                          | TFDP1,E2F1,SKP2,NEDD8,CUL1,UBE2M,CKS1B,RBX1,CDK2,CCNE1,RB1,CDKN1B,SKP1,IFI27,RIT1                                                                                                                                                                                                                                                                                                                       |
| regulation of p27 phosphorylation during cell cycle progression                  | EP300,MITF,KIT,KITLG,BCL2,MAP2K2,MAP2K1,RPS6KA1,MAPK1,MAPK3,HRAS,RAF1,CREB1,MTG1                                                                                                                                                                                                                                                                                                                        |
| melanocyte development and pigmentation pathway                                  | SP100,DAXX,PML,RB1,SUMO1,UBE2I,TP53,PRAM1,SIRT1,CREBBP,PAX3                                                                                                                                                                                                                                                                                                                                             |
| regulation of transcriptional activity by pml                                    | CARD11,BCL10,MALT1,BCR,LYN,JUN,FOS,SOS1,GRB2,CSK,BLNK,SYK,RELA,PAG1,CD72,CD19,PIK3R1,BTK,HRAS,RAF1,IBTK,BCL2A1,TRAF6,VAV2,ETS1,RAC1,PTEN,CD22,AKT1,ELK1,PDK1,CAMK2G,KRIT1,CSNK2A1,DAG1,DOK1,INPP5D,MAP3K1,PDPK1,PIK3CA,PIK3CB,PIK3CD,PIK3CG,POU2F2,MAPK3,MAPK8,MAP2K1,PTPN6,PTPRC,RASA1,SHC1,SLC22A2,MAP3K7,NR2C2,NR0B2,IKBK,SH3BP5,THOC1,MAP4K1,KCNH4,DAPP1,DYT10,PHF11,MTG1,PRRT2,PIK3AP1,KCNH8,SIRPA |
| BCR signaling pathway                                                            | KREMEN2,LRP6,DKK2,DKK1,CREBBP,PITX2,EP300,HDAC1,PROC,CTNNB1,AXIN1,TRRAP,WNT1,FZD1,LEF1,LDB1,CSNK2A1,CCND2,PPP2R5D,GSK3B,WIF1,DVL1,FRAT1,APC,CSNK2A2,EIF4E,MED1,OPN1LW,DVL1P1,LDB2,HDAC9,KAT5,PAG1,PCBP4                                                                                                                                                                                                 |
| multi-step regulation of transcription by pitx2                                  | CDC42,PAK1,PLK1,CDK1,SPC24,RHOA,BORA,APC,CDC20,PPP2CA,PPP2R1A,PPP1CB,ECT2,CDC25B,INCEP,BUB1,CDC25C,TPX2,CDC14B,CENPE,KIF2A,ROCK2,NUDC,WEE1,BUB1B,GOLGA2,MAD2L1,MXI1,PPP1R12A,PKN1,PROC,RAB1A,TPT1,PRRC2A,KIF20A,NDC80,STAG2,NINL,KIAA1549L,FBXO5,FZR1,ERCC6L,SPANXC,GORASP1,MLF1IP,MTG1,ZNF367,CRYGEP                                                                                                   |
| PLK1 signaling events                                                            | GRAP2,LAT,JUN,MAP3K8,LCP2,MAP3K1,MAPK8,MAP2K4,MAP3K7,NR2C2,MAP4K1,ORC3,DBNL,CROT,SPNS1                                                                                                                                                                                                                                                                                                                  |
| JNK signaling in the CD4+ TCR pathway                                            | PIK3R1,PIK3CA,RELA,MAP2K6,MAP3K1,RB1,MAP2K3,CREB1,SP1,MAPK14,MAP2K2,PDPK1,MAP2K1,AKT1,MAPK1,MAPK3,PIK3CB,PIK3CD,PIK3CG,PSG1,DAND5                                                                                                                                                                                                                                                                       |
| human cytomegalovirus and map kinase pathways                                    | HRAS,IRS1,GRB2,NCK2,CBL,PIK3R1,NCK1,GRB10,SOS1,PDK1,GRB14,AKT2,CAMP,AKT1,SGK1,CLK3,CTAA1,DOK1,EIF4EBP1,F2RL2,FOXO3,RAPGEF1,INPP5D,RPSA,LNPEP,LRP1,PDPK1,SERPINB6,PIK3CA,PIK3CB,PIK3CD,PIK3CG,PTPN1,PTPN11,PTPRA,RASA1,SHC1,PTPLA,TRIP10,MVP,THOC1,CAP1,SORBS1,SH2B2,EXOC5,EXOC3,EXOC7,RHOQ,BRD4,PAR6A,EXOC6,EXOC1,EXOC2,PAR3,EXOC4,MTG1,SIRPA,EXOC8,CHAMP1                                              |
| Insulin Pathway                                                                  | PIK3R1,PIK3CA,GNB1,GNAQ,GNGT1,PDE3B,PDE3A,BDKRB2,PRKAR2B,PRKACB,PRKAR2A,PRKAR1B,PRKAR1A,PRKACG,CAV1,NOS3,SLC7A1,PLN,TNNI1,PDE2A,PDPK1,PLCG1,AKT1,RYR2,APRT,KRIT1,DAG1,FGFR3,HSP90AA1,HSP90AA2,PIK3CB,PIK3CD,PIK3CG,PRKG1,VEGFA,MTG1,NANOS3                                                                                                                                                              |
| actions of nitric oxide in the heart                                             | GNA12,GNAQ,GNA13,GNB1,GNGT1,ARHGAP5,MYLK,MYL2,PPP1R14A,PLCB1,PKN1,ROCK1,PPP1R12B,KRIT1,DAG1,FZD4,LPAR3,DYT10,LGR6,PRRT2,MRGPRX3,MRGPRX4,GPR151,OXER1,GPRC6A,MRGPRX1,VN1R17P,GPR166P                                                                                                                                                                                                                     |
| pkc-catalyzed phosphorylation of inhibitory phosphoprotein of myosin phosphatase | JUNB,FOS,JUND,JUN,CRTC1,TRIP6,FOSB,ATF2,GATA2,CREB1,MAF,MAFG,ATF3,TCF4,BAG1,HIF1A,EGR1,MYC,MYB,DMP1,DMTF1,SP1,CDK1,ELF1,CCL2,CYR61,COL1A2,TIMP1,PTEN,ETS1,TH,IL2,IL6,IL8,IL5,IL4,IL10,MT2A,TGFB1,MMP1,CDKN1B,CDKN2A,DISP1,EDN1,FABP4,FOSL2,GDNF,NR3C1,NPPA,PLAU,PSG1,TCF7L2,TP53,FOSL1,HESX1,BCL2L11,RNASEH2A,COP55,ELOF1,PRAP1,RNF187,DAND5                                                            |
| AP-1 transcription factor network                                                |                                                                                                                                                                                                                                                                                                                                                                                                         |

|                                                                                |                                                                                                                                                                                                                                                                                                                                                                          |
|--------------------------------------------------------------------------------|--------------------------------------------------------------------------------------------------------------------------------------------------------------------------------------------------------------------------------------------------------------------------------------------------------------------------------------------------------------------------|
| ion channels and their functional role in vascular endothelium                 | GNAS,GNGT1,GNB1,BDKRB2,CAV1,NOS3,AKT1,ADCY1,CAMP,KRIT1,HSP90AA1,HSP90AA2,PRKG1,SGCB,FZD4,LPAR3,ATP8A2,LGR6,UBXN11,MTG1,MRGPRX3,MRGPRX4,GPR151,OXER1,GPRC6A,MRGPRX1,CHAMP1,NANOS3,VN1R17P,GPR166P                                                                                                                                                                         |
| apoptotic dna-fragmentation and tissue homeostasis                             | HMGB1,HMGB2,DFFA,DFFB,CASP3,CASP7,GZMB,ENDOG,CAD,IRG1                                                                                                                                                                                                                                                                                                                    |
| IL23-mediated signaling events                                                 | STAT5A,TYK2,IL23R,JAK2,IL12B,IL23A,PIK3R1,STAT4,STAT3,STAT1,SOCS3,RELA,IL18,IL18R1,IL19,IL24,IL6,IL17F,IL2,CXCL1,NOS2,CD4,CXCL9,CD3E,CCL2,ALOX12B,IL17A,PIK3CA,PIK3CB,PIK3CD,PIK3CG,THOC1,SIRPA,NANOS2                                                                                                                                                                   |
| regulation of map kinase pathways through dual specificity phosphatases        | DSP,DSPP                                                                                                                                                                                                                                                                                                                                                                 |
| Retinoic acid receptors-mediated signaling                                     | VDR,RARS,NRIP1,CDK7,HDAC3,HDAC1,CDK1,AKT1,CREBBP,CYP27B1,EIF4E,ERCC3,GTF2H1,GTF2H2,GTF2H3,GTF2H4,MNAT1,MAPK3,MAPK8,RBP1,OPN1LW,NCOA3,PEA15,KAT2B,NCOA2,PAG1,PCBP4,ANIB1,GTF2H5                                                                                                                                                                                           |
| Internalization of ErbB1                                                       | RHOA,RAC1,PAK1,GRB2,CBL,EGFR,EGF,SOS1,DNM1,CDC42,RAF1,SRC,SYNJ1,LRIG1,TSG101,EPS15,HGS,USP8,PIK3CA,PIK3CB,PIK3CD,PIK3CG,PKN1,PTK2,RAB5A,THOC1,STAMBIP,SH3KBP1,CHMP3,ZFYVE28,MTG1,SIRPA                                                                                                                                                                                   |
| Glypican 3 network                                                             | PTCH1,GPC3,FURIN,BMP4,FGF7                                                                                                                                                                                                                                                                                                                                               |
| Signaling events mediated by VEGFR1 and VEGFR2                                 | PAK1,NCK1,GRB2,FRS2,SOS1,GAB1,PIK3R1,NRP1,NRP2,HRAS,RHOA,ROCK1,RAC1,IQGAP1,ARNT,HIF1A,SHB,SRC,FYN,GRB10,NEDD4,VHL,VEGFB,FES,PDK1,AKT1,RHO,CD42,ADRA1D,KRIT1,DAG1,DECR1,S1PR1,EPAS1,PTK2B,FLT1,FLT4,HSPB1,HSPB2,KDR,NELL1,NELL2,PDPK1,PIK3CA,PIK3CB,PIK3CD,PIK3CG,PKN1,MAP2K3,PTK2,PTPN6,PTPN11,SHC1,VEGFA,NR0B2,SH2D2A,MAP3K13,THOC1,SHC2,IGKV1D-39,MTG1,PIGU,SIRPA,MIA3 |
| amb2 Integrin signaling                                                        | RAC1,PAK1,CDC42,HMGB1,CYR61,CTGF,APOB,JAM3,JAM2,HCK,RHOA,LRP1,ICAM1,THY1,AKT1,ROCK1,IL6,ADRA1D,AGER,RPSA,MSMB,MST1,MST1R,PLAT,PLAU,PLAUR,PKN1,PTPRA,MOK,RAP1A,SELPLG,MVP,C1D,TERF2IP,TMPRSS13,LMLN,MTG1,PRAP1,LINC00914                                                                                                                                                  |
| how does salmonella hijack a cell                                              | ACTR2,ARPC4,ARPC3,ARPC2,ARPC1A,ACTR3,ARPC1B,WASF1,WASL,CDC42,RAC1,SLC25A6,ANGPTL2,AICDA,MTG1                                                                                                                                                                                                                                                                             |
| basic mechanism of action of pparb(d) and pparg and effects on gene expression | PPARA,RXRA,PPARD,PPARG                                                                                                                                                                                                                                                                                                                                                   |
| Arf6 signaling events                                                          | IPCEF1,MET,HGF,GNAQ,EGF,EGFR,KIF13B,ARF6,LHCGR,GIT1,ACAP1,EPHA2,NCK1,AAP2,FBXO8,KIF3B,TRE17,SRC,TSHR,ACAP2,AGTR1,ADRA1D,IL6,PSD,SOS1,RNMT,USP6,CYTH3,CYTH2,IQSEC1,ADAP1,GULP1,MTG1                                                                                                                                                                                       |
| a4b1 and a4b7 Integrin signaling                                               | ADRA1D                                                                                                                                                                                                                                                                                                                                                                   |
| endocytotic role of ndk phosphins and dynamin                                  | BIN1,BIN2,EPN1,AP2A1,PICALM,EPS15,AP2M1,DNM1,PPP3CA,PPP3CC,PPP3CB,NME1,NME2,AMPH,SLC25A6,KRIT1,GTF3A,RMRP,SNAP91,WDTC1,ATP8A2                                                                                                                                                                                                                                            |
| pelp1 modulation of estrogen receptor activity                                 | PELP1,ESR1,CREBBP,EP300,SRC,EIF4E,OPN1LW,PAG1,PCBP4                                                                                                                                                                                                                                                                                                                      |
| Signaling events mediated by HDAC Class III                                    | HOXA10,SIRT2,SIRT1,SIRT7,HDAC4,MEF2D,BAX,FHL2,FOXO1,FOXO4,SIRT3,CREBBP,EIF4E,FOXO3,XRCC6,MYOD1,OPN1LW,TP53,KAT2B,PPARGC1A,PAG1,PCBP4,ACSS1                                                                                                                                                                                                                               |
| vegf hypoxia and angiogenesis                                                  | PIK3R1,PIK3CA,CSK,BCAR1,PXN,PTK2,SRC,ACTA1,BDKRB2,GRB2,SOS1,SHC1,CAV1,NOS3,HIF1A,ARNT,PLCG1,HRAS,PDPK1,AKT1,VHL,KRIT1,DAG1,HSP90AA1,HSP90AA2,PIK3CB,PIK3CD,PIK3CG,VEGFA,PXDN,DYT10,MTG1,PRRT2,NANOS3,MIA3                                                                                                                                                                |
| transcription factor creb and its extracellular signals                        | PIK3R1,PIK3CA,GNAS,CREB1,PRKAR2B,PRKACB,PRKAR2A,PRKAR1B,PRKAR1A,PRKACG,GRB2,SOS1,SHC1,AKT1,RPS6KA1,HRAS,PDPK1,MAPK14,CAMP,ASAH1,KRIT1,DAG1,NT5E,NTS,PIK3CB,PIK3CD,PIK3CG,MAPK1,MAPK3,FZD4,RPS6KA5,LPAR3,DYT10,ATP8A2,LGR6,MTG1,PRRT2,MRGPRX3,MRGPRX4,GPR151,OXER1,GPRC6A,MRGPRX1,CHAMP1,VN1R17P,GPR166P                                                                  |
| telomeres telomerase cellular aging and immortality                            | TEP1,TERT,XRCC6,TERF1,XRCC5,RB1,TP53,AKT1,PPP2R5D,BCL2,MYC,TNKS,KRAS,POLR2A,PRKCA,PTEN                                                                                                                                                                                                                                                                                   |
| multi-drug resistance factors                                                  | ABCC1,ABCB11,ABCB4,GSTP1,ABCC3,ABCB1                                                                                                                                                                                                                                                                                                                                     |



|                                                   |                                                                                                                                                                                                                                                                                                                                                                                                         |
|---------------------------------------------------|---------------------------------------------------------------------------------------------------------------------------------------------------------------------------------------------------------------------------------------------------------------------------------------------------------------------------------------------------------------------------------------------------------|
|                                                   | RHOA,CDC42,IQGAP1,SEPT2,ARPC3,ARPC4,ARPC5,ARPC1B,ARPC2,RAC1,PIK3R1,HRAS,PAK1,EP8,MYL2,APC,DLG1,CBL,TIAM1,ATF2,PAX6,HES5,PAK4,RASGRF1,LIMK1,VAV2,MTOR,PLD1,LIMK2,JUN,MAP3K11,IQGAP3,ADRA1D,ARHGDI2A,F2RL2,GDNF,MAP3K1,PIK3CA,PIK3CB,PIK3CD,PIK3CG,PKN1,PRKCSH,MAPK8,MAPK9,MAP2K7,PROC,MAP2K4,CDC42BPA,WASL,THOC1,ACTR3,ACTR2,TNK2,BAIAP2,SEPT6,EXOC7,ANGPTL2,PARD6A,ENAH,PARD3,AICDA,MTG1,SIRPA,APOBEC3A |
| CDC42 signaling events                            |                                                                                                                                                                                                                                                                                                                                                                                                         |
| ca-calmodulin-dependent protein kinase activation | CAMK4,CREB1,KRIT1,CAMK1,CAMKK2                                                                                                                                                                                                                                                                                                                                                                          |
|                                                   | STAT5A,JAK3,JAK1,IL4R,IL4,IRS2,FES,JAK2,IL13RA1,PIK3R1,STAT6,PARP14,IRF4,BCL6,IRS1,GRB2,ETS1,OPRM1,IL13RA2,ARG1,ALOX15,SP1,SOCS5,COL1A1,TFF3,PIGR,COL1A2,CCL11,CCL26,EGR2,IL10,THY1,IGHG3,GTF3A,IGHG4,FCER2,IL5,SPI1,SOCS3,CCL17,CD40LG,CBL,SOCS1,MTOR,AKT1,CEBPB,HMGA1,INPP5D,LTA,PIK3CA,PIK3CB,PIK3CD,PIK3CG,PSG1,PTPN6,SELP,SHC1,STAT5B,NR0B2,THOC1,AICDA,TINAGL1,RETNLB,SIRPA,DAND5                 |
| IL4-mediated signaling events                     |                                                                                                                                                                                                                                                                                                                                                                                                         |
| eukaryotic protein translation                    | EIF2S1,EIF2S2,EIF2S3,EIF4G2,EIF4G1,EIF4A1,EIF4E,EIF4A2,EIF4G3,EIF5B,EIF1,EIF1AX,EIF5,EIF6,EIF3A                                                                                                                                                                                                                                                                                                         |
|                                                   | PIK3R1,PIK3CA,RELA,HLA-DRB1,HLA-DRA,LCK,CD3D,CD3G,CD3E,CD4,ZAP70,PPP3CA,PPP3CC,PPP3CB,NFKBIA,FOS,JUN,GRB2,SOS1,SHC1,MAP2K1,MAPK8,RAC1,MAP2K4,ELK1,PTPN7,RAF1,MAP3K1,MAPK3,PLCG1,PTPRC,HRAS,FYN,VAV1,LAT,KRIT1,CD247,DAG1,FOSB,JUNB,JUND,PIK3CB,PIK3CD,PIK3CG,RASA1,TRA,TRB,ARHGEF7,RGS6,KCNH4,ORC3,DYT10,SPNS1,MTG1,PRRT2,KCNH8,TARP                                                                    |
| t cell receptor signaling pathway                 |                                                                                                                                                                                                                                                                                                                                                                                                         |
|                                                   | STAT5A,CD40,JAK3,TRAF2,C4BPA,TRAF3,RELA,TRAF1,TRAF6,JUN,MYC,AKT1,IL4,BIRC3,CD40LG,MAP3K1,PIK3CA,PIK3CB,PIK3CD,PIK3CG,MAP2K4,TNFAIP3,MAP3K14,MAP4K4,THOC1,TANK,IGKV1-27,TDP2,SIRPA                                                                                                                                                                                                                       |
| CD40/CD40L signaling                              |                                                                                                                                                                                                                                                                                                                                                                                                         |
|                                                   | PIK3R1,JUNB,FOS,RHOA,FOSB,JUND,CDC42,JUN,RAC1,PAK1,ELK1,IRS1,ATF6B,FOSL2,PIK3CA,PIK3CB,PIK3CD,PIK3CG,PKN1,MAPK8,FOSL1,MBTPS1,S1PR2,RNASEH2A,GNA13,KCNH4,MTG1,KCNH8                                                                                                                                                                                                                                      |
| S1P2 pathway                                      |                                                                                                                                                                                                                                                                                                                                                                                                         |
|                                                   | SMAD4,SKI,SMAD5,BMP6,SMAD1,SMURF2,BMP2,BMP7,CHRD,SMURF1,SMAD6,NOD1,CER1,GREM1,XIAP,PPP1CA,SMAD7,BAMBI,CHRD1,NUP214,PPM1A,AHSG,GARS,SMAD9,MAPK1,MAP3K7,NR2C2,ZFYVE16,FST,PPP1R15A,C3CER1,SOSTDC1,GBGT1,RGMA                                                                                                                                                                                              |
| BMP receptor signaling                            |                                                                                                                                                                                                                                                                                                                                                                                                         |
|                                                   | STAT5A,CD4,CD3G,CD3D,CD3E,TYK2,IL12A,IL12B,JAK2,STAT1,IL2,SOCS1,RELB,SPHK2,STAT3,CD8B,CD8A,IL18,IL18R1,STAT4,RELA,EOMES,IL4,FOS,CCR5,LCK,STAT6,NOS2,ATF2,MTOR,FASLG,GADD45B,GADD45G,CD247,GDNF,HLX,IL1R1,IL1RN,IL2RA,CCL3,CCL4,RAB7A,RIPK2,ARHGEF28,RAB7B,NANOS2,TARP                                                                                                                                   |
| IL12-mediated signaling events                    |                                                                                                                                                                                                                                                                                                                                                                                                         |
| deregulation of cdk5 in alzheimers disease        | CDK5,CDK5R1,PPP2R5D,MAPT,CAPN1,GSK3B,FCN2,GCHFR,IL12A,UPK3B                                                                                                                                                                                                                                                                                                                                             |
|                                                   | CDC42,RAC1,PAK1,RHOA,MYL2,GNB1,GNG2,PIK3R1,SNX1,SNX2,TRPC6,GRK5,AKAP13,VASP,ADRBK2,ARHGDI2A,ATF6B,DAG1,F2R,F2RL2,PIK3CA,PIK3CB,PIK3CD,PIK3CG,PKN1,NR1I2,THOC1,GNA13,PARD3,SLC52A2,MTG1,SIRPA,PWAR1                                                                                                                                                                                                      |
| PAR1-mediated thrombin signaling events           |                                                                                                                                                                                                                                                                                                                                                                                                         |
|                                                   | CDC42,RHOA,TIAM1,EPHA2,GRB2,PIK3R1,RAC1,SRC,CBL,PAK1,INPPL1,PIK3CA,PIK3CB,PIK3CD,PIK3CG,PKN1,PTK2,MBTPS1,THOC1,MTG1,SIRPA                                                                                                                                                                                                                                                                               |
| EPHA2 forward signaling                           |                                                                                                                                                                                                                                                                                                                                                                                                         |
|                                                   | PIK3R1,PIK3CA,NTRK1,GRB2,SOS1,SHC1,CREB1,RAF1,MAP2K2,MAP2K1,PDPK1,HRAS,AKT1,PLCG1,MAPK1,MAPK3,RPS6KA1,MAPK7,MAP2K5,PIK3CB,PIK3CD,PIK3CG,MTG1                                                                                                                                                                                                                                                            |
| role of erk5 in neuronal survival pathway         |                                                                                                                                                                                                                                                                                                                                                                                                         |
|                                                   | GNAS,GNB1,GNGT1,PRKAR2B,PRKACB,PRKAR2A,PRKAR1B,PRKAR1A,PRKACG,ADCY1,CAMP,ATP8A2,MTG1,CHAMP1                                                                                                                                                                                                                                                                                                             |
| activation of camp-dependent protein kinase pka   |                                                                                                                                                                                                                                                                                                                                                                                                         |
|                                                   | RELA,MADD,TRADD,RIPK1,TNF,TRAF2,BIRC3,CRADD,BAG4,NFKBIA,FADD,CASP8,RAF1,MAPK8,MAPK1,MAPK3,NSMAF,SMPD1,MAP4K4,CYCS,MAP2K4,MAP3K1,BCL2,MAP2K2,MAP2K1,BAX,BAD,ETFA,ETFB,ETFDH,AGFG1,KSR1,ARHGEF7,AIFM1,TANK,CNKSRI,RPAIN                                                                                                                                                                                   |
| ceramide signaling pathway                        |                                                                                                                                                                                                                                                                                                                                                                                                         |
|                                                   | FGFR4,FGF1,FGF9,FGF16,FGF6,FGF8,FGF19,FGF17,FGF18,FGF2,FGF4,FGF23,FGF3,FGF10,FGF5,CASK,SRC,HRAS,IL8,TGFB1,EPHB2,RHOA,BAX,MMP2,ADRA1D,FGF13,MAPK8,RASA1,GNB2L1,TNFRSF13B,DYT10,TRAPPC4,PRRT2                                                                                                                                                                                                             |
| Syndecan-2-mediated signaling events              |                                                                                                                                                                                                                                                                                                                                                                                                         |
|                                                   | RHOA,CDC42,GIT1,CRKL,CBL,CRK,DOCK1,PIK3R1,RAC1,ARF6,VCAM1,PAK1,ADRA1D,PIK3CA,PIK3CB,PIK3CD,PIK3CG,PKN1,THOC1,MTG1,SIRPA                                                                                                                                                                                                                                                                                 |
| Paxillin-dependent events mediated by a4b1        |                                                                                                                                                                                                                                                                                                                                                                                                         |
| Glypican pathway                                  | GPC3,GPC2,GPC1                                                                                                                                                                                                                                                                                                                                                                                          |

|                                                                                                                                       |                                                                                                                                                                                                                                                                                                                                                                                                                                        |
|---------------------------------------------------------------------------------------------------------------------------------------|----------------------------------------------------------------------------------------------------------------------------------------------------------------------------------------------------------------------------------------------------------------------------------------------------------------------------------------------------------------------------------------------------------------------------------------|
| LPA receptor mediated events                                                                                                          | JUNB,FOS,FOSB,JUND,CDC42,JUN,LPA,PIK3R1,GNB1,GNG2,RAC1,EGFR,TRIP6,CRK,RELA,HRAS,RHOA,GAB1,SRC,AKT1,LYN,TIAM1,IL8,IL6,PAK1,CAMP,ATF6B,DAG1,LPAR1,PTK2B,FOSL2,LPAR4,MAPT,PIK3CA,PIK3CB,PIK3CD,PIK3CG,PKN1,PRKD1,PTK2,FOSL1,LPAR2,SLC9A3R2,THOC1,RNASEH2A,GNA13,LPAR3,MTG1,PIGU,SIRPA,MAGI3,CHAMP1                                                                                                                                        |
| VEGFR3 signaling in lymphatic endothelium                                                                                             | COL1A2, COL1A1, PIK3R1, SOS1, GRB2, CRK, AKT1, CREB1, ADRA1D, FIGF, FLT4, PIK3CA, PIK3CB, PIK3CD, PIK3CG, MAP2K4, SHC1, THOC1, DYT10, PRRT2, SIRPA                                                                                                                                                                                                                                                                                     |
| RhoA signaling pathway                                                                                                                | PAK1, CDC42, RHOA, MAL, JUN, ATF2, SRF, MYL2, PTEN, FOS, CYR61, PKN2, CD8A, CDKN1B, DIAPH2, F2RL2, GDNF, LIF, PPP1R12A, PKN1, MAPK8, MAP2K4, SLC9A1, SLC9A3, PARD6A, PARD3, MKL1, MTG1                                                                                                                                                                                                                                                 |
| sumoylation as a mechanism to modulate ctbp-dependent gene responses                                                                  | CTBP1, NOS1, SUMO1, UBE2A, CDH1, UBE3A, ZEB1, UBA1, FZR1, ATP8A2, NANOS1                                                                                                                                                                                                                                                                                                                                                               |
| IFN-gamma pathway                                                                                                                     | STAT1, JAK2, JAK1, IFNGR1, SOCS1, PIK3R1, CRKL, CBL, PIAS1, CEBPB, PTGES2, STAT3, MAP3K11, SMAD7, IRF1, DAPK1, IRF9, MTOR, AKT1, KRIT1, CREBBP, EIF4E, RAPGEF1, MAP3K1, PIK3CA, PIK3CB, PIK3CD, PIK3CG, MAP2K1, PTPN2, PTPN11, RAP1A, OPN1LW, THOC1, PIAS4, TERF2IP, PAG1, PCBP4, MTG1, SIRPA                                                                                                                                          |
| regulation of eif-4e and p70s6 kinase                                                                                                 | PIK3R1, PIK3CA, PABPC1, EIF4G1, EIF4A1, EIF4E, PSMC4, EIF4EBP1, GH1, IRS1, GHR, MAPK14, PTEN, PDPK1, MAPK3, MAPK1, PDK2, AKT1, PPP2CA, MKNK1, RPS6KB1, MTOR, PIK3CB, PIK3CD, PIK3CG, RPS6, GGH, DYT10, PRRT2                                                                                                                                                                                                                           |
| S1P3 pathway                                                                                                                          | CDC42, RHOA, PDGFRB, RAC1, AKT1, PAK1, AKT3, SRC, CXCR4, JAK2, ADRA1D, ATF6B, S1PR1, S1PR3, FLT1, PKN1, MBTPS1, S1PR2, GNA13, MTG1                                                                                                                                                                                                                                                                                                     |
| hiv-1 defeats host-mediated resistance by cem15 inhibition of huntingtons disease neurodegeneration by histone deacetylase inhibitors | HCK, CXCR4, CD4, APOBEC3G, ERVV-1                                                                                                                                                                                                                                                                                                                                                                                                      |
| PDGFR-alpha signaling pathway                                                                                                         | CREBBP, CREB1, HDAC1, EIF4E, HTT, OPN1LW, PRDX2, PAG1, PCBP4                                                                                                                                                                                                                                                                                                                                                                           |
| multiple antiapoptotic pathways from igf-1r signaling lead to bad phosphorylation                                                     | JUND, JUNB, JUN, FOS, FOSB, PDGFRA, CRK, PIK3R1, GRB2, SOS1, SHB, CRKL, ELK1, SRF, SHF, JAK1, CSNK2A1, DAG1, FOSL2, RAPGEF1, PIK3CA, PIK3CB, PIK3CD, PIK3CG, SHC1, FOSL1, THOC1, RNASEH2A, KCNH4, DYT10, PRRT2, KCNH8, SIRPA                                                                                                                                                                                                           |
| Reelin signaling pathway                                                                                                              | PIK3R1, PIK3CA, GRB2, SOS1, SHC1, IGF1R, IGF1, YWHAH, IRS1, MAPK3, HRAS, BAD, RAF1, PIK3CB, PIK3CD, PIK3CG, YWHAQ                                                                                                                                                                                                                                                                                                                      |
| Visual signal transduction: Rods basic mechanisms of sumoylation                                                                      | DAB1, RELN, FYN, LRP8, VLDLR, PIK3R1, GRIN2B, GRIN2A, ARHGEF2, MAPK8IP1, MAP3K11, LRPAP1, CRKL, CDK5, CDK5R1, NCK2, RAP1A, MAP1B, CBL, AKT1, ADRA1D, RAPGEF1, MAPT, NPY6R, PAFAH1B1, PIK3CA, PIK3CB, PIK3CD, PIK3CG, MAPK8, MAP2K7, THOC1, OM A1, SIRPA, DNAAF3                                                                                                                                                                        |
| role of mitochondria in apoptotic signaling                                                                                           | GNGT1, GNAT1, GNB1, RHO, CNGB1, CNGA1, PDE6B, PDE6A, PDE6G, GRK1, RDH12, RPE65, RDH5, SLC24A1, OLFM4, WDTC1, ATP8A2, SLC25A22, SLC25A18, MTG1, RGS9BP                                                                                                                                                                                                                                                                                  |
| spliceosomal assembly                                                                                                                 | SUMO1, SUMO2, SUMO3, SAE1, UBA2, UBE2I, SLC25A6, APRT, RBBP8, ATP8A2                                                                                                                                                                                                                                                                                                                                                                   |
| IL6-mediated signaling events                                                                                                         | CASP9, APAF1, BAX, BCL2, BCL2L1, BAK1, BIK, BID, DIABLO, CYCS, ALPI, CD47, IAPP, VDAC1, AIFM1, MAGT1                                                                                                                                                                                                                                                                                                                                   |
| Arf6 downstream pathway                                                                                                               | SNRPA, SNRPC, SNRPA1, SNRPB2, U2AF2, U2AF1, HNRNPC, SRSF2, SNRNP70                                                                                                                                                                                                                                                                                                                                                                     |
| Regulation of Androgen receptor activity                                                                                              | JUNB, FOS, FOSB, JUND, RHOA, CDC42, JUN, GRB2, SOS1, HCK, JAK1, LMO4, IL6, PIK3R1, RAC1, TYK2, SOCS3, FOXO1, STAT3, JAK2, PIAS3, MITF, STAT1, PIAS1, HSP90B1, CEBPD, TIMP1, LBP, CRP, FGG, MCL1, PAK1, VAV1, CEBPB, A2M, MYC, IRF1, AKT1, CSRP1, EHHADH, FOSL2, IL6R, IL6ST, RPSA, NM, PIK3CA, PIK3CB, PIK3CD, PIK3CG, PKN1, MAP2K6, PTPN11, MAP2K4, CSRP3, FOSL1, TNFSF11, THOC1, LRPPRC, RNASEH2A, MTG1, SIRPA, PPIAP10              |
| inactivation of gsk3 by akt causes accumulation of b-catenin in alveolar macrophages                                                  | CDC42, ARF1, RHOA, RAC1, ARF6, TIAM1, NME1, RAB11A, RAB11FIP3, PIP5K1A, KALRN, PAK1, PKN1, RMRP, MTG1, ARF1P1                                                                                                                                                                                                                                                                                                                          |
|                                                                                                                                       | AR, SRC, CARM1, HOXB13, PDE9A, TMPPRS2, EGR1, HDAC7, MDM2, KLK2, HDAC1, GATA2, CEBPA, SENP1, FOXO1, SRY, SIRT1, JUN, NROB1, AKR1B1, KLK3, AREG, CREBBP, EIF4E, NR3C1, DNAJA1, PLAG1, PKN1, MAPK8, MAP2K6, PROS1, OPN1LW, MAP2K4, SMARCA2, SMARCC1, SMARCE1, NR2C1, NR2C2, TNFSF14, TNFRSF14, TRIM24, KAT2B, NPEPPS, HDAC9, GNB2L1, NCOA2, APPBP2, KAT5, EHMT2, KAT7, SPDEF, RCHY1, PSAT1, PAG1, PCBP4, TAS1R2, DEPDC7, TXNRD3, SLC36A1 |
|                                                                                                                                       | PIK3R1, PIK3CA, RELA, KREMEN2, LRP6, DKK2, NFKBIA, DKK1, PROC, CTNBN1, AXIN1, WNT1, FZD1, MYD88, TIRAP, TLR4, CD14, TOLLIP, LY96, IRAK1, EHHADH, EIF2AK2, BTRC, LEF1, FRAT1, GSK3B, CSNK2A1, DVL1, GJA1, CCND1, WIF1, PDPK1, AKT1, PPP2R5D, LBP, APC, CSNK2A2, IRF6, RPSA, NDUFA2, PIK3CB, PIK3CD, PIK3CG, PKLR, DVL1P1, ARHGEF7                                                                                                       |

|                                                                                                                                                             |                                                                                                                                                                                                                                                                            |
|-------------------------------------------------------------------------------------------------------------------------------------------------------------|----------------------------------------------------------------------------------------------------------------------------------------------------------------------------------------------------------------------------------------------------------------------------|
| classical complement pathway                                                                                                                                | C6,C1QA,C1QB,C1S,C1R,C7,C8A,C8B,C9,C8G,C3,C2,C5,C4B,C1QC,C4A,AKR1C1,HNRNPC,CXCL10,PSMA7,IGLC7                                                                                                                                                                              |
| phospholipase c-epsilon pathway                                                                                                                             | PTGER1,GNAS,ADRB2,PRKAR2B,PRKACB,PRKAR2A,PRKAR1B,PRKAR1A,PRKACG,RAPGEF3,PLCE1,RAP2B,CAMP,ASAH1,DAG1,ATP8A2,CHAMP1                                                                                                                                                          |
| lck and fyn tyrosine kinases in initiation of tcr activation                                                                                                | HLA-DRB1,HLA-DRA,LCK,CD3D,CD3G,CD3E,CD4,ZAP70,FYN,PTPRC,CD247,TRA,TRB,TARP                                                                                                                                                                                                 |
| il22 soluble receptor signaling pathway                                                                                                                     | IL22,IL22RA2,JAK1,IL22RA1,TYK2,IL10RA,SOCS3,IL17D                                                                                                                                                                                                                          |
| the information processing pathway at the ifn beta enhancer                                                                                                 | RELA,HMGB1,ATF2,JUN,CREBBP,ACTB,SMARCB1,SMARCE1,SMARCC2,SMARCC1,SMARCD1,ARID1A,SMARCA4,GTF2F1,GTF2A1,GTF2B,NR3C1,POLR2A,GTF3A,GTF2E1,IFNB1,TBP,EIF4E,GDNF,OPN1LW,KAT2B,ARHGFE7,PAG1,PCBP4,TRIM63,POTEF                                                                     |
| il 4 signaling pathway                                                                                                                                      | HLA-DRB1,HLA-DRA,IL2RG,JAK1,IL4R,JAK3,IL4,STAT6,GRB2,RPS6KB1,SHC1,IGHE,FCER2,AKT1,HMGA1,IRS1,SLC25A6                                                                                                                                                                       |
| rb tumor suppressor/checkpoint signaling in response to dna damage                                                                                          | RB1,E2F1,YWHAH,RASGRF1,MYT1,CDK2,CDKN1A,TP53,CHEK1,WEE1,CDK4,ATM,CDK1,CDC25C,PAK3,POLD1,PKMYT1,YWHAQ                                                                                                                                                                       |
| Signaling events mediated by PTP1B                                                                                                                          | JAK2,PIK3R1,AKT1,CRK,CSF1R,CSF1,GRB2,IRS1,PDGFRB,EGFR,EGF,STAT3,FER,LAT,SRC,RHOA,CSK,TYK2,SOCS3,STAT5A,STAT5B,NOX4,ADRA1D,CRAT,DECR1,DOK1,YBX1,PIK3CA,PIK3CB,PIK3CD,PIK3CG,PTPN1,SHC1,THOC1,ORC3,TRPV6,SPNS1,SIRPA                                                         |
| N-cadherin signaling events                                                                                                                                 | CDC42,RHOA,AXIN1,LRP5,MYL2,GAP43,FER,RAC1,PIK3R1,KIF5B,PIP5K1C,ROCK1,PAK1,FGFR1,CAMK2G,KRIT1,DAG1,GRIA2,GRM2,PIK3CA,PIK3CB,PIK3CD,PIK3CG,PKN1,MAPK8,PTPN1,PTPN11,COX7A2L,THOC1,MAPRE2,MAPRE1,ANKS1B,MTG1,SIRPA                                                             |
| bioactive peptide induced signaling pathway                                                                                                                 | PIK3R1,PIK3CA,AGTR2,GNA11,AGT,GNB1,GNGT1,GNAI1,MYLK,GRB2,SOS1,SHC1,MAPK1,MAPK3,JAK2,FYN,CDK5,MAPK14,HRAS,PTK2B,MAPT,PRKCA,MAPK8,PLCG1,AGXT,KRIT1,DAG1,PIK3CB,PIK3CD,PIK3CG,PRKCB,MYLK2,MYLK3,MTG1                                                                          |
| PAR4-mediated thrombin signaling events                                                                                                                     | RAC1,PAK1,CDC42,RHOA,MYL2,GNB1,GNG2,ATF6B,DAG1,F2RL2,PAWR,PKN1,F2RL3,GNA13,PARD3,MTG1,PWAR4                                                                                                                                                                                |
| proteolysis and signaling pathway of notch generation of amyloid b-peptide by ps1                                                                           | DLL1,PSEN1,NOTCH1,FURIN,ADAM17,CSHL1,RBPJ,PSMB6,YY1<br>PSEN1,APP,BACE1,ADAM10                                                                                                                                                                                              |
| Signaling events mediated by HDAC Class II                                                                                                                  | NUP214,NUP62,NUP210,NUP153,HDAC6,HDAC4,SUMO1,RANBP2,HDAC3,HDAC7,RANGAP1,BCOR,BCL6,HDAC5,HDAC11,GATA1,GNG2,GNB1,GATA2,ANKRA2,RFXANK,RAN,SRF,YWHAB,MFE2C,HDAC9,HDAC10,ADRBK1,NR3C1,NPC1,UBE2I,CCDC6,HIST2H2AA3,HIST2H2AC,HIST2H2BE,HIST1H4F,HIST2H4A,HRH4,MTG1,RLN3,HIST2H3C |
| FAS (CD95) signaling pathway                                                                                                                                | BTK,FASLG,FAS,FADD,CFLAR,SYK,SRC,RFC1,CASP8,CASP10,BID,AKT1,PDK1,FASN,AGFG1,MAP3K1,PDPK1,PIK3CA,PIK3CB,PIK3CD,PIK3CG,MAP2K6,MAP2K7,SLC19A1,SMPD1,IKBKG,RIPK1,THOC1,FAIM2,RPAIN,SIRPA,H19                                                                                   |
| nuclear receptors coordinate the activities of chromatin remodeling complexes and coactivators to facilitate initiation of transcription in carcinoma cells | NCOA2,NCOA3,NCOA1,RXRA,RARA,GTF2F1,GTF2A1,GTF2B,NR3C1,POLR2A,GTF3A,GTF2E1,NCOR2,HDAC3,TBP,GRIP1,OCA2,SRC,TAF9,B3GALNT1,KAT2B,RAB40B,LGALS12                                                                                                                                |
| prion pathway                                                                                                                                               | RPSA,DNAJB6,GFAP,PRNP,BCL2,HSPA5,DNAJB1P1                                                                                                                                                                                                                                  |
| Endogenous TLR signaling                                                                                                                                    | CDC42,RAC1,PAK1,TIRAP,MYD88,RHOA,TLR4,BGN,TLR2,TLR1,S100A9,S100A8,HMGB1,TLR3,SFTPA1,SAA1,VCAN,IRAK2,IRAK4,TLR6,CD14,HSPD1,IRAK1,NDUFA2,PKN1,ABCC8,IKBKG,LY96,ABCC11,MTG1,TICAM1                                                                                            |
| Regulation of nuclear SMAD2/3 signaling                                                                                                                     | JUNB,FOS,FOSB,JUND,JUN,NCOR1,HDAC1,SAP18,SAP30,SMAD2,RBBP4,SIN3A,SIN3B,SMAD4,RBBP7,HDAC2,PIAS3,SMAD3,AR,SP1,MYC,DLX1,ATF2,ATF3,CEBPB,FOXH1,GATA3,RUNX2,SNIP1,TCF3,TFE3,NKX2-5,SKI,TGIF2,MFE2C,VDR,IRF7,MAX,FOXG1,CREB1,COL1A2,IL5,IL10,SMAD7,AKT1,GS                       |
| ALK1 pathway                                                                                                                                                | C,AKR1B1,AREG,CREBBP,CYP27B1,EIF4E,FOSL2,KAT2A,GDNF,NR3C1,HNF4A,HSPA8,IFNB1,CITED1,MYOD1,SERPINE1,SERPINE2,PSG1,PTGDR,OPN1LW,TFDP1,TGIF1,ZBTB17,REEP5,FOSL1,KAT2B,NCOA2,RNASEH2A,MED15,PIAS4,DCP1A,PAG1,PCBP4,TCF7L1,DAND5                                                 |
| map kinase inactivation of smrt corepressor                                                                                                                 | ACVR1,ACVRL1,FKBP1A,FKBP1AP1,FKBP1AP2,FKBP1AP3,FKBP1AP4,SLPI<br>GRB2,SOS1,SHC1,RARA,RXRA,EGF,EGFR,MAPK14,RAC1,MAP2K4,MAP2K1,ZBTB16,NCOR2,HRAS,MAP3K1,RAB40B,MTG1                                                                                                           |

|                                                                           |                                                                                                                                                                                                                                                                                                                                                                                                                                                                                                |
|---------------------------------------------------------------------------|------------------------------------------------------------------------------------------------------------------------------------------------------------------------------------------------------------------------------------------------------------------------------------------------------------------------------------------------------------------------------------------------------------------------------------------------------------------------------------------------|
|                                                                           | AR,CDK6,CARM1,SNURF,MAK,SCP2,MED1,AKT1,CLK2,VAV3,TMPRSS2,PIAS1,SRF,UBA3,HIP1,TCF4,LATS2,NRIP1,FHL2,PELP1,HNRNPA1,PIAS3,BRCA1,AKR1B1,CLK3,AREG,CDKN2A,PTK2B,FKBP4,XRCC6,IL10,NKX3-1,PA2G4,PRDX1,PAWR,PLAG1,PRRX1,PROS1,RNF4,RPS6KA3,SYCP1,TCF7L2,TGFB11,TGIF1,UBE2I,XRCC5,NCOA4,MBD4,F2RL3,NPEPPS,RANBP9,CTDSP2,SYCP2,NCOA2,KDM1A,NCOA6,KDM4C,PATZ1,ZNF318,APPL1,PSAT1,PIAS4,KDM3A,ALPK3,CTDSP1,PYDC1,PWAR4                                                                                     |
| Coregulation of Androgen receptor activity                                | CYCS,HSPB1,APAF1,CASP9,ACTA1,FASLG,FAS,DAXX,MAPKAPK2,BCL2,TNF,IL1A,MAPKAPK3,CASP3,FASN,HSPB2,ROS1                                                                                                                                                                                                                                                                                                                                                                                              |
| stress induction of hsp regulation                                        | PIK3R1,PIK3CA,ITGB1,ITGA1,ZBTB7A,CCT4,PDPK1,AKT1,CASP3,BIRC5,CASP7,DPF2,MTOR,PIK3CB,PIK3CD,PIK3CG,MMRN1                                                                                                                                                                                                                                                                                                                                                                                        |
| b cell survival pathway                                                   | PRKAR2B,PRKACB,PRKAR2A,PKN1,PPP2R5D,AKAP9,PRKAG1,PPP1CA,PRKCE,PRKACG,RHOA,CDK1,POLD1,PPP2R4                                                                                                                                                                                                                                                                                                                                                                                                    |
| protein kinase a at the centrosome                                        | COP,ARHGAP10,CD4,CLTA,COPA,ARF1,CLTB,GGA3,GBF1,PIP5K1A,ASAP1,PLD2,ACPP,AKT1,SLC25A6,DAG1,GTF3A,REG3A,USO1,ASAP2,CYTH2,ACTR2,ARFGEF1,MRPS30,PAPOLA,PDAP1,TUSC2,ANGPTL2,ATP8A2,AICDA,ARHGAP21,PTGES2,MTG1,CARD16,ARF1P1                                                                                                                                                                                                                                                                          |
| Arf1 pathway                                                              | NCK1,NRP2,NRP1,PIK3R1,CD2AP,CBL,GAB1,PDK1,HIF1A,AKT1,KRIT1,DAG1,DECR1,FLT1,NELL1,NELL2,PDPK1,PGF,PIK3CA,PIK3CB,PIK3CD,PIK3CG,PTPN11,RASA1,THOC1,IGKV1D-39,PIGU,SIRPA                                                                                                                                                                                                                                                                                                                           |
| VEGFR1 specific signals                                                   | TRAF2,FADD,TRADD,DAP3,AGFG1,MAP3K1,PIK3CA,PIK3CB,PIK3CD,PIK3CG,MAPK8,MAP2K4,SMPD1,IKBKG,RIPK1,TNFSF10,TNFRSF10D,TNFRSF10C,TNFRSF10B,TNFRSF10A,THOC1,TANK,DLGAP3,RPAIN,MTG1,SIRPA,H19                                                                                                                                                                                                                                                                                                           |
| TRAIL signaling pathway                                                   | RHOA,CDC42,RAC1,CRK,IQGAP1,STAT5A,ARPC3,ARPC4,ARPC5,ARPC1B,ARPC2,PAK1,STAT3,NOXO1,NOX1,NOXA1,SRA1,ABI2,ABI1,PIP5K1B,PIP5K1C,JUN,ATF2,MAP3K11,PIP5K1A,LIMK1,PAK2,IQGAP3,ADRA1D,ARHGDI1A,GDNF,IL8,MAP3K1,NAP1L1,PKN1,PKN2,MAPK8,MAPK9,MAP2K7,MAP2K4,SOX9,WASF1,NAPSA,ACTR3,ACTR2,WASF2,BAIAP2,CHERP,NCKAP1,CYFIP1,ANGPTL2,C9orf156,AICDA,SCAF1,AZI2,NA25,MTG1,APOBEC3A,TAB3                                                                                                                      |
| RAC1 signaling pathway                                                    |                                                                                                                                                                                                                                                                                                                                                                                                                                                                                                |
| alpha-synuclein and parkin-mediated proteolysis in parkinson's disease    | SNCA,PARK2                                                                                                                                                                                                                                                                                                                                                                                                                                                                                     |
| phosphorylation of mek1 by cdk5/p35 down regulates the map kinase pathway | NGFR,GRB2,SHC1,SOS1,CDK5R1,CDK5,EGR1,MAP2K2,HRAS,RAF1,MAP2K1,MAPK3,MAPK1,NGF,FCN2,GCHFR,IL12A,UPK3B                                                                                                                                                                                                                                                                                                                                                                                            |
|                                                                           | CDK2,E2F5,E2F6,E2F3,TFE3,RB1,E2F1,TOPBP1,E2F4,TRRAP,RYBP,YY1,E2F2,CEBPA,HDAC1,RBBP4,E2F7,CDKN2C,MCM3,BRCA1,HBP1,MCL1,PRMT5,CDC6,CDC25A,CDK1,XRCC1,SIRT1,TK1,HIC1,RANBP1,DHFR,MYC,SP1,ATM,APAF1,APC,CACNA1C,CDKN1B,CDKN2A,CDKN3,CREBBP,DSP,EIF4E,FGF4,KAT2A,GCY,MAD2L1,MXI1,MYBL2,ORC1,SERPINE1,SERPINB2,PLAU,POLA1,PRB3,PSG1,PTGDR,RBBP8,OPN1LW,RRM1,RRM2,SMARCA2,SRPR,SULT2A1,TBXAS1,TFDP1,TFDP2,TP73,TYMS,REEP5,PRRC2A,UXT,KAT2B,WASF1,TRIM28,PTGDR2,KIAA1549L,PAG1,PCBP4,PRAP1,DAND5,CRYGEP |
| E2F transcription factor network                                          | GNAS,GNGT1,GNB1,AP2A1,AP2M1,ARRB1,DNM1,PPARA,ADRBK1,GTF3A,FZD4,LPAR3,LGR6,MTG1,MRGPRX3,MRGPRX4,GPR151,OXER1,GPRC6A,MRGPRX1,VN1R17P,GPR166P                                                                                                                                                                                                                                                                                                                                                     |
| beta-arrestins in gpcr desensitization                                    | TYK2,IL12RB1,JAK2,IL12RB2,JUN,ETV5,MAP2K6,MAPK8,MAPK14,CCR5,IFNG,IL18R1,STAT4                                                                                                                                                                                                                                                                                                                                                                                                                  |
| il12 and stat4 dependent signaling pathway in th1 development             | TLR4,MYD88,TRAF6,IRAK1,IL1R1,FADD,TRADD,TNF,RIPK1,IL1A,RELA,NFKB1,MAP3K7,MAP4K4,MAP3K1,CHUK,NFKBIA,IKBKB,IKBKG,TAB1,CDH13,AGFG1,IL1B,IRF6,NR2C2,ARHGEF7,MAP3K14,SCYL1,RPAIN                                                                                                                                                                                                                                                                                                                    |
| nf-kb signaling pathway                                                   |                                                                                                                                                                                                                                                                                                                                                                                                                                                                                                |
| tsp-1 induced apoptosis in microvascular endothelial cell                 | FOS,JUN,CD36,FYN,GZMA,CASP3,MAPK14,FOSB,JUNB,JUND,THBS1                                                                                                                                                                                                                                                                                                                                                                                                                                        |
|                                                                           | PIK3R1,PIK3CA,CAMK4,GATA4,MEF2C,HDAC5,CALR,ELSPBP1,NKX2-5,HAND2,HAND1,CREBBP,PPP3CA,PPP3CC,PPP3CB,HDAC9,YWHAH,GRB2,SOS1,SHC1,RPS6KB1,GSK3B,MYL2,ACTA1,ADSS,HRAS,PDPK1,AKT1,MAPK8,EDN1,TNF,CALCR,KRIT1,EIF4E,PIK3CB,PIK3CD,PIK3CG,OPN1LW,SLC6A8,CAMK1,CAMKK2,YWHAQ,PAG1,PCBP4,MTG1                                                                                                                                                                                                              |
| nfat and hypertrophy of the heart                                         |                                                                                                                                                                                                                                                                                                                                                                                                                                                                                                |

|                                                                 |                                                                                                                                                                                                                                                                                                                                |
|-----------------------------------------------------------------|--------------------------------------------------------------------------------------------------------------------------------------------------------------------------------------------------------------------------------------------------------------------------------------------------------------------------------|
|                                                                 | PDK1,GRB2,SOS1,CD28,CD3E,CD3G,CD3D,RAP1A,VAV1,GRAP2,LAT,CBL,CD8B,LCK,CD8A,FYN,AKT1,PAG1,CSK,BCL10,CARD11,TRAF6,MALT1,RASGRP1,ORAI1,STIM1,CD247,MAP3K8,CRAT,DAG1,LCP2,PDPK1,PTPN6,PTPRC,SHC1,ZAP70,NROB2,IKBK,MAP3K14,MAP4K4,RASGRP2,ORC3,CROT,TRPV6,RASSF5,SPNS1,MTG1,TARP                                                     |
| TCR signaling in naive CD8+ T cells                             | RAD50,MRE11A,NBN,RAD17,RAD9A,RAD1,HUS1,BRCA2,RAD51,FANCD2,FANCA,FANCF,FANCG,FANCC,FANCE,ATM,TREX1,ATR,BRCA1,CHEK2,CHEK1,TP53,ATRIP,ERCC4,RRAD,ARTN,NLRP2,ANTXR1,MMAB,SERPINA2P                                                                                                                                                 |
| role of brca1 brca2 and atr in cancer susceptibility            | DICER1,AGO2,SCPEP1                                                                                                                                                                                                                                                                                                             |
| dicer pathway                                                   | TPX2,GADD45A,TACC3,NDEL1,AJUBA,TRAP,TACC1,PAK1,GIT1,BRCA1,MDM2,APC,AURKAIP1,CDC25B,AKT1,ACP5,CD40LG,CENPA,PPP2R4,PKN1,PROC,RASA1,TP53,TRAF2,PRRC2A,DLGAP5,CKAP5,TDRD7,KIAA1549L,FZR1,SCYL1,CPEB1,SPANXC,CRYGEP                                                                                                                 |
| Aurora A signaling                                              | PIK3R1,PIK3CA,NMI,CREBBP,EP300,IL7R,JAK1,ITGA2B,IL2RG,JAK3,BCL2,PTK2B,LCK,FYN,EIF4E,IL7,MYO1C,PIK3CB,PIK3CD,PIK3CG,OPN1LW,STAT5A,STAT5B,PAG1,PCBP4                                                                                                                                                                             |
| il-7 signal transduction                                        | IQGAP1,NDEL1,MAP1B,CDK5,CDK5R1,NUDC,RELN,VLDLR,DAB1,PAFAH1B3,PAFAH1B2,LRP8,LRPAP1,DCX,RHOA,CDC42,RAC1,KRIT1,CSNK2A1,FCN2,GCHFR,IL12A,PAFAH1B1,PPA1,PPP2R4,NPY4R,CLIP1,PLA2G7,CDK5R2,ATP6V0D1,UPK3B,OMA1,DNAAF3                                                                                                                 |
| Lissencephaly gene (LIS1) in neuronal migration and development | STAT5A,CSF2RB,SYK,LYN,YWHAZ,JAK2,GRB2,SOS1,PIK3R1,GAB2,PIM1,CCL2,FOS,CISH,OSM,RAF1,CSF2,IRF8,INPP5D,PIK3CA,PIK3CB,PIK3CD,PIK3CG,PTPN11,SHC1,STAT5B,LONP1,THOC1,CCM2,MTG1,SIRPA                                                                                                                                                 |
| GMCSF-mediated signaling events                                 | RASA1,KHDRBS1,SRC,MAP2K2,MAP2K1,HRAS,RAF1,MAPK1,MAPK3,CDK1,POLD1,SYNGAP1                                                                                                                                                                                                                                                       |
| regulation of splicing through sam68                            | RELA,MADD,TRAF1,TRAF2,TRADD,FADD,BAG4,STAT1,RFFL,CYLD,BIRC3,ETFA,ETFB,ETFDH,GTF2H1,AGFG1,MAP3K1,MAP3K3,MAP3K5,MAP2K3,MAP2K7,SMPD1,SMPD2,ADAM17,MAP3K7,TNFAIP3,TNFRSF1B,NR2C2,TXN,NSMAF,IKBK,RIK1,TANK,GNB2L1,CNTRL,IGKV1-27,DCTN4,VAC14,RPAIN,H19                                                                              |
| TNF receptor signaling pathway                                  |                                                                                                                                                                                                                                                                                                                                |
| Androgen-mediated signaling                                     | PIK3R1,PIK3CA,CD79B,BCR,CD79A,TGFB1,TGFB2,CDKN1B,CDKN2A,PTEN,RPS6KB1,CTCF,MYC,MDM2,PPP2R5D,MTOR,PIK3CB,PIK3CD,PIK3CG                                                                                                                                                                                                           |
| ctcf: first multivalent nuclear factor                          | JUNB,FOS,FOSB,JUND,JUN,PDGFRA,CRKL,CRK,SHB,PIK3R1,SRF,ELK1,SOS1,GRB2,SHF,JAK1,CSNK2A1,DAG1,FOSL2,RAPGEF1,PIK3CA,PIK3CB,PIK3CD,PIK3CG,SHC1,FOSL1,THOC1,RNASEH2A,KCNH4,DYT10,PRRT2,KCNH8,SIRPA                                                                                                                                   |
| PDGFR-alpha signaling pathway.1                                 | CDC42,RHOA,ARAP3,RAP1A,PDK1,SRC,ARF1,RAC1,ARF6,ARF5,SGK1,PAK1,PTEN,DAG1,FOXO3,PDPK1,PIK3CA,PIK3CB,PIK3CD,PIK3CG,PKN1,CYTH3,CYTH2,THOC1,ADAP1,DAPP1,MTG1,SIRPA,ARF1P1                                                                                                                                                           |
| Class I PI3K signaling events.1                                 | CAMK4,CCNB1,TUBB1,STMN1,CD2,PRKAR2B,PRKACB,PRKAR2A,PRKAR1B,PRKAR1A,PRKACG,MAPK13,KRIT1,CD247,CDK1,POLD1,MTG1,TUBB                                                                                                                                                                                                              |
| stathmin and breast cancer resistance to antimicrotubule agents | TGFB2,APP,GPC1,SLIT2,FGFR1,FGF2,TGFB1,PLA2G2A,NRG1,SMAD2,SERPINC1,FGF13,FLT1,TDGF1,TDGF1P3,TGFB1                                                                                                                                                                                                                               |
| Glypican 1 network                                              | GNGT1,GNB1,TUB,NAQ,FZD4,LPAR3,LGR6,MRGPRX3,MRGPRX4,GPR151,OXER1,GPRC6A,MRGPRX1,VN1R17P,GPR166P                                                                                                                                                                                                                                 |
| g-protein signaling through tubby proteins                      | INCENP                                                                                                                                                                                                                                                                                                                         |
| Aurora C signaling                                              | RHOA,CDC42,CBL,CSF1R,ANGPTL3,CD47,TGFB2,RAC1,PIK3R1,IRS1,IGF1,SRC,PAK1,AKT1,PIK3C2A,VAV3,FGF2,RHO,ILK,ADRA1D,CDKN1B,CSE1L,CTNND1,PTK2B,FGF13,KDR,PIK3CA,PIK3CB,PIK3CD,PIK3CG,PI4KA,PKN1,PTK2,PTPN11,VEGFA,BCAR1,THOC1,EDIL3,MTG1,SIRPA                                                                                         |
| Integrins in angiogenesis                                       | CXCR4,MTOR,RICTOR,CD3D,CD4,CD3G,CD3E,LCK,GNB1,GNG2,RAP1B,JAK2,DNM1,RALB,PAG1,CSK,CRK,VAV1,RGS1,STAT2,PDK1,GRK6,PTEN,FOXO1,BAD,ITCH,HGS,PAK1,LIMK1,AKT1,ADRA1D,ADRBK1,CD247,ATF6B,DAG1,PTK2B,INPP5D,PDPK1,PIK3CA,PIK3CB,PIK3CD,PIK3CG,PKN1,PTK2,PTPRC,CXCL12,THOC1,GNB2L1,GNA13,VPS4A,UBQLN1,SSH1,MLST8,MAPKAP1,MTG1,SIRPA,TARP |
| CXCR4-mediated signaling events                                 | PIK3R1,PIK3CA,FOS,JUN,NGFR,GRB2,SOS1,SHC1,ELK1,MAP2K1,MAPK8,CSNK2A1,RAF1,PLCG1,MAPK3,HRAS,NGF,CSNK2A2,DAG1,FOSB,JUNB,JUND,PIK3CB,PIK3CD,PIK3CG,KCNH4,MTG1,KCNH8                                                                                                                                                                |
| nerve growth factor pathway (ngf)                               | HRAS,SOS1,GRB2,EGFR,EGF,MTOR,EDN1,EDNRA,SHC1,MTG1                                                                                                                                                                                                                                                                              |
| EGFR-dependent Endothelin signaling events                      |                                                                                                                                                                                                                                                                                                                                |

|                                                                                |                                                                                                                                                                                                                                                                                                                                                                                                                                                                                                                                                                                                                                                                                                                                                                                                                                             |
|--------------------------------------------------------------------------------|---------------------------------------------------------------------------------------------------------------------------------------------------------------------------------------------------------------------------------------------------------------------------------------------------------------------------------------------------------------------------------------------------------------------------------------------------------------------------------------------------------------------------------------------------------------------------------------------------------------------------------------------------------------------------------------------------------------------------------------------------------------------------------------------------------------------------------------------|
| IL2 signaling events mediated by STAT5                                         | STAT5A,JAK3,GAB2,PIK3R1,SOS1,GRB2,IL2,LCK,JAK1,SP1,FASLG,FOXP3,IL4,ELF1,CDK6,BCL2,MYC,LTA,PIK3CA,PIK3CB,PIK3CD,PIK3CG,PRB3,PSG1,PTPN11,SHC1,ELOF1,DAND5                                                                                                                                                                                                                                                                                                                                                                                                                                                                                                                                                                                                                                                                                     |
| keratinocyte differentiation                                                   | RELA,RIPK1,TRAF2,MAP3K5,TNF,FASLG,DAXX,FAS,NFKBIA,SP1,CEBPA,FOS,JUN,GRB2,SOS1,SHC1,EGF,EGFR,BCL2,RAF1,PPP2R5D,MAP2K4,MAPK8,MAPK3,MAP3K1,BIRC3,BIRC2,TRAF1,HOXA7,MAPK13,MAPK14,MAP2K6,MAP2K3,MAPK1,MAP4K4,MAP2K2,MAP2K1,HRAS,PLAT,MAP2K7,FASN,FOSB,AGFG1,JUNB,JUND,PSG1,ARHGFE7,ANK,SPANXC,RPAIN,MTG1,DAND5                                                                                                                                                                                                                                                                                                                                                                                                                                                                                                                                  |
| FGF signaling pathway                                                          | FGFR4,FGF1,FGF9,FGF16,FGF6,FGF8,FGF17,FGF18,FGF2,FGF4,JUN,JUNB,FOS,FOSB,JUND,FGF3,FGF10,FGF5,GRB2,PAK4,FGF19,FGF23,SRC,CBL,FRS2,FGFR1,FGFR2,SOS1,MET,HGF,PIK3R1,GAB1,STAT5B,AKT1,PKD1,STAT1,RUNX2,A1BG,ADRA1D,CTNND1,DAG1,PTK2B,FGF13,FOSL2,IL6,NCAM1,PDPK1,PIK3CA,PIK3CB,PIK3CD,PIK3CG,PLAU,PTPN11,SHC1,TFCP2,FOSL1,RNMT,THOC1,RNASEH2A,ATP8A2,IL17RD,PRAP1,PIGU,SIRPA                                                                                                                                                                                                                                                                                                                                                                                                                                                                     |
| Presenilin action in Notch and Wnt signaling                                   | JUNB,FOS,FOSB,JUND,JUN,APC,AXIN1,PSEN1,NCSTN,APH1A,PSENE1,APH1B,DVL1,LRP6,FZD1,WNT1,DKK2,TLE1,AES,DKK1,FRAT1,NEDD4,TAB1,ADAM10,HDAC1,SMAD4,MYC,CREBBP,CSNK2A1,EIF4E,FOSL2,RBPJ,PPP2R4,MAPK1,MAPK3,PROC,OPN1LW,MAP3K7,HNF1A,NR2C2,FOSL1,DVL1P1,RNASEH2A,PAG1,PCBP4                                                                                                                                                                                                                                                                                                                                                                                                                                                                                                                                                                           |
| FOXM1 transcription factor network                                             | RB1,SP1,CDK1,CDK4,HIST1H2BA,FOS,MYC,CENPF,PLK1,GAS1,NEK2,CDC25B,XRCC1,BRCA2,GSK3A,TGFA,FOXM1,SKP2,CDKN2A,CENPA,CKS1B,CREBBP,EIF4E,ETV5,ONECUT1,HSPA1A,NFATC3,MAP2K1,PSG1,OPN1LW,PRRC2A,CHEK2,KIAA1549L,PAG1,PCBP4,CKS1BP7,DAND5,CRYGEP                                                                                                                                                                                                                                                                                                                                                                                                                                                                                                                                                                                                      |
| lissencephaly gene (lis1) in neuronal migration and development                | NDEL1,LRP8,RELN,CDK5R1,CDK5,CSNK2A1,DCX,ABL1,CSNK2A2,FCN2,GCHFR,IL12A,PAFAH1B1,CLIP1,UPK3B                                                                                                                                                                                                                                                                                                                                                                                                                                                                                                                                                                                                                                                                                                                                                  |
| overview of telomerase protein component gene htert transcriptional regulation | SP1,HDAC1,MXD1,MAX,MYC,ESR1,TP53,WT1,TERT,AMPD1,PSG1,MZF1,HDAC9,DAND5                                                                                                                                                                                                                                                                                                                                                                                                                                                                                                                                                                                                                                                                                                                                                                       |
| cdk regulation of dna replication                                              | CDK2,CCNE1,CDT1,CDC6,MCM2,MCM6,MCM7,MCM3,MCM5,MCM4,KITLG,CDKN1B,IFI27,ORC1,ORC2,ORC4,ORC5,ORC6,ORC3                                                                                                                                                                                                                                                                                                                                                                                                                                                                                                                                                                                                                                                                                                                                         |
| reversal of insulin resistance by leptin                                       | PRKAG1,PRKAG2,PRKAA1,PRKAA2,PRKAB1,PRKAB2,LEP,LEPR,ACACA,CPT1A,LEPROT                                                                                                                                                                                                                                                                                                                                                                                                                                                                                                                                                                                                                                                                                                                                                                       |
| role of nicotinic acetylcholine receptors in the regulation of apoptosis       | PIK3R1,PIK3CA,SRC,RAPSN,MUSK,CHRN1,CHRNA1,CHRNA2,CHRNA3,CHRNA4,CHRNA5,CHRNA7,CHRNA8,CHRNA9,CHRNA10,CHRNA12,CHRNA13,CHRNA14,CHRNA15,CHRNA16,CHRNA17,CHRNA18,CHRNA19,CHRNA20,CHRNA21,CHRNA22,CHRNA23,CHRNA24,CHRNA25,CHRNA26,CHRNA27,CHRNA28,CHRNA29,CHRNA30,CHRNA31,CHRNA32,CHRNA33,CHRNA34,CHRNA35,CHRNA36,CHRNA37,CHRNA38,CHRNA39,CHRNA40,CHRNA41,CHRNA42,CHRNA43,CHRNA44,CHRNA45,CHRNA46,CHRNA47,CHRNA48,CHRNA49,CHRNA50,CHRNA51,CHRNA52,CHRNA53,CHRNA54,CHRNA55,CHRNA56,CHRNA57,CHRNA58,CHRNA59,CHRNA60,CHRNA61,CHRNA62,CHRNA63,CHRNA64,CHRNA65,CHRNA66,CHRNA67,CHRNA68,CHRNA69,CHRNA70,CHRNA71,CHRNA72,CHRNA73,CHRNA74,CHRNA75,CHRNA76,CHRNA77,CHRNA78,CHRNA79,CHRNA80,CHRNA81,CHRNA82,CHRNA83,CHRNA84,CHRNA85,CHRNA86,CHRNA87,CHRNA88,CHRNA89,CHRNA90,CHRNA91,CHRNA92,CHRNA93,CHRNA94,CHRNA95,CHRNA96,CHRNA97,CHRNA98,CHRNA99,CHRNA100 |
| IL12 signaling mediated by STAT4                                               | STAT4,JUN,CD28,CD4,CD3E,CD3G,CD3D,FOS,IL18R1,IL18,STAT3,TGFB1,IRF1,IL2,IL13,CD247,CREBBP,EIF4E,ETV5,OPN1LW,PAG1,PCBP4,TARP                                                                                                                                                                                                                                                                                                                                                                                                                                                                                                                                                                                                                                                                                                                  |
| Glypican 2 network                                                             | GPC2                                                                                                                                                                                                                                                                                                                                                                                                                                                                                                                                                                                                                                                                                                                                                                                                                                        |
| double stranded rna induced gene expression                                    | RELA,EIF2S1,EIF2S3,EIF2S2,NFKBIA,DNAJC3,IFNA1,IFNB1,TP53,MAP4K4,EIF2AK2,ARHGFE7                                                                                                                                                                                                                                                                                                                                                                                                                                                                                                                                                                                                                                                                                                                                                             |
| HIF-2-alpha transcription factor network                                       | ARNT,TCEB2,VHL,TCEB1,SIRT1,SP1,ELK1,ABCG2,DEC1,ADORA2A,PGK1,TWIST1,CITED2,EPO,ETS1,FXN,APEX1,CASR,CREBBP,DMRT1,EIF4E,EPAS1,FLT1,EIF3E,KDR,MMP14,SLC11A2,SERPINE1,SERPINE2,POU5F1,PSG1,OPN1LW,SLC2A1,TEAD1,TIMP1,TFPI2,EPX,BHLHE40,KCNH4,CHMP2B,INTS6,PAG1,PCBP4,KCNH8,DAND5,MIA3                                                                                                                                                                                                                                                                                                                                                                                                                                                                                                                                                            |
| wnt signaling pathway                                                          | LRP6,WNT1,FZD1,CTNBB1,BTRC,TLE1,CREBBP,SMAD4,CTBP1,KREMEN2,DKK2,DKK1,PROC,AXIN1,CSNK2A1,MAP3K7,PPP2R5D,HDAC1,GSK3B,WIF1,MYC,PPARD,CCND1,DVL1,FRAT1,NLK,APC,CSNK2A2,EIF4E,GPI,HNF4A,OPN1LW,HNF1A,DVL1P1,TAB1,PAG1,PCBP4                                                                                                                                                                                                                                                                                                                                                                                                                                                                                                                                                                                                                      |
| Regulation of RhoA activity                                                    | RAC1,PAK1,CDC42,RHOA,ARHGAP8,OBSCN,VAV3,ARHGAP9,ARAP3,TRIO,DEF6,VAV1,DLC1,VAV2,ARHGAP4,ARAP1,ARHGFE3,SRGAP1,ARHGFE12,ARHGFE17,NET1,ABR,ECT2,ARHGFE2,ARHGFE5,AKAP13,ARHGAP6,ARHGFE10,ARHGFE18,BCR,ARHGDIAC,DKN1B,DEFA6,LRP2,MCF2,PKN1,SLC6A2,DYNLL1,SLC6A5,ARHGAP32,DLEC1,TSPAN1,FARP1,MCF2L,NGEF,PRPF38B,MTG1,ARHGFE25                                                                                                                                                                                                                                                                                                                                                                                                                                                                                                                      |
| g-secretase mediated erbb4 signaling pathway                                   | ERBB4,PSEN1,ADAM17,DYT10,PRRT2                                                                                                                                                                                                                                                                                                                                                                                                                                                                                                                                                                                                                                                                                                                                                                                                              |
| egf signaling pathway                                                          | PIK3R1,PIK3CA,EGF,EGFR,STAT3,STAT1,GRB2,SOS1,SHC1,ELK1,JAK1,MAP2K1,PLCG1,MAP3K1,MAPK8,RASA1,HRAS,MAP2K4,DAG1,PIK3CB,PIK3CD,PIK3CG,SYNGAP1,KCNH4,DYT10,PRRT2,KCNH8                                                                                                                                                                                                                                                                                                                                                                                                                                                                                                                                                                                                                                                                           |
| corticosteroids and cardioprotection                                           | PIK3R1,PIK3CA,RELA,NR3C1,GNB1,GNGT1,ADRB2,GNAS,BDKRB2,CAV1,NOS3,CORIN,PDPK1,ANXA1,AKT1,KRIT1,HSP90AA1,HSP90AA2,PIK3CB,PIK3CD,PIK3CG,ARHGFE7,MTG1,NANOS3                                                                                                                                                                                                                                                                                                                                                                                                                                                                                                                                                                                                                                                                                     |

|                                                                                 |                                                                                                                                                                                                                                                                                                                                                                                                                                                                                                                                                                                                                                                                                                                                                                                                                                                                                    |
|---------------------------------------------------------------------------------|------------------------------------------------------------------------------------------------------------------------------------------------------------------------------------------------------------------------------------------------------------------------------------------------------------------------------------------------------------------------------------------------------------------------------------------------------------------------------------------------------------------------------------------------------------------------------------------------------------------------------------------------------------------------------------------------------------------------------------------------------------------------------------------------------------------------------------------------------------------------------------|
| HIV-1 Nef: Negative effector of Fas and TNF-alpha                               | FAS,DAXX,FADD,FASLG,BAG4,DFFB,RELA,TRAF1,TRAF2,TRADD,BCL2,BID,APAF1,BIRC3,CD247,DFFA,FASN,AGFG1,MAP3K5,MAPK8,MAP2K7,S100B,RIPK1,CRADD,MAP3K14,MAP4K4,TANK,RPAIN                                                                                                                                                                                                                                                                                                                                                                                                                                                                                                                                                                                                                                                                                                                    |
| how progesterone initiates the oocyte maturation LPA4-mediated signaling events | GNAI1,GNGT1,GNB1,PAQR5,CCNB1,PGR,SRC,PIN1,MYT1,GNAS,PRKAR2B,PRKACB,PRKAR2A,PRKAR1B,PRKAR1A,PRKACG,MAPK1,CAP1,CDC25C,HRAS,MAPK3,ADCY1,CAMP,CDK1,POLD1,PRSS8,TRAF3,PKMYT1,PGRMC1,PDZD2,ATP8A2,MTG1,CHAMP1 LPA,CREB1,CAMP,DAG1,LPAR4,RPS6KA5,CHAMP1                                                                                                                                                                                                                                                                                                                                                                                                                                                                                                                                                                                                                                   |
| Direct p53 effectors                                                            | MIR34A,MCL1,PRMT1,CARM1,SP1,TAF9,NFYA,NFYB,NFYC,DGCR8,DROSHA,JMY,RP S27L,EGFR,EPHA2,HGF,HIC1,POU4F2,PPM1J,DUSP5,FOXA1,TGFA,SCN3B,VDR,TAP1, TYRP1,S100A2,PML,BCL6,MAP4K4,PERP,BID,NDRG1,BTG2,BNIP3L,MET,IRF5,PIDD,I GFBP3,ATF3,COL18A1,RB1,PTEN,TSC2,PLK3,GPX1,PRKAB1,TRRAP,MDM2,LIF,FAS,BA X,JUN,HTT,PCNA,POU4F1,DDDB2,DKK1,FDXR,APC,HDAC2,BCL2,AFP,MSH2,MLH1,P MS2,GADD45A,CSE1L,APAF1,APCS,STS,BAK1,BDKRB2,PRDM1,CREBBP,VCAN,CYP27 B1,DBT,ARID3A,DSP,DUSP1,EDN2,EIF4E,FASN,HSPA1A,IL6,CD82,SH2D1A,SERPINE1, SERPINB2,PMAIP1,PROC,PSG1,PTGDR,OPN1LW,SNORA62,SLC6A4,SNAI2,SMARCA4 ,SOS1,SRPR,TFDP1,TP53,TP73,TRIM26,REEP5,PRRC2A,RNMT,TNFRSF10D,TNFRSF10 C,TNFRSF10B,TNFRSF10A,GDF15,TP53I3,CEBPZ,POLD3,SEC14L2,KIAA1549L,RCHY1, ZNF385A,SNORD12C,BBC3,SESN1,RGCC,PYCARD,RRM2B,TRIAP1,DDIT4,STEAP3,PA G1,PCBP4,C12orf5,NLRC4,RFWD2,BCL2L14,RNF39,AIFM2,TADA2B,CARD16,DAND5, CRYGEP |
| rho cell motility signaling pathway                                             | PFN1,DIAPH1,GSN,VCL,TLN1,PIP5K1B,PIP5K1A,PPP1R12B,MYL2,CFL1,LIMK1,ROCK1 ,RHOA,MYLK,PRF1,RASA1,VPS72,RGS6                                                                                                                                                                                                                                                                                                                                                                                                                                                                                                                                                                                                                                                                                                                                                                           |
| activation of pkc through g-protein coupled receptors                           | GNAQ,PLCB1,PPP1R14A,DAG1,FZD4,LPAR3,DYT10,LGR6,PRRT2,MRGPRX3,MRGPRX 4,GPR151,OXER1,GPRC6A,MRGPRX1,VN1R17P,GPR166P                                                                                                                                                                                                                                                                                                                                                                                                                                                                                                                                                                                                                                                                                                                                                                  |
| Ras signaling in the CD4+ TCR pathway                                           | ELK1,RAF1,FOS,BRAF,MAP3K8,MAP2K1,PTPN7,PTPRA,KCNH4,CROT,MTG1,KCNH8 CDC42,RHOA,RICTOR,MTOR,TSC1,TSC2,CDK2,DEPTOR,PDCD4,EIF4E,ATG13,RAC1,R HEB,YY1,BNIP3,PML,PAK1,AKT1,EEF2,EEF2K,PDK1,SGK1,IRS1,EIF4B,EIF4A1,EIF4A2,E IF4EBP1,PDPK1,PKN1,RHEBP1,CLIP1,SREBF1,EIF3A,RB1CC1,PPARGC1A,DDIT4,RRN3 ,PRR5,MLST8,MAPKAP1,POLDIP3,AKT1S1,MTG1                                                                                                                                                                                                                                                                                                                                                                                                                                                                                                                                               |
| mTOR signaling pathway                                                          | PRKAG1,PRKAG2,PRKAA1,PRKAA2,PRKAB1,PRKAB2,GNAS,GNGT1,GNB1,PRKAR2B,PR KACB,PRKAR2A,PRKAR1B,PRKAR1A,PRKACG,PKLR,ADCY1,PPP2R5D,CAMP,APRT,FZ D4,LPAR3,MLXIPL,ATP8A2,LGR6,MTG1,MRGPRX3,MRGPRX4,GPR151,OXER1,GPRC6 A,MRGPRX1,CHAMP1,VN1R17P,GPR166P                                                                                                                                                                                                                                                                                                                                                                                                                                                                                                                                                                                                                                      |
| chrebp regulation by carbohydrates and camp                                     | NUP62,NUP153,NUP214,NUP210,SUMO1,RANGAP1,RANBP2,MDM2,HDAC4,RAN,HD AC1,PIAS1,NPC1,UBE2I,MTG1                                                                                                                                                                                                                                                                                                                                                                                                                                                                                                                                                                                                                                                                                                                                                                                        |
| Sumoylation by RanBP2 regulates transcriptional repression                      | STAT5A,STAT1,VAV1,SOCS1,GRB2,CBL,CRKL,KIT,LYN,TEC,STAP1,PIK3R1,SPRED1,HR AS,SPRED2,SOS1,STAT3,EPO,EPOR,GRAP2,PTPRO,BCL2,MITF,BAD,FER,JAK2,MATK,P DK1,GRB10,RAF1,PTEN,GAB1,AKT1,KLK3,CREBBP,DOK1,EIF4E,FOXO3,KITLG,PDPK1, PIK3CA,PIK3CB,PIK3CD,PIK3CG,MAPK3,MAPK8,MAP2K1,MAP2K2,PTPN6,PTPN11,O PN1LW,SHC1,SNAI2,TIMP1,TOC,NR4A3,EPX,UXT,NR0B2,THOC1,SH2B3,PTPRU,SH2B 2,MAP4K1,DYT10,PAG1,PCBP4,MTG1,PRRT2,PIGU,SIRPA                                                                                                                                                                                                                                                                                                                                                                                                                                                                |
| Signaling events mediated by Stem cell factor receptor (c-Kit)                  | GATA1,HES1,MYB,RUNX2,RB1,PARP1,TLE1,PTF1A,AR,TCF3,HEY1,ARNT,HIF1A,HEY2, RBPJ,HES6,HDAC1,GATA6,GATA4,JAK2,GAA,PTGDS,GHR,TWIST1,YY1,CD4,ID1,E2F1, STAT3,AKR1B1,AREG,ASCL1,CDKN1B,CREBBP,RCAN1,EIF4E,KDR,MYOD1,RBBP8,OP N1LW,C21orf33,SPEN,KDM1A,PAG1,PCBP4,TCF7L1,MIA3                                                                                                                                                                                                                                                                                                                                                                                                                                                                                                                                                                                                               |
| Notch-mediated HES/HEY network                                                  | TRAF6,TRAF3,TRAF5,TNFRSF17,TNFSF13B,TRAF2,TNFRSF13B,TNFSF13,TANK,ANP32 B                                                                                                                                                                                                                                                                                                                                                                                                                                                                                                                                                                                                                                                                                                                                                                                                           |
| yaci and bcma stimulation of b cell immune responses                            | FGFR4,FGF1,FGF9,FGF16,FGF6,FGF8,FGF19,FGF17,FGF18,FGF2,FGF4,FGF3,FGF10,F GF5,FGF23,SRC,PSEN1,NCSTN,APH1A,PSENEN,APH1B,AGRP,MC4R,CASK,IL8,FYN,EG FR,FGF13,DYT10,PRRT2                                                                                                                                                                                                                                                                                                                                                                                                                                                                                                                                                                                                                                                                                                               |
| Syndecan-3-mediated signaling events                                            | RAN,RANGAP1,RANBP1,RANBP2,NUP62,NUP153,NUP214,NUP210,RCC1,NPC1,MT G1                                                                                                                                                                                                                                                                                                                                                                                                                                                                                                                                                                                                                                                                                                                                                                                                               |
| cycling of ran in nucleocytoplasmic transport                                   | GRIP1,CARM1,EP300,ESR1,CREBBP,GTF2F1,GTF2A1,NR3C1,GTF3A,POLR2A,GTF2E1, MEF2C,TBP,EIF4E,OPN1LW,NCOA2,PAG1,PCBP4,LGALS12                                                                                                                                                                                                                                                                                                                                                                                                                                                                                                                                                                                                                                                                                                                                                             |
| carm1 and regulation of the estrogen receptor                                   | GNB1,GNG2,CRH,MTG1                                                                                                                                                                                                                                                                                                                                                                                                                                                                                                                                                                                                                                                                                                                                                                                                                                                                 |
| Rapid glucocorticoid signaling                                                  |                                                                                                                                                                                                                                                                                                                                                                                                                                                                                                                                                                                                                                                                                                                                                                                                                                                                                    |

|                                                                                 |                                                                                                                                                                                                                                                                             |
|---------------------------------------------------------------------------------|-----------------------------------------------------------------------------------------------------------------------------------------------------------------------------------------------------------------------------------------------------------------------------|
| il-2 receptor beta chain in t cell activation                                   | PIK3R1,PIK3CA,NMI,TFDP1,E2F1,JAK3,IL2RG,IL2,IL2RB,IL2RA,JAK1,RB1,GRB2,SOS1,SHC1,RAF1,BCL2,PPIA,FASLG,FAS,FOS,MYC,PCNA,RPS6KB1,MAPK3,MAPK1,BCL2L1,MAP2K2,MAP2K1,PDPK1,HRAS,AKT1,SOCS3,SOCS1,PTPN6,BAD,CRKL,CBL,IRS1,FASN,MYO1C,PIK3CB,PIK3CD,PIK3CG,STAT5A,STAT5B,IKZF3,MTG1 |
| regulators of bone mineralization                                               | ALPL,ENPP1,IBSP,COL4A1,COL4A3,COL4A2,COL4A5,COL4A6,COL4A4,SPP1,ANKH,TNAP,APRT,GSTP1,SERPINA1,CXXC1,ATP8A2                                                                                                                                                                   |
| links between pyk2 and map kinases                                              | SRC,PTK2B,GNAQ,GRB2,SOS1,BCAR1,CRKL,SHC1,JUN,RAF1,MAP2K1,MAPK1,MAP2K4,MAPK8,MAP3K1,PAK1,PLCG1,MAPK3,MAP2K3,HRAS,RAC1,MAP2K2,MAPK14,KRIT1,DAG1,PKN1,FZD4,LPAR3,DYT10,LGR6,PRRT2,MRGPRX3,MRGPRX4,GPR151,OXER1,GPRC6A,MRGPRX1,VN1R17P,GPR166P                                  |
| role of pi3k subunit p85 in regulation of actin organization and cell migration | PIK3R1,PIK3CA,ACTR2,ARPC4,ARPC3,ARPC2,ARPC1A,ACTR3,ARPC1B,PDGFA,PDGFR A,RAC1,PAK1,RHOA,WASL,CDC42,SLC25A6,PIK3CB,PIK3CD,PIK3CG,PKN1,ANGPTL2,AICDA                                                                                                                           |
| CIN                                                                             | CENPA,DLGAP5,MELK,BUB1,KIF2C,KIF20A,KIF4A,CCNA2,CCNB2,NCAPG                                                                                                                                                                                                                 |
| MES                                                                             | COL5A2,VCAN,SPARC,THBS2,FBN1,COL1A2,COL5A1,FAP,AEBP1,CTSK                                                                                                                                                                                                                   |
| LYM                                                                             | PTPRC,CD53,LCP2,LAPTM5,DOCK2,IL10RA,CYBB,CD48,ITGB2,EVI2B                                                                                                                                                                                                                   |
| ER                                                                              | AGR3,CA12,FOXA1,GATA3,MLPH,AGR2,ESR1,TBC1D9                                                                                                                                                                                                                                 |
| HER2                                                                            | ERBB2,PGAP3,STARD3,MIEN1,GRB7,PSMD3,GSDMB                                                                                                                                                                                                                                   |
| Adipocyte                                                                       | ADIPOQ,ADH1B,FABP4,PLIN1,RBP4,PLIN4,G0S2,GPD1,CD36,AOC3                                                                                                                                                                                                                     |
| Chr8q24.3                                                                       | EXOSC4,PUF60,BOP1,SLC52A2,SHARPIN,HSF1,FBXL6,CYC1,SCRIB,GPA1                                                                                                                                                                                                                |
| Chr7p11.2                                                                       | MRPS17,LANCL2,SEC61G,CCT6A,CHCHD2,EGFR                                                                                                                                                                                                                                      |
| ZMYND10                                                                         | ZMYND10,LRRC48,CASC1                                                                                                                                                                                                                                                        |
| FGD3-SUSD3                                                                      | FGD3,SUSD3                                                                                                                                                                                                                                                                  |
| PGR-RAI2                                                                        | PGR,RAI2                                                                                                                                                                                                                                                                    |
| Chr15q26.1                                                                      | PRC1,BLM,FANCI                                                                                                                                                                                                                                                              |
| hotnet 1                                                                        | HIF3A,RPS6KA1,EPAS1,PHF17,VBP1,PPP1R3A,TOB2,NR4A3,TCEB1,HIF1A,VHL,POLR2G,RNF139,USP33,CUL2                                                                                                                                                                                  |
| hotnet 2                                                                        | NRG1,NRG3,NRG2,ERBB4                                                                                                                                                                                                                                                        |
| hotnet 3                                                                        | FGFR2,FGFR4,CDH2,FGF3,FGF2                                                                                                                                                                                                                                                  |
| hotnet 4                                                                        | ARID1A,SMARCA4,MLLT1,PBRM1                                                                                                                                                                                                                                                  |
| hotnet 5                                                                        | EPHA6,EFNA4                                                                                                                                                                                                                                                                 |
| hotnet 6                                                                        | PTPRN2,SPTBN4,CKAP5                                                                                                                                                                                                                                                         |
| hotnet 7                                                                        | DST,CELSR3,KIAA1549,KRT5,COL17A1                                                                                                                                                                                                                                            |
| hotnet 8                                                                        | NUDC,PAFAH1B1                                                                                                                                                                                                                                                               |
| hotnet 9                                                                        | NR1I3,NROB2,NR5A2                                                                                                                                                                                                                                                           |
| hotnet 10                                                                       | RARA,NSD1,ZNF496,THRA                                                                                                                                                                                                                                                       |
| hotnet 11                                                                       | MFAP5,FBN2,MFAP2,LTBP1,FBN1                                                                                                                                                                                                                                                 |
| hotnet 12                                                                       | MAX,MAGEA11,MXD3                                                                                                                                                                                                                                                            |
| hotnet 13                                                                       | SEC13,SEC16B,SEC31A                                                                                                                                                                                                                                                         |
| hotnet 14                                                                       | C3orf10,NCKAP1                                                                                                                                                                                                                                                              |
| hotnet 15                                                                       | TESC,SLC9A1,MAP4K4                                                                                                                                                                                                                                                          |
| hotnet 16                                                                       | DHDDS,LOX                                                                                                                                                                                                                                                                   |
| hotnet 17                                                                       | COL4A3,USH2A                                                                                                                                                                                                                                                                |
| hotnet 18                                                                       | TRAPPC2,CLIC2                                                                                                                                                                                                                                                               |
| hotnet 19                                                                       | PCSK6,FLG                                                                                                                                                                                                                                                                   |
| hotnet 20                                                                       | SFN,CHST1                                                                                                                                                                                                                                                                   |
| hotnet 21                                                                       | PTPRD,PPFIA2,PPFIA3,MTSS1,PPFIA1                                                                                                                                                                                                                                            |
| hotnet 22                                                                       | CIC,SETD2                                                                                                                                                                                                                                                                   |
| hotnet 23                                                                       | XPO5,ZNF346,ILF3                                                                                                                                                                                                                                                            |
| hotnet 24                                                                       | ACE2,GHRL                                                                                                                                                                                                                                                                   |
| hotnet 25                                                                       | PKHD1,CAMLG                                                                                                                                                                                                                                                                 |
| BIOCARTA_REL_PATHWAY                                                            | IKBKG,CHUK,EP300,RELA,TNF,IKKBK,TNFRSF1B,HDAC3,TNFRSF1A,TRAF6,FADD,CREBBP,RIPK1,NFKB1,NFKBIA,TRADD                                                                                                                                                                          |
| BIOCARTA_NO1_PATHWAY                                                            | PDE3B,CALM2,ACTA1,LOC124827,CALM1,PRKAR2B,KNG1,RYR2,CHRM1,VEGFA,HSP90AA1,SLC7A1,PDE3A,PDE2A,BDKRB2,LOC147908,CYCSP35,NOS3,CHRNA1,FLT1,KDR,PRKACB,TNNI1,PRKACG,FLT4,CAV1,AKT1,PRKAR1A,PRKAR2A,PRKAR1B,CALM3,PRKG1,PRKG2                                                      |



|                                    |                                                                                                                                                                                                                                                                                                                 |
|------------------------------------|-----------------------------------------------------------------------------------------------------------------------------------------------------------------------------------------------------------------------------------------------------------------------------------------------------------------|
|                                    | ZAP70,CSK,CD4,PRKAR2B,PRKACB,CD3D,PRKACG,CD3E,CD3G,GNAS,GNGT1,TRB@,GNB1,TRA@,PRKAR1A,PRKAR2A,CD247,CREBBP,PRKAR1B,ADCY1,LCK,PTPRC,HLA-DRB1,HLA-DRA                                                                                                                                                              |
| BIOCARTA_CSK_PATHWAY               |                                                                                                                                                                                                                                                                                                                 |
| BIOCARTA_SRCRPTP_PATHWAY           | CSK,SRC,CDC25B,CDC25C,PRKCB,GRB2,CDC25A,PRKCA,CCNB1,PTPRA,CDK1<br>F10,TFPI,F2,COL4A1,F2R,COL4A2,COL4A3,COL4A4,PROS1,FGG,PROC,FGA,PLG,SERP<br>INC1,FGB,PLAT,COL4A6,AHSP,COL4A5,F7                                                                                                                                |
| BIOCARTA_AMI_PATHWAY               |                                                                                                                                                                                                                                                                                                                 |
| BIOCARTA_GNULOCYTES_PATHWAY        | PECAM1,TNF,IL1A,ITGAL,ITGAM,ICAM1,SELL,SELP,IFNG,SELPLG,C5,ITGB2,CSF3,IL8                                                                                                                                                                                                                                       |
| BIOCARTA_LYM_PATHWAY               | SELL,VCAM1,ITGA4,ITGB1,ITGB2,PECAM1,IL1A,ITGAL,CD34,IL8,ICAM1                                                                                                                                                                                                                                                   |
| BIOCARTA_ARAP_PATHWAY              | ASAP2,CYTH3,CYTH2,CYTH1,ARFGAP1,ARFGAP3,COPA,COP,CYTH4,KDELRL3,GBF1,K<br>DELRL1,ARF1,ARFGEF2,CLTB,KDELRL2,ARFGEF1,GPLD1                                                                                                                                                                                         |
| BIOCARTA_AGR_PATHWAY               | JUN,MAPK8,PAK3,ACTA1,EGFR,NRG1,RAPSN,DAG1,CHRM1,PAK2,LAMA3,LAMA2,P<br>AK4,UTRN,PXN,NRG3,PAK7,DMD,CTTN,SRC,PTK2,ITGA1,CHRNA1,PAK1,SP1,GIT2,D<br>VL1,NRG2,MUSK,ITGB1,MAPK3,LAMA4,RAC1,PAK6,CDC42,MAPK1                                                                                                            |
| BIOCARTA_AKAP95_PATHWAY            | PRKAG1,PPP2CA,PRKAR2A,PPP1CA,PRKAR2B,DDX5,PRKACB,PRKACG,CCNB1,AKAP8<br>,NCAPD2,CDK1                                                                                                                                                                                                                             |
| BIOCARTA_AKT_PATHWAY               | CASP9,IKBKG,FOXO4,CHUK,FOXO1,FOXO3,RELA,PDPK1,GHR,IKKBK,AKT1,PIK3CA,G<br>H1,PPP2CA,FASLG,HSP90AA1,YWHAH,BAD,NFKB1,PIK3CG,PIK3R1,NFKBIA                                                                                                                                                                          |
| BIOCARTA_ALK_PATHWAY               | MEF2C,WNT1,NPPB,NPPA,NOG,GSK3B,GATA4,CTNNB1,TGFB2,CHRD,HNF1A,MYL2,<br>TGFB1,FZD1,ATF2,SMAD5,TGFB3,TGFB2,TGFB1,NKX2-<br>5,TGFB3,SMAD6,BMPR2,BMPR1A,ACVR1,RFC1,BMP4,APC,BMP2,MAP3K7,BMP7,D<br>VL1,BMP5,BMP10,AXIN1,SMAD4,SMAD1                                                                                    |
| BIOCARTA_AT1R_PATHWAY              | JUN,MEF2C,MEF2D,HRAS,CALM2,MAPK8,MEF2BNB-<br>MEF2B,RAF1,LOC124827,PRKCB,MEF2A,SHC1,EGFR,ELK1,PRKCA,CALM1,MAP2K4,A<br>TF2,LOC147908,CYCSP35,SRC,PTK2,MAP2K2,MAP3K1,MAP2K1,GNAQ,PAK1,AGT,G<br>RB2,AGTR1,MAPK3,CALM3,PTK2B,RAC1,SOS1,MAPK1                                                                         |
| BIOCARTA_ACE2_PATHWAY              | ACE2,COL4A1,COL4A2,REN,COL4A3,COL4A4,CMA1,AGT,AGTR1,ACE,AGTR2,COL4A6<br>,COL4A5                                                                                                                                                                                                                                 |
| BIOCARTA_ASBCCELL_PATHWAY          | CD40LG,CD40,CD4,FAS,CD80,FASLG,CD28,IL4,IL10,HLA-DRB1,HLA-DRA,IL2                                                                                                                                                                                                                                               |
| BIOCARTA_DNAFRAGMENT_PATHWAY       | DFFA,DFFB,CASP7,HMGB2,HMGB1,GZMB,TOP2B,ENDOG,TOP2A,CASP3<br>CASP9,PTK2,BCL2,CASP7,BID,PRKCB,BCL2L1,STAT1,PRKCA,APAF1,BAX,EIF2S1,CASP<br>6,AKT1,TP53,CASP3,CYCS,ATM,TLN1,BAD,PXN,PARP1                                                                                                                           |
| BIOCARTA_CHEMICAL_PATHWAY          | SRC,HRAS,PTK2,F2,ITGA1,PLCB1,RAF1,PRKCB,F2R,PLA2G4A,PRKCA,PTGS1,MAP2K1,<br>GNAI1,GNGT1,ITGB1,GNB1,SYK,TBXAS1,F2RL3,MAPK3,MAPK1                                                                                                                                                                                  |
| BIOCARTA_SPPA_PATHWAY              | JUN,CHEK2,MAPK8,MRE11A,BRCA1,NBN,RELA,CHEK1,MDM2,ABL1,CDKN1A,TP53,<br>GADD45A,ATM,RAD51,TP73,RAD50,NFKB1,NFKBIA,RBBP8                                                                                                                                                                                           |
| BIOCARTA_ATM_PATHWAY               | PRKCB,PRKCA,PRKAR2B,PRKACB,PRKACG,GNAS,ARRB1,GNGT1,GNB1,PRKAR1A,PRK<br>AR2A,PRKAR1B,GRK4                                                                                                                                                                                                                        |
| BIOCARTA_AGPCR_PATHWAY             | CASP7,ITGA1,BIRC5,XIAP,AKT1,CASP3,JUND,MTOR,CCT4,DPF2,PIK3CA,ITGB1,ZBTB7<br>A,FOS,PIK3CG,PIK3R1                                                                                                                                                                                                                 |
| BIOCARTA_BCELLSURVIVAL_PATHWAY     |                                                                                                                                                                                                                                                                                                                 |
| BIOCARTA_BLYMPHOCYTE_PATHWAY       | CD40,CD80,ITGB2,CR1,ITGAL,PTPRC,HLA-DRB1,CR2,HLA-DRA,ICAM1,FCGR2B<br>JUN,HRAS,CALM2,MAPK8,NFATC4,RAF1,LOC124827,MAPK14,PRKCB,SHC1,ELK1,PR<br>KCA,CALM1,NFATC3,PPP3CC,SYK,LOC147908,CYCSP35,BTK,BLNK,MAP3K1,MAP2K1<br>,VAV1,CD79A,PPP3CB,CD79B,PPP3CA,PLCG1,GRB2,MAPK3,CALM3,NFATC2,FOS,NF<br>ATC1,LYN,RAC1,SOS1 |
| BIOCARTA_BCR_PATHWAY               | HRAS,F2,CALM2,MAPK8,STAT3,RAF1,LOC124827,STAT4,PRKCB,MAPK14,STAT1,SHC<br>1,PRKCA,STAT2,CALM1,KNG1,GNA11,GNAI1,GNGT1,MYLK,LOC147908,CYCSP35,M<br>AP2K2,CAMK2A,MAPT,CAMK2B,CAMK2D,MAP2K1,CAMK2G,JAK2,CDK5,GNB1,PLC<br>G1,AGT,GRB2,AGTR2,STAT5B,MAPK3,STAT5A,FYN,CALM3,PTK2B,STAT6,SOS1,MAP<br>K1                  |
| BIOCARTA_BIOPEPTIDES_PATHWAY       |                                                                                                                                                                                                                                                                                                                 |
| BIOCARTA_NEUROTRANSMITTERS_PATHWAY | GAD1,TH,HDC,DBH,PNMT,TPH1                                                                                                                                                                                                                                                                                       |
| BIOCARTA_RANKL_PATHWAY             | MAPK8,FOSL2,RELA,IRF9,EIF2AK2,FOSL1,TRAF6,IFNB1,TNFRSF11A,IFNAR1,IFNAR2,<br>NFKB1,FOS,TNFSF11                                                                                                                                                                                                                   |
| BIOCARTA_CACAM_PATHWAY             | CAMK1G,CAMK4,CALM2,CAMK2A,LOC124827,CAMK2B,CAMK2D,CAMK2G,CALM1,<br>CREB1,CALM3,CAMK1,CAMKK1,CAMKK2,LOC147908,CYCSP35                                                                                                                                                                                            |
| BIOCARTA_CDMAC_PATHWAY             | JUN,HRAS,PLCB1,RAF1,PRKCB,PRKCA,RELA,MAP2K1,TNF,CUZD1,MAPK3,NFKB1,FOS<br>,NFKBIA,MYC,MAPK1                                                                                                                                                                                                                      |

|                                                                                                                                                                                                                                                                  |
|------------------------------------------------------------------------------------------------------------------------------------------------------------------------------------------------------------------------------------------------------------------|
| MEF2C,PELP1,PPARGC1A,EP300,ERCC3,ESR1,HDAC3,NROB1,NRIP1,HDAC8,HDAC5,S<br>PEN,HDAC11,SRA1,GRIP1,TBP,CREBBP,HDAC6,GTF2A1,CCND1,HDAC7,NCOR2,HIST<br>2H3C,BRCA1,HDAC9,HDAC4,MED1,CARM1,GTF2F1,GTF2E1,HDAC1,POLR2A,HDAC2<br>,PHB2,HDAC10                              |
| BIOCARTA_CARM_ER_PATHWAY                                                                                                                                                                                                                                         |
| CASP10,CASP9,CASP8,CASP7,BIRC2,APAF1,CASP4,BIRC3,XIAP,CASP6,CASP1,LMNA,<br>CASP3,LMNB1,CASP2,PRF1,DFFA,CYCS,DFFB,GZMB,ARHGDI1B,LMNB2,PARP1<br>CSF1R,SRC,PDGFRA,PRKCB,EGFR,PRKCA,SH3GLB1,CBL,EGF,SH3KBP1,GRB2,MET,SH<br>3GLB2                                     |
| BIOCARTA_CASPASE_PATHWAY                                                                                                                                                                                                                                         |
| NOX1,HRAS,PTK2,PPP1R12B,PLCB1,RAF1,PRKCB,PRKCA,MAP2K1,GNAQ,GNAS,CFL1<br>,CCR3,LIMK1,MYL2,GNGT1,GNB1,RHOA,CCL11,MAPK3,PIK3C2G,ROCK2,MAPK1<br>CD40LG,CD40,IKBKG,CHUK,IKBKAP,MAP3K1,RELA,IKBKB,DUSP1,TRAF6,TRAF3,TNFA<br>IP3,MAP3K14,NFKB1,NFKBIA                   |
| BIOCARTA_CBL_PATHWAY                                                                                                                                                                                                                                             |
| ORC6,MCM4,MCM3,MCM6,CDT1,MCM5,MCM7,CDK2,CDKN1B,MCM2,ORC1,ORC2<br>,ORC4,KITLG,ORC5,CDC6,CCNE1,ORC3                                                                                                                                                                |
| BIOCARTA_CCR3_PATHWAY                                                                                                                                                                                                                                            |
| E2F1,TFDP1,GSK3B,CDKN2A,CDKN1B,CDKN1A,CDK1,TGFB2,CCNA1,CDKN2B,TGFB1,<br>TGFB3,CCND1,CDK2,CDK4,ABL1,RB1,SKP2,TP53,CDK6,DHFR,CDC25A,ATM,ATR,HDA<br>C1,SMAD3,SMAD4,CCNE1                                                                                            |
| BIOCARTA_CD40_PATHWAY                                                                                                                                                                                                                                            |
| YWHAQ,MYT1,CHEK2,EP300,BRCA1,CHEK1,WEE1,MDM2,CDKN1A,TP53,CDK1,CDK<br>N2D,CDC34,CDC25B,CDC25C,GADD45A,CDC25A,PLK1,ATR,ATM,YWHAH,CCNB1,PR<br>KDC,RPS6KA1                                                                                                           |
| BIOCARTA_MCM_PATHWAY                                                                                                                                                                                                                                             |
| CSK,PTK2,SRC,PECAM1,VCL,BCAR1,CTNNA2,CTNNA1,CTNNA3,ACTN1,CTNNA1,PXN,<br>ACTN2,ACTN3                                                                                                                                                                              |
| BIOCARTA_G1_PATHWAY                                                                                                                                                                                                                                              |
| TNF,KNG1,IL1A,ITGAL,ICAM1,VCAM1,SELP,C6,ITGA4,SELPLG,ITGB1,C3,C5,ITGB2,C7,<br>IL6,IL8                                                                                                                                                                            |
| BIOCARTA_G2_PATHWAY                                                                                                                                                                                                                                              |
| CASP8,NSMAF,BCL2,MAPK8,RAF1,MAP3K1,RELA,BAX,MAP2K1,TNFRSF1A,MAP2K4,<br>SMPD1,CYCS,TRAF2,FADD,RIPK1,MAPK3,BAD,NFKB1,TRADD,AIFM1,MAPK1<br>HSPA1A,RELA,TNF,IKBKB,RB1,TNFRSF1B,DNAJA3,IFNGR2,WT1,TP53,TNFRSF1A,JAK<br>2,TAX1BP3,USH1C,LIN7A,IFNG,IFNGR1,NFKB1,NFKBIA |
| BIOCARTA_CELL2CELL_PATHWAY                                                                                                                                                                                                                                       |
| C9,C2,C1S,C6,C3,C5,C1QB,C1QA,C1R,C1QC,C4B,C4A,C8A,C7                                                                                                                                                                                                             |
| BIOCARTA_LAIR_PATHWAY                                                                                                                                                                                                                                            |
| MASP1,C9,C2,C1S,C6,C3,C5,C1QB,CFD,C1QA,C1R,C1QC,MBL2,C4B,C4A,MASP2,C8A<br>,C7,CFB                                                                                                                                                                                |
| BIOCARTA_CERAMIDE_PATHWAY                                                                                                                                                                                                                                        |
| NCOA2,CARM1,NCOA1,NCOR1,KAT2B,EP300,CREBBP,TSC2,HDAC1,RXRA,NCOA3,M<br>ED1                                                                                                                                                                                        |
| BIOCARTA_TID_PATHWAY                                                                                                                                                                                                                                             |
| MEF2C,MEF2D,CALM2,CAMK1G,MEF2BNB-<br>MEF2B,LOC124827,MAPK14,MEF2A,CALM1,IGF1,PPP3CC,HDAC5,IGF1R,INS,LOC14<br>7908,CYCSP35,MYOD1,CABIN1,MAP2K6,AKT1,PPP3CB,PPP3CA,PIK3CA,YWHAH,CAL<br>M3,INSR,CAMK1,NFATC2,MAPK7,NFATC1,PIK3CG,PIK3R1                             |
| BIOCARTA_CLASSIC_PATHWAY                                                                                                                                                                                                                                         |
| CALM2,NOS3,LOC124827,ANXA1,NPPA,RELA,NR3C1,CALM1,CORIN,GNAS,AKT1,AD<br>RB2,PIK3CA,GNGT1,GNB1,HSP90AA1,CALM3,NFKB1,PIK3CG,LOC147908,PIK3R1,CY<br>CSP35                                                                                                            |
| BIOCARTA_COMP_PATHWAY                                                                                                                                                                                                                                            |
| PTEN,CDKN2A,MDM2,CDKN1B,CD79A,TP53,CD79B,MTOR,TGFB2,PIK3CA,TGFB1,RP<br>S6KB1,PPP2CA,SMAD5,TGFB3,SMAD4,TGFB2,TGFB1,PIK3CG,PIK3R1,MYC,SM<br>A1,TFEB                                                                                                                |
| BIOCARTA_VDR_PATHWAY                                                                                                                                                                                                                                             |
| CD3D,CD3E,CD3G,ITGAL,ICAM1,PRF1,FAS,TRB@,TRA@,FASLG,ITGB2,CD247,GZMB,<br>B2M,HLA-A                                                                                                                                                                               |
| BIOCARTA_HDAC_PATHWAY                                                                                                                                                                                                                                            |
| HRAS,PTK2,RAF1,PRKCB,PRKCA,RELA,MAP2K1,BCAR1,GNAQ,CRK,GNAI1,PIK3CA,CX<br>CL12,GNGT1,GNB1,PLCG1,MAPK3,CXCR4,PTK2B,PIK3C2G,NFKB1,PIK3R1,PXN,MAP<br>K1                                                                                                              |
| BIOCARTA_GCR_PATHWAY                                                                                                                                                                                                                                             |
| CCND1,E2F1,TFDP1,CDK2,CDKN2A,CDK4,RB1,CDKN1B,CDKN1A,CDK1,CDKN2D,CCN<br>A1,CDKN2B,CDK6,CDKN2C,CDK7,CDC25A,RBL1,CCND2,CCNB1,CCNE1,CCNH,CCND3<br>EZR,CFTR,SLC9A3R1,PRKAR1A,PRKAR2A,PRKAR2B,PRKAR1B,ADCY1,PRKACB,PRKAC<br>G,GNAS,ADRB2                               |
| BIOCARTA_CTCF_PATHWAY                                                                                                                                                                                                                                            |
| IL12B,LTA,IL13,IL14,IL3,IL12A,IL17A,IL18,TNF,IL16,IL1A,IL15,IFNG,IFNB1,IFNA1,IL4,I<br>L5,IL10,IL9,IL6,IL8,IL2                                                                                                                                                    |
| BIOCARTA_CTL_PATHWAY                                                                                                                                                                                                                                             |
| CSF2,CD4,CSF1,LTA,IL3,TNF,IL15,TGFB2,TGFB1,IFNG,IFNB1,IFNA1,CSF3,TGFB3,IL2,IL<br>8,IL12B,IL13,PDGFA,IL12A,IL7,IL1A,IL4,IL5,IL10,IL6,HLA-DRB1,IL11,HLA-DRA                                                                                                        |
| BIOCARTA_CXCR4_PATHWAY                                                                                                                                                                                                                                           |
| CCND1,E2F1,TFDP1,CDK2,CDKN2A,CDK4,RB1,CDKN1B,CDKN1A,CDK1,CDKN2D,CCN<br>A1,CDKN2B,CDK6,CDKN2C,CDK7,CDC25A,RBL1,CCND2,CCNB1,CCNE1,CCNH,CCND3<br>EZR,CFTR,SLC9A3R1,PRKAR1A,PRKAR2A,PRKAR2B,PRKAR1B,ADCY1,PRKACB,PRKAC<br>G,GNAS,ADRB2                               |
| BIOCARTA_CELLCYCLE_PATHWAY                                                                                                                                                                                                                                       |
| IL12B,LTA,IL13,IL14,IL3,IL12A,IL17A,IL18,TNF,IL16,IL1A,IL15,IFNG,IFNB1,IFNA1,IL4,I<br>L5,IL10,IL9,IL6,IL8,IL2                                                                                                                                                    |
| BIOCARTA_CFTR_PATHWAY                                                                                                                                                                                                                                            |
| CSF2,CD4,CSF1,LTA,IL3,TNF,IL15,TGFB2,TGFB1,IFNG,IFNB1,IFNA1,CSF3,TGFB3,IL2,IL<br>8,IL12B,IL13,PDGFA,IL12A,IL7,IL1A,IL4,IL5,IL10,IL6,HLA-DRB1,IL11,HLA-DRA                                                                                                        |
| BIOCARTA_CYTOKINE_PATHWAY                                                                                                                                                                                                                                        |
| CSF2,CD4,CSF1,LTA,IL3,TNF,IL15,TGFB2,TGFB1,IFNG,IFNB1,IFNA1,CSF3,TGFB3,IL2,IL<br>8,IL12B,IL13,PDGFA,IL12A,IL7,IL1A,IL4,IL5,IL10,IL6,HLA-DRB1,IL11,HLA-DRA                                                                                                        |
| BIOCARTA_INFLAM_PATHWAY                                                                                                                                                                                                                                          |

|                                |                                                                                                                                                                                                                                                                    |
|--------------------------------|--------------------------------------------------------------------------------------------------------------------------------------------------------------------------------------------------------------------------------------------------------------------|
| BIOCARTA_D4GDI_PATHWAY         | CASP10,JUN,CASP9,CASP8,APAF1,ARHGAP5,CASP1,CASP3,PRF1,CYCS,GZMB,ARHG DIB,PARP1                                                                                                                                                                                     |
| BIOCARTA_DC_PATHWAY            | CSF2,IL12B,CD40,IL13,IL3,IL12A,CD2,CD33,TLR9,ANPEP,CD7,CD5,IFNG,ITGAX,IFNB1 ,TLR4,IFNA1,IL4,TLR7,TLR2,IL5,IL10                                                                                                                                                     |
| BIOCARTA_P35ALZHEIMERS_PATHWAY | CDK5,CDK5R1,CAPN1,MAPT,CSNK1D,PPP2CA,CSNK1A1,CAPNS1,GSK3B,CAPNS2,AP P                                                                                                                                                                                              |
| BIOCARTA_RNA_PATHWAY           | CHUK,RELA,MAP3K14,EIF2S2,EIF2S1,NFKB1,DNAJC3,NFKBIA,EIF2AK2,TP53                                                                                                                                                                                                   |
| BIOCARTA_MTA3_PATHWAY          | TUBA4B,TUBA1A,PDZK1,ALDOA,ESR1,SNAI2,MTA3,MBD3,HSPB1,HSPB2,TUBA3C,T UBA4A,GAPDH,MTA1,HDAC1,TUBA1C,CTSD,SNAI1,CDH1                                                                                                                                                  |
| BIOCARTA_SKP2E2F_PATHWAY       | CCNA1,CDC34,E2F1,CUL1,TFDP1,CDK2,RB1,SKP2,CCNE1,SKP1                                                                                                                                                                                                               |
| BIOCARTA_CALCINEURIN_PATHWAY   | CALM2,NFATC4,LOC124827,PRKCB,PRKCA,CALM1,NFATC3,GNAQ,SP1,CDKN1A,PPP 3CB,PPP3CC,PPP3CA,MARCKS,PLCG1,SP3,CALM3,NFATC2,NFATC1,LOC147908,CYC SP35                                                                                                                      |
| BIOCARTA_EGF_PATHWAY           | JUN,CSNK2A1,SRF,HRAS,MAPK8,STAT3,RAF1,PRKCB,STAT4,EGFR,ELK1,PRKCA,SHC1 ,STAT1,STAT2,EGF,MAP2K4,MAP3K1,MAP2K1,JAK1,RASA1,PIK3CA,PLCG1,GRB2,ST AT5B,MAPK3,STAT5A,FOS,STAT6,PIK3R1,SOS1                                                                               |
| BIOCARTA_ETC_PATHWAY           | CYCS,SDHA,SDHD,SDHB,SDHC,SLC25A6,COX1,NDUFA1,ATP5A1,UQCRC1,SLC25A4,G PD2                                                                                                                                                                                           |
| BIOCARTA_NDKDYNAMIN_PATHWAY    | SYNJ2,CALM2,LOC124827,EPS15,CALM1,PPP3CB,DNM1,PPP3CC,BIN1,PPP3CA,AMP H,PICALM,NME1,NME2,AP2A1,CALM3,SYNJ1,LOC147908,CYCSP35,AP2M1,EPN1                                                                                                                             |
| BIOCARTA_EPHA4_PATHWAY         | SELP,ITGB1,ITGA1,RAP1B,ACTA1,EPHA4,FYN,EPHB1,LYN,L1CAM                                                                                                                                                                                                             |
| BIOCARTA_EPO_PATHWAY           | CSNK2A1,JUN,HRAS,EPO,MAPK8,RAF1,ELK1,SHC1,MAP2K1,JAK2,PLCG1,GRB2,STAT 5B,MAPK3,STAT5A,FOS,PTPN6,SOS1,EPOR                                                                                                                                                          |
| BIOCARTA_ECM_PATHWAY           | ROCK1,SRC,HRAS,PTK2,ITGA1,RAF1,SHC1,GSN,ARHGAP5,MAP2K1,PIK3CA,MYL2,IT GB1,DIAPH1,MYLK,RHOA,TLN1,MAPK3,FYN,PIK3CG,PIK3R1,PXN,PFN1,MAPK1                                                                                                                             |
| BIOCARTA_ERK_PATHWAY           | HRAS,STAT3,RAF1,EGFR,ELK1,SHC1,MKNK2,MKNK1,IGF1R,PTPRR,GNGT1,NGF,PPP2 CA,NGFR,SRC,MAP2K2,PDGFRA,RPS6KA5,MAP2K1,GNAS,ITGB1,GNB1,GRB2,MAPK3 ,MYC,SOS1,MAPK1,RPS6KA1                                                                                                  |
| BIOCARTA_ERYTH_PATHWAY         | CSF2,EPO,IL3,FLT3,IGF1,CCL3,IL1A,TGFB2,TGFB1,KITLG,CSF3,IL6,IL9,TGFB3,IL11                                                                                                                                                                                         |
| BIOCARTA_EPONFKB_PATHWAY       | GRIN1,EPO,SOD2,ARNT,RELA,HIF1A,NFKB1,CDKN1A,NFKBIA,JAK2,EPOR                                                                                                                                                                                                       |
| BIOCARTA_EIF_PATHWAY           | EEF2,EIF1,EIF2S3,EIF2S1,EIF3A,EIF1AX,EIF6,EIF4G3,EIF4G2,EIF5,EEF2K,EIF4G1,EIF4A 1,EIF4A2,EIF4E,EIF2S2                                                                                                                                                              |
| BIOCARTA_EXTRINSIC_PATHWAY     | F10,TFPI,F2,F2R,FGG,PROS1,PROC,FGA,SERPINC1,FGB,F3,F5,F7                                                                                                                                                                                                           |
| BIOCARTA_FAS_PATHWAY           | CASP10,JUN,PTPN13,CASP8,CASP7,MAPK8,RIPK2,PAK2,SPTAN1,LMNA,LMNB1,MA P2K4,FADD,CFLAR,LMNB2,MAP3K1,PAK1,RB1,CASP6,MAP3K7,CASP3,DAXX,FAS,DF FA,DFFB,FASLG,ARHGDIB,FAF1,PRKDC,PARP1                                                                                    |
| BIOCARTA_FCER1_PATHWAY         | JUN,HRAS,MAPK8,CALM2,NFATC4,RAF1,LOC124827,PRKCB,SHC1,ELK1,CALM1,NFA TC3,PAK2,PPP3CC,MAP2K4,SYK,FCER1G,FCER1A,LOC147908,CYCSP35,BTK,PLA2G4 A,MAP3K1,MAP2K1,VAV1,MAP2K7,PPP3CB,PPP3CA,PIK3CA,PLCG1,GRB2,MAPK3,C ALM3,NFATC2,FOS,NFATC1,PIK3CG,LYN,PIK3R1,SOS1,MAPK1 |
| BIOCARTA_FEEDER_PATHWAY        | MPI,HK1,KHK,TREH,PGM1,LCT,TPI1,PYGM,PYGL                                                                                                                                                                                                                           |
| BIOCARTA_FIBRINOLYSIS_PATHWAY  | F2,CPB2,F2R,FGB,PLAT,FGG,F13A1,SERPINE1,FGA,SERPINE2,PLAU,PLG                                                                                                                                                                                                      |
| BIOCARTA_FMLP_PATHWAY          | HRAS,PLCB1,CALM2,CAMK1G,FPR1,NFATC4,RAF1,LOC124827,MAPK14,ELK1,RELA, GNA15,CALM1,NFATC3,PPP3CC,GNGT1,PIK3C2G,LOC147908,CYCSP35,MAP2K2,MA P2K3,MAP3K1,NCF2,MAP2K1,NCF1C,PAK1,MAP2K6,PPP3CB,PPP3CA,GNB1,MAPK3, CALM3,CAMK1,NFATC2,NFKB1,NFATC1,RAC1,NFKBIA,MAPK1     |
| BIOCARTA_FREE_PATHWAY          | NOX1,SOD1,GSR,XDH,GSS,GPX1,RELA,TNF,NFKB1,IL8                                                                                                                                                                                                                      |
| BIOCARTA_GABA_PATHWAY          | GPHN,SRC,GABRA5,GABRA6,GABRA3,GABRA4,GABRA2,GABARAP,DNM1                                                                                                                                                                                                           |
| BIOCARTA_GATA3_PATHWAY         | IL13,GATA3,MAPK14,MAP2K3,PRKAR2B,PRKACB,PRKACG,JUNB,PRKAR1A,PRKAR2A ,PRKAR1B,IL4,NFATC2,IL5,NFATC1,MAF                                                                                                                                                             |
| BIOCARTA_GLYCOLYSIS_PATHWAY    | HK1,PGAM1,TPI1,PGK1,GAPDH,PKLR,ALDOB,ENO1,GPI,PFKL                                                                                                                                                                                                                 |
| BIOCARTA_SET_PATHWAY           | PRF1,DFFA,DFFB,HMGB2,NME1,APEX1,GZMB,CREBBP,SET,GZMA,ANP32A                                                                                                                                                                                                        |
| BIOCARTA_GH_PATHWAY            | SRF,HRAS,RAF1,PRKCB,PRKCA,SHC1,SLC2A4,SOCS1,HNF1A,INS,PTPN6,MAP2K1,GH R,JAK2,PIK3CA,GH1,PLCG1,GRB2,MAPK3,IRS1,STAT5B,STAT5A,INSR,PIK3CG,PIK3R1, SOS1,MAPK1,RPS6KA1                                                                                                 |
| BIOCARTA_AHSP_PATHWAY          | ALAS1,ALAS2,HBA1,ALAD,GATA1,CPOX,FECH,UROS,HBA2,AHSP,HMBS,UROD,HBB                                                                                                                                                                                                 |
| BIOCARTA_TCAPOPTOSIS_PATHWAY   | CD4,FAS,CCR5,TRB@,TRA@,FASLG,CD247,CD28,CD3D,CD3E,CD3G                                                                                                                                                                                                             |

|                             |                                                                                                                                                                                                                                                                                                                                                                                                                                         |
|-----------------------------|-----------------------------------------------------------------------------------------------------------------------------------------------------------------------------------------------------------------------------------------------------------------------------------------------------------------------------------------------------------------------------------------------------------------------------------------|
| BIOCARTA_HIVNEF_PATHWAY     | CASP9,CASP8,CASP7,CHUK,TNF,BIRC3,XIAP,PAK2,CDK11B,LMNA,LMNB1,CRADD,FA DD,NUMA1,CFLAR,RIPK1,LMNB2,PRKCD,MAP3K5,PTK2,BID,MAP3K1,MAP2K7,MD M2,CASP6,RB1,TNFRSF1B,CASP3,TNFRSF1A,CASP2,RASA1,DAXX,ACTG1,NFKB1,PRK DC,NFKBIA,BAG4,MAPK8,GSN,RELA,APAF1,PSEN2,PSEN1,SPTAN1,TRAF2,MAP3K14, TRAF1,TRADD,BCL2,BIRC2,FAS,DFFA,CYCS,DFFB,FASLG,ARHGDIB,CDK11A,PARP1 ACTA1,WASL,WASF1,ARPC4,ARPC5,ARPC1A,ACTR2,ACTR3,ARPC1B,ARPC3,ARPC2,R AC1,CDC42 |
| BIOCARTA_SALMONELLA_PATHWAY | HRAS,MYT1,ACTA1,PRKAR2B,CDK1,GNAI1,GNGT1,CAP1,ADCY1,PAQR5,SRC,PIN1,P GR,PRKACB,PRKACG,GNAS,PAQR7,ARPC4,ARPC5,CDC25C,ARPC1A,GNB1,ACTR2,PR KAR1A,ACTR3,PRKAR2A,ARPC1B,PRKAR1B,ARPC3,MAPK3,CCNB1,ARPC2,RPS6KA1, MAPK1                                                                                                                                                                                                                      |
| BIOCARTA_MPR_PATHWAY        | MAP2K2,MAPK14,MAP2K3,MAP3K1,RELA,MAP2K1,RB1,CREB1,MAP2K6,SP1,AKT1, PIK3CA,MAPK3,NFKB1,PIK3CG,PIK3R1,MAPK1                                                                                                                                                                                                                                                                                                                               |
| BIOCARTA_HCMV_PATHWAY       | MAPK8,CSNK1D,ABCB1,CSNK1A1,EP300,HSPA1A,BAX,DNAJB1P1,HIF1A,HIC1,MDM 2,TAF1,CDKN1A,AKT1,TP53,NQO1,FHL2,GADD45A,HSP90AA1,IGFBP3,ATM,RPA1,N FKBIB                                                                                                                                                                                                                                                                                          |
| BIOCARTA_P53HYPOXIA_PATHWAY | JUN,EPO,NOS3,EP300,HIF1A,VHL,CREB1,P4HB,COP5,EDN1,ASPH,VEGFA,ARNT,LD HA,HSP90AA1                                                                                                                                                                                                                                                                                                                                                        |
| BIOCARTA_HIF_PATHWAY        | CSNK2A1,JUN,SRF,HRAS,MAPK8,PTPN11,RAF1,SHC1,ELK1,MAP2K1,IGF1,RASA1,PIK 3CA,IGF1R,GRB2,IRS1,MAPK3,FOS,PIK3CG,PIK3R1,SOS1                                                                                                                                                                                                                                                                                                                 |
| BIOCARTA_IGF1_PATHWAY       | CD4,IL3,IL17A,CD58,CD2,CD3D,CD3E,CD8A,CD3G,CD34,TRB@,KITLG,TRA@,CD247, CSF3,IL6,IL8                                                                                                                                                                                                                                                                                                                                                     |
| BIOCARTA_IL17_PATHWAY       | CSNK2A1,JUN,HRAS,MAPK8,RAF1,SHC1,ELK1,IL2RG,MAP2K1,IL2RB,JAK1,JAK3,SYK, GRB2,STAT5B,MAPK3,STAT5A,FOS,IL2RA,LCK,SOS1,IL2                                                                                                                                                                                                                                                                                                                 |
| BIOCARTA_IL2_PATHWAY        | HRAS,IL3RA,RAF1,IL3,SHC1,MAP2K1,CSF2RB,JAK2,GRB2,MAPK3,STAT5B,STAT5A,FO S,PTPN6,SOS1                                                                                                                                                                                                                                                                                                                                                    |
| BIOCARTA_IL3_PATHWAY        | RPS6KB1,GRB2,SHC1,IL2RG,IRS1,IL4,IL4R,STAT6,JAK1,AKT1,JAK3                                                                                                                                                                                                                                                                                                                                                                              |
| BIOCARTA_IL4_PATHWAY        | CCR3,CD4,CCL11,IL4,IL1B,IL5,IL5RA,IL6,HLA-DRB1,HLA-DRA                                                                                                                                                                                                                                                                                                                                                                                  |
| BIOCARTA_IL5_PATHWAY        | CSNK2A1,JUN,SRF,HRAS,IL6R,STAT3,PTPN11,IL6ST,RAF1,SHC1,ELK1,MAP2K1,TYK2,J AK1,JAK3,JAK2,CEBPB,GRB2,MAPK3,FOS,IL6,SOS1                                                                                                                                                                                                                                                                                                                   |
| BIOCARTA_IL6_PATHWAY        | STAT3,STAT4,STAT1,STAT2,TNF,BLVRA,BLVRB,IL1A,JAK1,HMOX1,STAT5B,STAT5A,S TAT6,IL10,IL10RA,IL6,IL10RB                                                                                                                                                                                                                                                                                                                                     |
| BIOCARTA_IL10_PATHWAY       | JUN,IL12RB1,IL12B,MAPK8,IL12RB2,STAT4,MAPK14,IL12A,IL18,CD3D,CD3E,TYK2,M AP2K6,CD3G,JAK2,CCR5,IFNG,TRB@,TRA@,CD247,IL18R1,CXCR3,ETV5                                                                                                                                                                                                                                                                                                    |
| BIOCARTA_IL12_PATHWAY       | HRAS,E2F1,RAF1,SHC1,IL2RG,IL2RB,CBL,SOCS1,PPIA,SYK,CFLAR,SOCS3,BAD,IL2RA,I KZF3,PTPN6,BCL2,BCL2L1,JAK1,AKT1,JAK3,PIK3CA,FAS,RPS6KB1,CRKL,GRB2,FASLG, NMI,STAT5B,IRS1,MAPK3,STAT5A,FOS,PIK3CG,PIK3R1,MYC,SOS1,MAPK1                                                                                                                                                                                                                      |
| BIOCARTA_IL2RB_PATHWAY      | IL22RA2,STAT3,STAT4,STAT1,STAT2,TYK2,IL22,JAK1,JAK3,JAK2,STAT5B,STAT5A,SOC S3,STAT6,IL10RA,IL22RA1                                                                                                                                                                                                                                                                                                                                      |
| BIOCARTA_IL22BP_PATHWAY     | BCL2,EP300,IL2RG,IL7,JAK1,JAK3,PIK3CA,CREBBP,NMI,STAT5B,STAT5A,FYN,PTK2B,P IK3CG,PIK3R1,LCK,IL7R                                                                                                                                                                                                                                                                                                                                        |
| BIOCARTA_IL7_PATHWAY        | WNT1,TIRAP,RELA,GSK3B,EIF2AK2,CTNNB1,GNAI1,GJA1,MYD88,FZD1,LBP,TOLLIP,P PP2CA,LEF1,IRAK1,CCND1,APC,PDPK1,LY96,DVL1,AKT1,PIK3CA,CD14,TLR4,AXIN1,N FKB1,PIK3R1                                                                                                                                                                                                                                                                            |
| BIOCARTA_GSK3_PATHWAY       | CASP10,CASP9,GAS2,CASP8,CASP7,CHUK,RELA,APAF1,TNFSF12,TNFSF10,BIRC3,XIA P,LMNA,SPTAN1,TNFRSF10A,TRAF2,FADD,CFLAR,TNFRSF10B,RIPK1,MAP3K14,TRA DD,TNFRSF25,BCL2,BID,BIRC2,CASP6,CASP3,CYCS,DFFA,DFFB,NFKB1,NFKBIA                                                                                                                                                                                                                         |
| BIOCARTA_DEATH_PATHWAY      | IKBKG,HRAS,E2F1,CHUK,RAF1,TFDP1,RELA,CDKN1B,CDKN1A,RHOA,CCND1,CDK2,IK BKB,CDK4,PAK1,RB1,AKT1,PIK3CA,CDK6,MAPK3,NFKB1,CCNE1,NFKBIA,PIK3R1,RAC 1,MAPK1                                                                                                                                                                                                                                                                                    |
| BIOCARTA_RACCYCD_PATHWAY    | JUN,HRAS,MAPK8,RAF1,MAP3K1,STAT1,MAP2K1,AKT1,JAK2,PIK3CA,MAP2K4,CRKL, GRB2,STAT5B,MAPK3,STAT5A,BCR,BAD,FOS,PIK3CG,PIK3R1,MYC,SOS1                                                                                                                                                                                                                                                                                                       |
| BIOCARTA_GLEEVEC_PATHWAY    | CSNK2A1,JUN,SRF,HRAS,MAPK8,PTPN11,RAF1,SHC1,ELK1,MAP2K1,SLC2A4,RASA1, PIK3CA,GRB2,IRS1,MAPK3,INS,INSR,FOS,PIK3CG,PIK3R1,SOS1                                                                                                                                                                                                                                                                                                            |
| BIOCARTA_INSULIN_PATHWAY    |                                                                                                                                                                                                                                                                                                                                                                                                                                         |

|                               |                                                                                                                                                                                                                                                                                                                                                                                                                                                                                                                                                                     |
|-------------------------------|---------------------------------------------------------------------------------------------------------------------------------------------------------------------------------------------------------------------------------------------------------------------------------------------------------------------------------------------------------------------------------------------------------------------------------------------------------------------------------------------------------------------------------------------------------------------|
|                               | JUN,HRAS,CAPN1,MAPK8,PPP1R12B,ACTA1,RAF1,SHC1,CAPNS1,VCL,ZYX,TNS1,RHO A,CAPNS2,ACTN1,PXN,ROCK1,CSK,SRC,RAP1A,PTK2,ITGA1,MAP2K2,MAP2K1,BCAR 1,CAV1,RAPGEF1,ITGB1,CRKL,GRB2,TLN1,MAPK3,FYN,BCR,SOS1,ACTN2,ACTN3,MA PK1                                                                                                                                                                                                                                                                                                                                                |
| BIOCARTA_INTEGRIN_PATHWAY     | F10,F9,F8,F2,COL4A1,F2R,COL4A2,COL4A3,COL4A4,KNG1,PROS1,FGG,PROC,KLKB1, FGA,SERPINC1,FGB,F12,COL4A6,SERPING1,F11,COL4A5,F5                                                                                                                                                                                                                                                                                                                                                                                                                                          |
| BIOCARTA_INTRINSIC_PATHWAY    | JUN,HRAS,MAPK8,CHUK,RAF1,PRKCB,MAPK14,PRKCA,EGFR,RELA,TNF,EGF,CEBPA, MAP2K4,TRAF2,PPP2CA,RIPK1,MAP3K14,PRKCG,PRKCH,PRKCD,PRKCE,MAP3K5,HO XA7,BCL2,PRKCQ,MAP2K3,MAP3K1,MAPK13,MAP2K1,MAP2K7,IKBKB,MAP2K6,TNF RSF1B,SP1,TNFRSF1A,DAXX,FAS,FASLG,MAPK3,ETS1,ETS2,FOS,NFKB1,NFKBIA,MAP K1                                                                                                                                                                                                                                                                               |
| BIOCARTA_KERATINOCYTE_PATHWAY | ZAP70,CD4,CD3D,CD3E,CD3G,TRB@,TRA@,CD247,FYN,LCK,HLA-DRB1,PTPRC,HLA- DRA                                                                                                                                                                                                                                                                                                                                                                                                                                                                                            |
| BIOCARTA_TCRA_PATHWAY         | C9,C2,C6,C5,C3,MBL2,C4B,C4A,MASP2,C8A,C7,MASP1                                                                                                                                                                                                                                                                                                                                                                                                                                                                                                                      |
| BIOCARTA_LECTIN_PATHWAY       | JUN,HRAS,MAPK8,CALM2,RAF1,MAPK14,PRKCB,LOC124827,PRKCA,SHC1,CALM1, MAP2K4,LOC147908,CYCSP35,SRC,MAP2K2,MAP2K3,MAP3K1,MAP2K1,GNAQ,BCA R1,PAK1,CRKL,PLCG1,GRB2,MAPK3,CALM3,PTK2B,RAC1,SOS1,MAPK1                                                                                                                                                                                                                                                                                                                                                                      |
| BIOCARTA_PYK2_PATHWAY         | NCOR2,ZBTB16,MAP3K1,MAPK14,EGFR,MAP2K1,THRB,THRA,RARA,RXRA,EGF MEF2C,JUN,MEF2D,MAX,MEF2BNB-                                                                                                                                                                                                                                                                                                                                                                                                                                                                         |
| BIOCARTA_EGFR_SMRTE_PATHWAY   | MEF2B,CHUK,RAF1,MEF2A,STAT1,SHC1,ELK1,PAK2,CEBPA,MKNK1,MAP2K4,RIPK1, ATF2,RAPGEF2,MAPK9,MAP3K5,MAP4K3,MAPK10,MAPK11,MAP2K2,MAP4K4,BRA F,RPS6KA5,MAP2K3,MAP3K1,MAPK13,MAP3K3,MAP2K1,MAP3K4,MAP2K7,MAP3K 10,MAP3K9,IKBKB,MAP2K5,MAP3K11,CREB1,MAP2K6,MAP3K7,MAP3K8,MAP3K12 ,MAP3K6,MAP4K1,MAP4K5,RPS6KA2,RPS6KA3,DAXX,RPS6KB1,RPS6KB2,GRB2,MAP K3,MAPK4,RPS6KA4,MAPK6,NFKB1,MAPK7,RAC1,NFKBIA,MYC,RPS6KA1,MAPK1,M APKAPK3,HRAS,MAP4K2,MAPK8,MAPKAPK5,MAPK14,MAPK12,RELA,MAPKAPK2,T GFB2,MKNK2,TGFB1,TRAF2,ARAF,MAP3K14,TGFB1,TRADD,TGFB3,PAK1,SP1,MAP 3K13,FOS,MAP3K2 |
| BIOCARTA_MAPK_PATHWAY         | CAPN2,HRAS,CAPN1,ACTA1,EGFR,CAPNS1,PRKAR2B,EGF,MYL2,MYLK,CAPNS2,PXN, CXCR3,PTK2,ITGA1,PRKACB,PRKACG,EZR,ITGB1,PRKAR1A,PRKAR2A,PRKAR1B,MAP K3,TLN1,MAPK1                                                                                                                                                                                                                                                                                                                                                                                                             |
| BIOCARTA_MCALPAIN_PATHWAY     | JUN,NR2F1,PPARGC1A,PRKCB,PRKCA,PRKAR2B,TNF,APOA2,APOA1,CD36,FAT1,CRE BBP,INS,NR1H3,ME1,NCOR2,NCOR1,NOS2,HSPA1A,PTGS2,HSD17B4,RXRA,RB1,DUT ,CITED2,CPT1B,MRPL11,STAT5B,MAPK3,STAT5A,NFKBIA,MYC,MAPK1,FRA8B,LPL,FA BP1,EP300,RELA,NRIP1,DUSP1,PPARA,NCOA1,SRA1,HSP90AA1,PDGFA,EHHADH,PR KACB,PRKACG,SP1,MED1,PIK3CA,PRKAR1A,PRKAR2A,PRKAR1B,ACOX1,NROB2,PIK3 CG,PIK3R1                                                                                                                                                                                                |
| BIOCARTA_PPARA_PATHWAY        | JUN,CSF1R,NCOR2,HRAS,CSF1,SIN3A,E2F1,DDX20,E2F4,HDAC5,SIN3B,RBL2,ETS1,H DAC2,RBL1,ETS2,FOS,ETV3                                                                                                                                                                                                                                                                                                                                                                                                                                                                     |
| BIOCARTA_ETS_PATHWAY          | SELL,SELP,ITGA4,ITGB1,ITGB2,PECAM1,SELE,ITGAL,CD44,ITGAM,ICAM1                                                                                                                                                                                                                                                                                                                                                                                                                                                                                                      |
| BIOCARTA_MONOCYTE_PATHWAY     | PTEN,PKD2,TSC2,PDPK1,EIF3A,EIF4G3,AKT1,MTOR,PIK3CA,EIF4G2,MKNK1,RPS6KB1 ,FKBP1A,EIF4G1,TSC1,EIF4A1,PPP2CA,EIF4A2,EIF4B,EIF4E,EIF4EBP1,PIK3R1,RPS6                                                                                                                                                                                                                                                                                                                                                                                                                   |
| BIOCARTA_MTOR_PATHWAY         | HRAS,RAF1,SHC1,PRKAR2B,MAP2K1,PRKACB,PRKACG,AKT1,PIK3CA,IGF1R,GRB2,PR KAR1A,PRKAR2A,PRKAR1B,ADCY1,IRS1,MAPK3,YWHAH,BAD,PIK3R1,SOS1,RPS6KA1 ,MAPK1                                                                                                                                                                                                                                                                                                                                                                                                                   |
| BIOCARTA_IGF1R_PATHWAY        | WNT1,EP300,LDB1,GSK3B,APC,DVL1,CTNNB1,MED1,FZD1,AXIN1,CREBBP,LEF1,HDA C1,PITX2,TRRAP                                                                                                                                                                                                                                                                                                                                                                                                                                                                                |
| BIOCARTA_PITX2_PATHWAY        | CSNK2A1,JUN,HRAS,MAPK8,RAF1,SHC1,ELK1,MAP2K1,PIK3CA,PLCG1,GRB2,NGF,M APK3,NGFR,FOS,PIK3CG,PIK3R1,SOS1                                                                                                                                                                                                                                                                                                                                                                                                                                                               |
| BIOCARTA_NGF_PATHWAY          | EGR2,CALM2,CHUK,LOC124827,RELA,CALM1,PRKAR2B,PPP3CC,CYCSP35,LOC14790 8,MAP3K1,GNAQ,PRKACB,PRKACG,PPP3CB,EGR3,PPP3CA,PLCG1,VIPR2,PRKAR1A,P RKAR2A,VIP,PRKAR1B,CALM3,NFATC2,NFKB1,NFATC1,NFKBIA,MYC                                                                                                                                                                                                                                                                                                                                                                   |
| BIOCARTA_VIP_PATHWAY          |                                                                                                                                                                                                                                                                                                                                                                                                                                                                                                                                                                     |

|                                 |                                                                                                                                                                                                                                                                                                                                                                           |
|---------------------------------|---------------------------------------------------------------------------------------------------------------------------------------------------------------------------------------------------------------------------------------------------------------------------------------------------------------------------------------------------------------------------|
| BIOCARTA_NFAT_PATHWAY           | MEF2C,CAMK1G,CALM2,F2,RAF1,LOC124827,CALM1,PRKAR2B,IGF1,PPP3CC,FGF2, CREBBP,LOC147908,CYCSP35,NKX2-5,CTF1,MAP2K1,AKT1,EDN1,RPS6KB1,MAPK3,CAMK1,MAPK1,HRAS,MAPK8,ACTA1,NFATC4,CSNK1A1,MAPK14,NPPA,NFATC3,GSK3B,GATA4,CALR,CAMK4,HAND1,PRKACB,PRKACG,ELSPBP1,PPP3CB,PPP3CA,PIK3CA,MYH2,FKBP1A,LIF,AGT,PRKAR1A,PRKAR2A,PRKAR1B,HBEGF,CALM3,NFATC2,NFATC1,PIK3CG,HAND2,PIK3R1 |
| BIOCARTA_NTHI_PATHWAY           | MAPK11,CHUK,MAPK14,MAP2K3,EP300,RELA,NR3C1,TNF,IKBKB,MAP2K6,MAP3K7,DUSP1,MYD88,CREBBP,SMAD3,SMAD4,MAP3K14,TGFBR2,IL1B,TLR2,NFKB1,TGFBR1,NFKBIA,IL8                                                                                                                                                                                                                        |
| BIOCARTA_NFKB_PATHWAY           | IKBKG,CHUK,MAP3K1,RELA,TNF,IKBKB,IL1A,MAP3K7,TNFRSF1B,TNFRSF1A,TRAF6,MYD88,FADD,TLR4,RIPK1,TNFAIP3,TAB1,MAP3K14,IL1R1,NFKB1,IRAK1,TRADD,NFKBIA                                                                                                                                                                                                                            |
| BIOCARTA_NOS1_PATHWAY           | GRIN1,GRIN2A,CALM2,GRIN2B,GRIN2C,LOC124827,DLG4,GRIN2D,PRKCB,PRKCA,PRKAR2B,CALM1,NOS1,PRKACB,PRKACG,PPP3CB,PPP3CC,PPP3CA,PRKAR1A,PRKAR2A,PRKAR1B,CALM3,LOC147908,CYCSP35                                                                                                                                                                                                  |
| BIOCARTA_NO2IL12_PATHWAY        | IL12RB1,CD4,IL12B,IL12RB2,STAT4,NOS2,IL12A,CD2,CD3D,CD3E,TYK2,CD3G,JAK2,CCR5,IFNG,CD247,CXCR3                                                                                                                                                                                                                                                                             |
| BIOCARTA_RARRXR_PATHWAY         | NCOR2,KAT2B,ERCC3,RARA,RXRA,HDAC3,NCOA3,NCOA2,NCOA1,GTF2F1,TBP,GTF2E1,GTF2A1,POLR2A,GTF2B                                                                                                                                                                                                                                                                                 |
| BIOCARTA_NUCLEARRS_PATHWAY      | CYP2E1,ABCB4,ABCB1,RARA,PPARG,PPARD,PPARA,ABCB11,NR0B2,NR1I3,ABCC3,NR1H4,CYP1A2,NR1H3,IDD1                                                                                                                                                                                                                                                                                |
| BIOCARTA_ARENF2_PATHWAY         | JUN,MAPK8,MAPK14,PRKCB,PRKCA,MAFK,FXD2,KEAP1,CREB1,MAFG,MAFF,FOS,MAPK1                                                                                                                                                                                                                                                                                                    |
| BIOCARTA_P38MAPK_PATHWAY        | MEF2C,MAX,MEF2D,HRAS,MEF2BNB-MEF2B,MAPK14,MAPKAPK5,MEF2A,STAT1,SHC1,ELK1,MAPKAPK2,HSPB1,HSPB2,TGFB2,MAP2K4,MKNK1,TGFB1,TRAF2,RIPK1,DDIT3,ATF2,TGFBR1,TRADD,RAPGEF2,HMGN1,TGFB3,MAP3K5,RPS6KA5,PLA2G4A,MAP3K1,MAP3K9,CREB1,MAP2K6,MAP3K7,DAXX,GRB2,RAC1,MYC,CDC42                                                                                                          |
| BIOCARTA_P53_PATHWAY            | CCND1,BCL2,E2F1,APAF1,BAX,CDK2,CDK4,MDM2,RB1,CDKN1A,TP53,GADD45A,ATM,TIMP3,PCNA,CCNE1                                                                                                                                                                                                                                                                                     |
| BIOCARTA_PDGF_PATHWAY           | JUN,CSNK2A1,SRF,HRAS,MAPK8,STAT3,RAF1,PRKCB,STAT4,ELK1,PRKCA,SHC1,STAT1,STAT2,MAP2K4,PDGFA,MAP3K1,PDGFRA,MAP2K1,JAK1,RASA1,PIK3CA,PLCG1,GRB2,STAT5B,MAPK3,STAT5A,FOS,STAT6,PIK3CG,PIK3R1,SOS1                                                                                                                                                                             |
| BIOCARTA_CCR5_PATHWAY           | JUN,CALM2,MAPK8,LOC124827,PRKCB,MAPK14,PRKCA,CALM1,GNAQ,CCL2,CXCL12,CCL4,CCR5,PLCG1,CALM3,CXCR4,PTK2B,FOS,LOC147908,CYCSP35                                                                                                                                                                                                                                               |
| BIOCARTA_PTDINS_PATHWAY         | BTK,GSK3B,PDPK1,GSK3A,AKT1,PFKM,PFKL,RPS6KB1,ARHGFE2,VAV2,PRKCZ,JAG1,PLCG1,ARF1,AP2A1,BAD,EEA1,RAB5A,PFKP,LYN,RAC1,AP2M1,PRKCE                                                                                                                                                                                                                                            |
| BIOCARTA_PLCE_PATHWAY           | PLCE1,PRKAR1A,PTGER1,PRKAR2A,PRKAR2B,PRKAR1B,ADCY1,PRKACB,PRKACG,RAIP2B,GNAS,ADRB2                                                                                                                                                                                                                                                                                        |
| BIOCARTA_EDG1_PATHWAY           | PLCB1,PRKCB,PRKCA,SPHKAP,GNAI1,GNGT1,RHOA,ADCY1,SPHK1,SRC,PTK2,PDGFA,PDGFRA,SMPD2,S1PR1,ITGB3,AKT1,PIK3CA,ASAH1,ITGAV,SMPD1,GNB1,MAPK3,PIK3CG,PIK3R1,RAC1,MAPK1                                                                                                                                                                                                           |
| BIOCARTA_CDK5_PATHWAY           | CDK5,HRAS,CDK5R1,MAP2K2,EGR1,RAF1,NGF,MAP2K1,MAPK3,NGFR,MAPK1                                                                                                                                                                                                                                                                                                             |
| BIOCARTA_MYOSIN_PATHWAY         | PLCB1,PPP1R12B,PRKCB,PRKCA,ARHGFE6,ARHGFE4,GNA12,ARHGFE17,GNA13,ARHGFE11,ARHGFE3,ARHGFE18,MYL2,ARHGFE15,GNGT1,ARHGFE16,MYLK,PKN1,ROCK1,ARHGFE10,MYL7,ARHGFE7,ARHGAP5,ARHGFE12,GNAQ,ARHGFE9,ARHGFE2,GNB1,ARHGFE1,ARHGFE5,ARHGFE19                                                                                                                                          |
| BIOCARTA_PLATELETAPP_PATHWAY    | F9,F2,COL4A1,COL4A2,COL4A3,COL4A4,SERPINE1,APP,PLG,PLAT,COL4A6,F11,COL4A5,PLAU                                                                                                                                                                                                                                                                                            |
| BIOCARTA_PS1_PATHWAY            | WNT1,NOTCH1,GSK3B,APC,BTRC,PSEN1,DVL1,CTNNB1,HNF1A,DLL1,FZD1,ADAM17,RBPJ,AXIN1                                                                                                                                                                                                                                                                                            |
| BIOCARTA_PROTEASOME_PATHWAY     | PSMD14,RPN1,PSMC3,PSMD12,PSMA1,PSMD6,PSMA5,RPN2,PSMA4,PSMA3,PSMA2,PSMC2,PSMB3,UBA1,PSMB2,PSMB5,PSMB4,PSMD11,PSMB7,PSMB6,UBE2A,UBE3A,PSMA6,PSMA7,PSMB1,PSMD8,PSMC4,PSMC6                                                                                                                                                                                                   |
| BIOCARTA_AKAPCENTROSOME_PATHWAY | PCNT,PRKAR2B,PRKACB,PRKACG,NUP85,CDK1,PRKAG1,RHOA,PPP2CA,PRKAR2A,PPP1CA,MAP2,PKN1,AKAP9,PRKCE                                                                                                                                                                                                                                                                             |

|                             |                                                                                                                                                                                                                                                                                                       |
|-----------------------------|-------------------------------------------------------------------------------------------------------------------------------------------------------------------------------------------------------------------------------------------------------------------------------------------------------|
| BIOCARTA_PTEN_PATHWAY       | PTK2,PTEN,PKD2,SHC1,FOXO3,PDPK1,BCAR1,CDKN1B,ILK,AKT1,PIK3CA,ITGB1,FASLG,GRB2,MAPK3,PIK3R1,SOS1,MAPK1                                                                                                                                                                                                 |
| BIOCARTA_RAB_PATHWAY        | RAB27A,RAB8A,RAB9A,RAB2A,RAB6A,RAB1A,ACTA1,RAB4A,RAB5A,RAB7A,RAB3A,RAB11A                                                                                                                                                                                                                             |
| BIOCARTA_RAC1_PATHWAY       | CDK5R1,PPP1R12B,PDGFRA,MAP3K1,NCF2,ARFIP2,VAV1,WASF1,PAK1,RALBP1,CHN1,CFL1,PIK3CA,CDK5,LIMK1,MYL2,RPS6KB1,MYLK,PLD1,PIK3CG,TRIO,RAC1,PIK3R1                                                                                                                                                           |
| BIOCARTA_RAS_PATHWAY        | CASP9,HRAS,FOXO4,CHUK,RALA,RAF1,BCL2L1,ELK1,RELA,MAP2K1,RALBP1,RALGDS,AKT1,PIK3CA,RHOA,PLD1,MAPK3,BAD,NFKB1,PIK3CG,RAC1,PIK3R1,CDC42                                                                                                                                                                  |
| BIOCARTA_NKCELLS_PATHWAY    | KLRC3,KLRD1,KLRC1,IL18,KLRC2,MAP2K1,VAV1,PAK1,LAT,PIK3CA,KLRC4,ITGB1,SYK,MAPK3,PTK2B,B2M,PTPN6,RAC1,PIK3R1,HLA-A                                                                                                                                                                                      |
| BIOCARTA_RB_PATHWAY         | MYT1,MAPK14,CHEK1,CDK2,CDK4,WEE1,RB1,TP53,CDK1,CDC25B,CDC25C,ATM,YWHAH                                                                                                                                                                                                                                |
| BIOCARTA_CHREBP2_PATHWAY    | YWHAQ,GCK,PRKAR2B,PPP2R2D,PPP2R2A,PPP2R2B,MLX,MLXIPL,FASN,PRKAB2,PPP2CB,PRKAB1,PPP2CA,PRKAA2,PPP2R1A,PRKAA1,PPP2R1B,PRKAG2,YWHAB,PRKACA,PRKACB,PRKACG,PRKAG3,PPP2R5A,PPP2R4,PPP2R3A,PPP2R2C,PRKAG1,PPP2R5E,PPP2R5D,PRKAR1A,PPP2R5C,PRKAR2A,PPP2R5B,ACACA,PRKAR1B,PPP2R3B,YWHAZ,YWHAH,PKLR,YWHAG,YWHAE |
| BIOCARTA_BAD_PATHWAY        | IL3RA,IL3,PRKAR2B,IGF1,CSF2RB,IGF1R,KITLG,ADCY1,BAD,BCL2,BCL2L1,BAX,KIT,PRKACB,PRKACG,AKT1,PIK3CA,PRKAR1A,PRKAR2A,PRKAR1B,MAPK3,YWHAH,PIK3CG,PIK3R1,MAPK1,RPS6KA1                                                                                                                                     |
| BIOCARTA_CK1_PATHWAY        | CDK5R1,PLCB1,CSNK1D,PRKAR2B,PRKACB,PRKACG,GRM1,PPP3CA,CDK5,PPP2CA,PRKAR1A,PRKAR2A,PPP1CA,PRKAR1B,DRD1,DRD2,PPP1R1B                                                                                                                                                                                    |
| BIOCARTA_EIF2_PATHWAY       | EIF5,EIF2AK1,PPP1CA,EIF2S3,GSK3B,EIF2S2,EIF2S1,EIF2B5,EIF2AK2,EIF2AK3,EIF2AK4                                                                                                                                                                                                                         |
| BIOCARTA_EIF4_PATHWAY       | PTEN,PKD2,PRKCB,MAPK14,PRKCA,PDPK1,GHR,EIF4G3,AKT1,MTOR,PIK3CA,EIF4G2,MKNK1,RPS6KB1,EIF4G1,EIF4A1,EIF4A2,MAPK3,EIF4E,IRS1,EIF4EBP1,PIK3R1,PABPC1,MAPK1                                                                                                                                                |
| BIOCARTA_STEM_PATHWAY       | CSF2,CD4,CSF1,EPO,IL3,IL7,CD8A,CSF3,IL4,IL5,IL9,IL6,IL8,IL11,IL2                                                                                                                                                                                                                                      |
| BIOCARTA_P27_PATHWAY        | E2F1,TFDP1,NEDD8,CDK2,CDKN1B,RB1,SKP2,SKP1,CUL1,RBX1,UBE2M,CKS1B,CCNE1                                                                                                                                                                                                                                |
| BIOCARTA_PGC1A_PATHWAY      | MEF2C,MEF2D,CALM2,CAMK1G,MEF2BNB-MEF2B,MEF2A,PPARGC1A,LOC124827,CALM1,SLC2A4,PPP3CC,HDAC5,PPARA,ESRRA,CYCSP35,LOC147908,CAMK4,CAMK2A,CAMK2B,CAMK2D,CAMK2G,PPP3CB,PPP3CA,YWHAH,CALM3,CAMK1                                                                                                             |
| BIOCARTA_PML_PATHWAY        | HRAS,PAX3,PRAM1,TNF,RARA,PML,RB1,TNFRSF1B,TP53,TNFRSF1A,DAXX,FAS,FASLG,CREBBP,SUMO1,SP100,SIRT1                                                                                                                                                                                                       |
| BIOCARTA_DREAM_PATHWAY      | JUN,PRKAR2B,PRKACB,PRKACG,CREB1,CREM,OPRK1,PRKAR1A,PRKAR2A,PRKAR1B,MAPK3,POLR2A,FOS,KCNIP3                                                                                                                                                                                                            |
| BIOCARTA_LEPTIN_PATHWAY     | LEPR,PRKAG1,PRKAB2,CPT1A,PRKAB1,PRKAA2,LEP,PRKAA1,ACACA,PRKAG3,PRKAG2                                                                                                                                                                                                                                 |
| BIOCARTA_RHO_PATHWAY        | PPP1R12B,GSN,VCL,ARHGEF11,CFL1,LIMK1,MYL2,DIAPH1,MYLK,RHOA,OPHN1,ROCK1,SRC,ARHGAP4,ARHGAP1,ARHGAP6,ARHGAP5,PIP5K1A,PIP5K1B,ARPC4,ARPC5,ARPC1A,BAIAP2,ACTR2,ACTR3,ARHGEF1,ARPC1B,ARHGEF5,ARPC3,TLN1,ARPC2,PFN1,PRKAG1,LPAR2,RHOA,PRKAR2A,PRKAR2B,AKAP13,GNA12,PRKACB,GNA13,PRKACG,LPAR1,LPAR3          |
| BIOCARTA_AKAP13_PATHWAY     | CHEK2,TREX1,BRCA2,MRE11A,RAD17,NBN,BRCA1,RAD9A,FANCE,CHEK1,FANCG,TP53,HUS1,RAD1,ATR,ATM,RAD51,FANCF,RAD50,FANCC,FANCD2                                                                                                                                                                                |
| BIOCARTA_ATRBRCA_PATHWAY    | JUN,EDNRRB,HRAS,PRKCB,EGFR,PRKCA,RELA,ADAM12,EGF,EDN1,EDNRA,AGT,PLCG1,RHOA,AGTR1,FOS,NFKB1,MYC                                                                                                                                                                                                        |
| BIOCARTA_CARDIACEGF_PATHWAY | ERBB4,HRAS,IL6R,ERBB3,STAT3,IL6ST,RAF1,SHC1,EP300,EGFR,MAP2K1,ESR1,PIK3CA,CARM1,GRIP1,GRB2,MAPK3,PIK3CG,PIK3R1,IL6,SOS1,MAPK1                                                                                                                                                                         |
| BIOCARTA_HER2_PATHWAY       | MEF2C,MEF2D,HRAS,MEF2BNB-MEF2B,MEF2A,SHC1,CREB1,AKT1,PIK3CA,PLCG1,GRB2,MAPK3,MAPK7,PIK3CG,NTRK1,PIK3R1,RPS6KA1,MAPK1                                                                                                                                                                                  |
| BIOCARTA_ERK5_PATHWAY       |                                                                                                                                                                                                                                                                                                       |

|                                |                                                                                                                                                                                                                                                                                                       |
|--------------------------------|-------------------------------------------------------------------------------------------------------------------------------------------------------------------------------------------------------------------------------------------------------------------------------------------------------|
| BIOCARTA_MAL_PATHWAY           | ROCK1,SRF,HRAS,MAP4K2,MAPK8,ACTA1,MAP2K2,RAF1,MAP3K1,MAP2K1,MAL,HNF1A,LIMK1,DIAPH1,RHOA,MAPK3,RAC1,CDC42,MAPK1                                                                                                                                                                                        |
| BIOCARTA_MEF2D_PATHWAY         | CAPN2,MEF2D,CABIN1,CALM2,LOC124827,PRKCB,PRKCA,CAPNS1,EP300,CALM1,PPP3CB,PPP3CC,PPP3CA,TRB@,TRA@,HDAC1,CALM3,HDAC2,NFATC2,NFATC1,CAPNS2,LOC147908,CYCSP35                                                                                                                                             |
| BIOCARTA_MITOCHONDRIA_PATHWAY  | CASP9,CASP8,CASP7,BCL2,BID,BIK,BCL2L1,BIRC2,APAF1,BAX,BIRC3,XIAP,CASP6,CASP3,DFFA,DIABLO,CYCS,DFFB,ENDOG,BAK1,AIFM1                                                                                                                                                                                   |
| BIOCARTA_ACH_PATHWAY           | SRC,PTK2,TERT,CHRNA3,FOXO3,RAPSN,AKT1,PIK3CA,MUSK,FASLG,CHRNA1,YWHAH,BAD,PTK2B,PIK3CG,PIK3R1                                                                                                                                                                                                          |
| BIOCARTA_PARKIN_PATHWAY        | LOC93486,SNCA,SEPT5,SNCAIP,UBE2G2,UBE2G1,UBE2L6,PARK2,GPR37,UBE2L3,UBE2E2,SUMO1,UBE2F                                                                                                                                                                                                                 |
| BIOCARTA_CDC42RAC_PATHWAY      | WASL,PDGFRA,PAK1,ARPC4,PIK3CA,ARPC5,ARPC1A,ACTR2,RHOA,ACTR3,ARPC1B,ARPC3,ARPC2,RAC1,PIK3R1,CDC42                                                                                                                                                                                                      |
| BIOCARTA_RANMS_PATHWAY         | RANGAP1,KIF15,NUMA1,KPNB1,KPNA2,RCC1,TPX2,RAN,RANBP1,AURKA                                                                                                                                                                                                                                            |
| BIOCARTA_BARR_MAPK_PATHWAY     | ARRB1,GNGT1,PLCB1,GNB1,MAP2K2,RAF1,MAP2K1,ADCY1,MAPK3,GNAS,DNM1,MAPK1                                                                                                                                                                                                                                 |
| BIOCARTA_TOB1_PATHWAY          | TOB1,CD28,CD3D,CD3E,CD3G,TGFB2,TGFB1,TOB2,IFNG,TRB@,TRA@,CD247,SMAD3,TGFB3,IL4,SMAD4,TGFB2,TGFB1,IL2RA,TGFB3,IL2                                                                                                                                                                                      |
| BIOCARTA_BARRESTIN_SRC_PATHWAY | SRC,HRAS,PLCB1,MAP2K2,RAF1,MAP2K1,GNAS,DNM1,ARRB1,GNGT1,GNB1,ADCY1,MAPK3,HCK,MAPK1                                                                                                                                                                                                                    |
| BIOCARTA_NKT_PATHWAY           | CSF2,CD4,CD28,CCR2,CCR1,CCL3,IFNGR2,TGFB2,TGFB1,CCL4,IFNG,IFNGR1,CXCR4,TGFB3,CXCR3,IL2,CD40LG,IL12RB1,IL12B,IL12RB2,IL12A,CCR3,CCR4,CCR5,CCR7,IL4,IL4R,IL5,IL18R1                                                                                                                                     |
| BIOCARTA_IL1R_PATHWAY          | JUN,MAPK8,CHUK,MAPK14,RELA,TNF,TGFB2,TRAF6,MYD88,TGFB1,TOLLIP,IFNB1,IFNA1,ECSIT,IL1RAP,MAP3K14,IRAK2,IL1B,IL1R1,IRAK1,IL1RN,TGFB3,MAP2K3,MAP3K1,IRAK3,IKKBK,IL1A,MAP2K6,MAP3K7,TAB1,NFKB1,NFKBIA,IL6                                                                                                  |
| BIOCARTA_MET_PATHWAY           | JUN,HRAS,MAPK8,STAT3,ACTA1,PTPN11,RAF1,ELK1,HGF,MET,PXN,SRC,RAP1A,PTEN,PTK2,ITGA1,RAP1B,MAP2K2,MAP2K1,PAK1,DOCK1,MAP4K1,RASA1,CRK,PIK3CA,RAPGEF1,ITGB1,CRKL,GAB1,GRB2,MAPK3,PTK2B,FOS,PIK3CG,PIK3R1,SOS1,MAPK1                                                                                        |
| BIOCARTA_GPCR_PATHWAY          | JUN,HRAS,CALM2,NFATC4,RAF1,LOC124827,PRKCB,ELK1,PRKCA,PRKAR2B,CALM1,NFATC3,PPP3CC,GNAI1,GNGT1,ADCY1,LOC147908,CYCSP35,MAP2K1,GNAQ,PRKACB,PRKACG,GNAS,CREB1,PPP3CB,PPP3CA,RPS6KA3,GNB1,PLCG1,PRKAR1A,PRKAR2A,PRKAR1B,MAPK3,CALM3,NFATC2,FOS,NFATC1                                                     |
| BIOCARTA_IGF1MTOR_PATHWAY      | PTEN,PKD2,EIF2S3,GSK3B,PDPK1,EIF2S1,IGF1,AKT1,MTOR,PIK3CA,IGF1R,RPS6KB1,PPP2CA,EIF4E,EIF4EBP1,EIF2S2,EIF2B5,INPPL1,PIK3R1,RPS6                                                                                                                                                                        |
| BIOCARTA_SODD_PATHWAY          | BAG4,CASP8,TRAF2,FADD,RIPK1,TNF,BIRC3,TNFRSF1B,TRADD,TNFRSF1A                                                                                                                                                                                                                                         |
| BIOCARTA_SHH_PATHWAY           | DYRK1A,SHH,GLI1,PRKAR2B,GSK3B,SUFU,PRKACB,PRKACG,GLI2,GLI3,PTCH1,SMO,PRKAR1A,PRKAR2A,PRKAR1B,DYRK1B                                                                                                                                                                                                   |
| BIOCARTA_PTC1_PATHWAY          | MNAT1,CDC25B,SHH,CDK7,CDC25C,XPO1,CDC25A,CCNB1,PTCH1,CCNH,CDK1                                                                                                                                                                                                                                        |
| BIOCARTA_SPRY_PATHWAY          | SRC,HRAS,SPRY2,RAF1,SPRY1,EGFR,SHC1,MAP2K1,CBL,SPRY4,EGF,RASA1,GRB2,MAPK3,SPRY3,PTPRB,SOS1,MAPK1                                                                                                                                                                                                      |
| BIOCARTA_BARRESTIN_PATHWAY     | PPARA,ARRB1,GNGT1,PLCB1,GNB1,ADCY1,AP2A1,GNAS,DNM1,AP2M1                                                                                                                                                                                                                                              |
| BIOCARTA_STATHMIN_PATHWAY      | CAMK4,CAMK2A,CAMK2B,CAMK2D,MAPK13,PRKAR2B,CAMK2G,CD2,PRKACB,CD3D,PRKACG,CD3E,CD3G,CDK1,PRKAR1A,PRKAR2A,CD247,PRKAR1B,CCNB1                                                                                                                                                                            |
| BIOCARTA_HSP27_PATHWAY         | MAPKAPK3,CASP9,BCL2,ACTA1,APAF1,TNF,MAPKAPK2,IL1A,CASP3,HSPB1,HSPB2,DAXX,CYCS,FAS,FASLG                                                                                                                                                                                                               |
| BIOCARTA_TCR_PATHWAY           | JUN,ZAP70,CALM2,PRKCB,LOC124827,RAF1,ELK1,PRKCA,SHC1,CALM1,PPP3CC,MAP2K4,CYCSP35,PTPN7,LOC147908,MAP3K1,MAP2K1,VAV1,RASA1,GRB2,MAPK3,NFKB1,NFKBIA,RAC1,SOS1,HRAS,MAPK8,NFATC4,NFATC3,RELA,LAT,CD247,CD3D,CD3E,CD3G,PPP3CB,PPP3CA,PIK3CA,TRB@,PLCG1,TRA@,CALM3,FYN,NFATC2,NFATC1,FOS,PIK3CG,LCK,PIK3R1 |
| BIOCARTA_TCYTOTOXIC_PATHWAY    | CD28,CD2,CD3D,CD3E,CD8A,CD3G,ITGAL,ICAM1,THY1,TRB@,ITGB2,TRA@,CD247,PTPRC                                                                                                                                                                                                                             |
| BIOCARTA_THELPER_PATHWAY       | CD4,CD28,CD2,CD3D,CD3E,CD3G,ITGAL,ICAM1,THY1,TRB@,ITGB2,TRA@,CD247,PTPRC                                                                                                                                                                                                                              |
| BIOCARTA_TALL1_PATHWAY         | TNFRSF13C,MAPK8,CHUK,MAPK14,RELA,TNFSF13,TNFSF13B,TNFRSF13B,TRAF6,TRAF5,TRAF3,TRAF2,TNFRSF17,MAP3K14,NFKB1                                                                                                                                                                                            |



|                            |                                                                                                                                                                                                                                                                                                                      |
|----------------------------|----------------------------------------------------------------------------------------------------------------------------------------------------------------------------------------------------------------------------------------------------------------------------------------------------------------------|
| BIOCARTA_TEL_PATHWAY       | BCL2, TERT, TERF1, EGFR, PRKCA, TEP1, KRAS, RB1, AKT1, TP53, IGF1R, TNKS, HSP90AA1, P<br>PP2CA, XRCC5, POLR2A, XRCC6, MYC                                                                                                                                                                                            |
| BIOCARTA_TGFB_PATHWAY      | EP300, MAP2K1, APC, MAP3K7, ZFYVE9, TGFB2, TGFB1, CREBBP, MAPK3, TAB1, SMAD3, S<br>MAD4, TGFB2, SKIL, TGFB1, SMAD7, TGFB3, CDH1, SMAD2                                                                                                                                                                               |
| BIOCARTA_TH1TH2_PATHWAY    | CD40LG, IL12RB1, CD40, IL12B, IL12RB2, CD86, IL12A, CD28, IL18, IFNGR2, IFNG, IFNGR1, I<br>L4, IL4R, IL2RA, HLA-DRB1, HLA-DRA, IL2, IL18R1                                                                                                                                                                           |
| BIOCARTA_41BB_PATHWAY      | JUN, MAP3K5, MAPK8, CHUK, MAPK14, MAP3K1, RELA, TNFRSF9, IKBKB, MAP4K5, IFNG,<br>TRAF2, ATF2, IL4, NFKB1, NFKBIA, IL2                                                                                                                                                                                                |
| BIOCARTA_KREB_PATHWAY      | FH, SDHA, OGDH, SUCLA2, CS, ACO2, IDH2, MDH1                                                                                                                                                                                                                                                                         |
| BIOCARTA_CTLA4_PATHWAY     | PTPN11, CD80, CD86, CD28, CD3D, CD3E, CD3G, ITK, PIK3CA, ICOSLG, TRB@, TRA@, GRB2<br>, CD247, ICOS, PIK3R1, LCK, HLA-DRB1, HLA-DRA, CTLA4, IL2                                                                                                                                                                       |
| BIOCARTA_LONGEVITY_PATHWAY | HRAS, SOD1, SOD2, SOD3, FOXO3, SHC1, GHR, IGF1, CAT, AKT1, PIK3CA, IGF1R, GH1, PIK3C<br>G, PIK3R1                                                                                                                                                                                                                    |
| BIOCARTA_SARS_PATHWAY      | LDHC, CKM, FBL, LDHA, GPT, MAPK14, EIF4E, NCL, ANPEP, LDHB                                                                                                                                                                                                                                                           |
| BIOCARTA_PAR1_PATHWAY      | F2, PLCB1, PPP1R12B, F2R, PRKCB, PRKCA, ARHGEF6, ARHGEF4, ARHGEF17, GNA12, GNA<br>13, ARHGEF11, ARHGEF3, GNAI1, ARHGEF18, ARHGEF15, GNGT1, ARHGEF16, RHOA, AD<br>CY1, F2RL3, ROCK1, ARHGEF10, ARHGEF7, ARHGEF12, GNAQ, MAP3K7, ARHGEF9, PIK3C<br>A, ARHGEF2, GNB1, ARHGEF1, ARHGEF5, ARHGEF19, PTK2B, PIK3CG, PIK3R1 |
| BIOCARTA_STRESS_PATHWAY    | JUN, LTA, IKBKG, MAP4K2, MAPK8, CHUK, MAPK14, RELA, TNF, MAP2K4, CRADD, TRAF2, T<br>ANK, RIPK1, MAP3K14, TRADD, MAP2K3, MAP3K1, IKBKB, MAP2K6, CASP2, TNFRSF1A, A<br>TF1, NFKB1, NFKBIA                                                                                                                              |
| BIOCARTA_TNFR1_PATHWAY     | JUN, BAG4, CASP8, MAPK8, TNF, PAK2, LMNA, SPTAN1, LMNB1, CRADD, MAP2K4, TRAF2,<br>FADD, RIPK1, TRADD, LMNB2, MADD, MAP3K1, PAK1, MAP3K7, RB1, CASP3, TNFRSF1A, C<br>ASP2, DFFA, DFFB, ARHGDIB, PRKDC, PARP1                                                                                                          |
| BIOCARTA_TNFR2_PATHWAY     | IKBKG, LTA, CHUK, IKBKAP, MAP3K1, RELA, IKBKB, TNFRSF1B, DUSP1, TRAF3, TRAF2, TAN<br>K, RIPK1, TNFAIP3, MAP3K14, NFKB1, TRAF1, NFKBIA                                                                                                                                                                                |
| BIOCARTA_TOLL_PATHWAY      | JUN, IKBKG, TLR10, MAPK8, TIRAP, CHUK, MAPK14, ELK1, RELA, TLR9, EIF2AK2, TRAF6, PP<br>ARA, MAP2K4, MYD88, TOLLIP, ECSIT, TAB2, PGLYRP1, MAP3K14, IRAK1, TLR6, MAP2K3,<br>MAP3K1, LY96, IKBKB, MAP2K6, MAP3K7, CD14, TLR3, TLR4, TAB1, TLR7, FOS, TLR2, NFKB<br>1, NFKBIA                                            |
| BIOCARTA_TPO_PATHWAY       | CSNK2A1, JUN, HRAS, STAT3, RAF1, PRKCB, STAT1, SHC1, PRKCA, MAP2K1, MPL, RASA1, J<br>AK2, PIK3CA, PLCG1, GRB2, STAT5B, MAPK3, STAT5A, THPO, FOS, PIK3CG, PIK3R1, SOS1                                                                                                                                                |
| BIOCARTA_CREB_PATHWAY      | HRAS, MAPK14, PRKCB, PRKCA, PRKAR2B, ADCY1, CAMK2A, CAMK2B, RPS6KA5, CAMK2<br>D, CAMK2G, PRKACB, PRKACG, GNAS, CREB1, AKT1, PIK3CA, GRB2, PRKAR1A, PRKAR2A, P<br>RKAR1B, MAPK3, PIK3R1, RAC1, SOS1, MAPK1, RPS6KA1                                                                                                   |
| BIOCARTA_CARM1_PATHWAY     | EP300, PRKAR2B, PRKACB, RARA, PRKACG, CREB1, RXRA, NCOA3, CARM1, PRKAR1A, CRE<br>BBP, PRKAR2A, PRKAR1B                                                                                                                                                                                                               |
| BIOCARTA_TFF_PATHWAY       | CASP9, HRAS, PTK2, SHC1, EGFR, ARAF1, GHR, AKT1, CTNNB1, PIK3CA, CYCS, ITGB1, GH1, R<br>HOA, GRB2, MAPK3, BAD, PIK3CG, PIK3R1, SOS1, MAPK1                                                                                                                                                                           |
| BIOCARTA_TRKA_PATHWAY      | PIK3CA, HRAS, PLCG1, PRKCB, NGF, GRB2, SHC1, PRKCA, AKT1, PIK3R1, NTRK1, SOS1                                                                                                                                                                                                                                        |
| BIOCARTA_ARF_PATHWAY       | TWIST1, E2F1, POLR1C, CDKN2A, MDM2, ABL1, RB1, TP53, POLR1D, PIK3CA, TBX2, POLR1<br>A, POLR1B, PIK3CG, PIK3R1, RAC1, MYC                                                                                                                                                                                             |
| BIOCARTA_UCALPAIN_PATHWAY  | SRC, PTK2, CAPN1, ITGA1, ACTA1, CAPNS1, ITGB3, SPTAN1, EZR, ITGB1, RHOA, TLN1, CAP<br>NS2, RAC1, ACTN1, PXN, ACTN2, ACTN3                                                                                                                                                                                            |
| BIOCARTA_VEGF_PATHWAY      | HRAS, PRKCB, SHC1, EIF1, PRKCA, VEGFA, EIF2B4, ELAVL1, EIF2B2, EIF2B3, EIF2S2, EIF2B5,<br>PXN, PTK2, NOS3, EIF2B1, EIF2S3, FLT1, HIF1A, VHL, KDR, EIF2S1, EIF1AX, FLT4, PIK3CA, AR<br>NT, PLCG1, PIK3CG, PIK3R1                                                                                                      |
| BIOCARTA_VITCB_PATHWAY     | COL4A1, COL4A2, COL4A3, COL4A4, COL4A6, COL4A5, P4HB, SLC2A3, SLC23A2, SLC23A1<br>, SLC2A1                                                                                                                                                                                                                           |
| BIOCARTA_WNT_PATHWAY       | CSNK2A1, WNT1, CSNK1D, CSNK1A1, GSK3B, BTRC, WIF1, CTNNB1, FZD1, PPP2CA, CREB<br>BP, LEF1, TLE1, CCND1, CTBP1, NLK, APC, MAP3K7, DVL1, PPARD, FRAT1, AXIN1, HDAC1, T<br>AB1, SMAD4, MYC                                                                                                                              |
| BIOCARTA_ACTINY_PATHWAY    | ABI2, WASF2, WASL, ACTA1, PIR, WASF1, ARPC4, PSMA7, ARPC5, ARPC1A, ACTR2, ACTR3,<br>ARPC1B, ARPC3, NCKAP1, WASF3, ARPC2, RAC1, NTRK1, NCK1                                                                                                                                                                           |
